# Supplementary material for: Expanding the toolbox for supramolecular chemistry: probing host–guest interactions and binding with in situ FTIR spectroscopy
Source: Royal Society of Chemistry journal article supplement (doi:10.1039/d5sc01329a), 2025-01-01
Supplement: d5sc01329a1.xlsx [file d5sc01329a1.xlsx]

## Sheet: D-IPr·PF₆_TBACl
Wavenumbers [1/cm]	1	2	3	4	5	6	7	8	9	10	11	12	13	14	15	16	17	18
2348	0.000916201	0.00079145	0.00074208	0.00043715	0.00037139	0.000120006	0.000150597	0.00053551	0.000132371	0.00024025	0.0002009	0.00021517	0.00025321	0.00032706	0.00032598	0.00028808	0.00029646	0.000132839				H (M)	G (M)	eq (G/H)
2346	0.000999619	0.0008006	0.00074253	0.00039196	0.00033674	0.000105	0.000100296	0.00050616	0.000107224	0.00023539	0.000131334	0.00019339	0.000158803	0.00027588	0.00027152	0.00023903	0.00026046	0.000124639			1	0.0483251	0	0
2344	0.00107766	0.00086029	0.0007899	0.00038103	0.00031698	8.7462e-05	7.393e-05	0.00044792	7.7485e-05	0.00020482	7.5602e-05	0.000145314	9.38881e-05	0.000193737	0.00020428	0.00016501	0.000199312	0.000103371			2	0.0483251	0.023002	0.475986
2342	0.00116402	0.00097765	0.00091489	0.00043214	0.00032652	8.2071e-05	0.000101438	0.00037449	7.5224e-05	0.000135417	4.9265e-05	7.8987e-05	5.0527e-05	9.81914e-05	0.00011964	8.7192e-05	0.000118941	7.1035e-05			3	0.0483251	0.0452621	0.936617
2340	0.00130533	0.0011461	0.0011185	0.00058877	0.00040552	0.000129983	0.00022253	0.00033374	0.000131527	5.6601e-05	7.3993e-05	3.9021e-05	5.2803e-05	3.2675e-05	4.9702e-05	4.7486e-05	5.6569e-05	6.774e-05			4	0.0483251	0.0668154	1.38262
2338	0.00153015	0.0013611	0.0013634	0.00084257	0.00056934	0.00025444	0.00043714	0.00036151	0.00026029	2.5751e-05	0.000167427	6.6914e-05	0.000141755	4.0772e-05	3.8569e-05	6.8191e-05	5.0876e-05	0.000134676			5	0.0483251	0.0876952	1.8147
2336	0.00182376	0.001625	0.0016118	0.0011341	0.00079256	0.0004443	0.00070349	0.00045348	0.00045009	7.6745e-05	0.0003247	0.000167293	0.00032201	0.000132922	9.25539e-05	0.000131066	9.778e-05	0.00027719			6	0.0483251	0.107933	2.23347
2334	0.00217567	0.0019509	0.0018675	0.0014257	0.00105458	0.00068913	0.00099365	0.00059902	0.00069209	0.00020886	0.00052835	0.00033583	0.00056724	0.00029827	0.000196837	0.00022365	0.000173953	0.00047775			7	0.0483251	0.127557	2.63956
2332	0.0026018	0.0023517	0.0021651	0.0017299	0.001358	0.00099256	0.0013061	0.00079996	0.00098822	0.00040517	0.00076221	0.0005788	0.00085229	0.00052021	0.00034729	0.0003651	0.0002746	0.00071349			8	0.0483251	0.146595	3.03352
2330	0.00310497	0.002817	0.0025214	0.0020696	0.0016994	0.0013471	0.0016296	0.0010459	0.0013251	0.00064257	0.00100955	0.00088766	0.0011544	0.00077404	0.0005406	0.00056914	0.00040718	0.0009536			9	0.0483251	0.165073	3.4159
2328	0.00364433	0.0033079	0.0029076	0.0024344	0.0020503	0.0017178	0.0019255	0.0013009	0.001661	0.0008931	0.0012465	0.0012069	0.0014374	0.00102502	0.00075484	0.00080299	0.00056731	0.0011648			10	0.0483251	0.183016	3.78719
2326	0.00415677	0.0037721	0.0032656	0.0027797	0.0023703	0.0020556	0.0021507	0.0015224	0.0019398	0.0011325	0.0014476	0.0014564	0.0016549	0.0012375	0.00094935	0.00099898	0.00072785	0.0013297			11	0.0483251	0.200446	4.14787
2324	0.00459765	0.0041609	0.0035437	0.0030563	0.0026311	0.0023249	0.0022879	0.0016861	0.0021187	0.0013506	0.0015941	0.0015924	0.0017843	0.001386	0.00109507	0.0011167	0.00086086	0.001456			12	0.0483251	0.217385	4.4984
2322	0.0049459	0.0044409	0.0037161	0.003229	0.0028213	0.0025107	0.0023459	0.0017887	0.0021868	0.0015486	0.0016817	0.0016334	0.0018436	0.0014631	0.0011966	0.0011695	0.00096009	0.0015603			13	0.0483251	0.233854	4.83919
2320	0.00518382	0.0045994	0.0037821	0.0032791	0.0029321	0.0026044	0.0023409	0.0018353	0.0021592	0.0017168	0.0017186	0.0016192	0.0018643	0.001477	0.0012724	0.0011878	0.00102915	0.0016401			14	0.0483251	0.249871	5.17064
2318	0.00529957	0.004643	0.0037623	0.0032177	0.0029565	0.0026042	0.0022922	0.0018405	0.0020679	0.001828	0.0017221	0.0015717	0.0018623	0.0014515	0.0013333	0.0011905	0.00106906	0.0016795			15	0.0483251	0.265456	5.49313
2316	0.00530401	0.004588	0.0036888	0.0030911	0.0029005	0.0025273	0.0022257	0.0018297	0.0019538	0.0018617	0.0017151	0.0015013	0.001844	0.0014195	0.0013861	0.0011949	0.00108764	0.0016804			16	0.0483251	0.280625	5.80702
2314	0.00521892	0.0044465	0.0035846	0.0029508	0.0027814	0.0024055	0.0021608	0.0018202	0.0018489	0.0018285	0.0017149	0.001425	0.0018232	0.0014048	0.0014402	0.0012213	0.001104	0.0016699			17	0.0483251	0.295395	6.11266
2312	0.00505126	0.0042261	0.0034509	0.0028153	0.0026158	0.0022652	0.0020973	0.0018049	0.0017617	0.0017606	0.0017208	0.0013606	0.0018146	0.0014115	0.0014979	0.0012721	0.0011323	0.0016726			18	0.0483251	0.315431	6.52728
2310	0.00479888	0.0039455	0.003278	0.0026693	0.0024206	0.0021205	0.0020241	0.0017671	0.0016859	0.001683	0.0017173	0.0013146	0.0018162	0.0014331	0.0015496	0.001324	0.0011655	0.0016877
2308	0.00448058	0.0036411	0.0030691	0.0024978	0.0022189	0.0019788	0.0019345	0.0017051	0.0016216	0.0016007	0.0016923	0.0012874	0.0018132	0.0014623	0.0015834	0.0013526	0.0011835	0.001699
2306	0.00414092	0.0033495	0.002845	0.0023084	0.0020296	0.0018447	0.001829	0.0016283	0.0015768	0.0015109	0.0016474	0.0012794	0.0017948	0.0014881	0.0015964	0.0013525	0.001172	0.0016923
2304	0.00382056	0.0030859	0.0026298	0.0021263	0.0018518	0.0017175	0.0017096	0.0015397	0.0015479	0.0014167	0.0015886	0.0012853	0.0017587	0.0014957	0.0015903	0.001329	0.0011299	0.0016594
2302	0.00353422	0.0028441	0.002437	0.001974	0.0016735	0.001595	0.0015803	0.0014358	0.001515	0.0013247	0.0015171	0.0012888	0.0017063	0.0014785	0.0015644	0.001285	0.00106642	0.0015982
2300	0.00327641	0.002609	0.0022626	0.0018499	0.0014922	0.0014741	0.0014466	0.0013159	0.0014577	0.0012333	0.0014304	0.0012691	0.0016377	0.001437	0.0015135	0.0012195	0.00098956	0.001514
2298	0.00303126	0.0023616	0.0020865	0.0017226	0.0013164	0.0013447	0.0013061	0.0011788	0.0013657	0.0011285	0.0013239	0.0012112	0.0015504	0.001362	0.0014277	0.0011306	0.00089514	0.0014138
2296	0.00277998	0.0020898	0.0018859	0.0015558	0.0011545	0.0011953	0.0011525	0.00102105	0.0012387	0.00099959	0.0011947	0.0011134	0.0014438	0.0012419	0.001302	0.00101755	0.00077572	0.0013006
2294	0.00251598	0.0018071	0.0016552	0.0013466	0.00101014	0.00103043	0.00099159	0.00085125	0.00108751	0.00085494	0.00105187	0.00098945	0.0013272	0.00109251	0.0011523	0.00088655	0.00064358	0.0011806
2292	0.00225457	0.0015501	0.0014108	0.0011292	0.0008849	0.00087067	0.00084057	0.00069208	0.00093239	0.00071555	0.00091876	0.00086071	0.0012169	0.00095575	0.00100968	0.00075254	0.00052929	0.00106804
2290	0.00201837	0.0013441	0.0011722	0.00093715	0.00077374	0.00073096	0.00070906	0.00055724	0.00079084	0.0005938	0.00081685	0.00074174	0.0011252	0.00085659	0.00089344	0.00062918	0.00045007	0.00097444
2288	0.00181463	0.0011793	0.00094854	0.00077806	0.00066529	0.00061119	0.00059373	0.00043844	0.00066899	0.00048811	0.00074936	0.00063631	0.00105488	0.00077922	0.00079896	0.00052331	0.00039586	0.00089846
2286	0.00163679	0.00103547	0.00074935	0.00064827	0.00055758	0.0005132	0.00049976	0.00032645	0.00057081	0.00039879	0.00070744	0.00055	0.00100787	0.00069931	0.0007195	0.00044389	0.00035737	0.00083568
2284	0.00148291	0.00091483	0.00059337	0.0005531	0.00046786	0.00044889	0.0004481	0.0002315	0.00050672	0.0003347	0.00068555	0.00049696	0.00098895	0.00061926	0.00066304	0.00040417	0.00034614	0.00079313
2282	0.0013573	0.00083355	0.00049156	0.00049545	0.00041431	0.00041911	0.00044604	0.000167763	0.00048186	0.00029856	0.00067977	0.00048417	0.00099233	0.00055365	0.00063481	0.00040331	0.000367	0.00077985
2280	0.0012552	0.00078968	0.0004301	0.00045864	0.00039132	0.00039968	0.00046573	0.000129672	0.00048326	0.0002807	0.00067686	0.00049739	0.00099485	0.00049942	0.00061948	0.00041644	0.00039184	0.00078735
2278	0.00116453	0.00076365	0.0003862	0.00042167	0.00037488	0.00036475	0.00047039	0.000101681	0.00049157	0.00027684	0.00066123	0.00051674	0.0009757	0.00044449	0.00059967	0.00041728	0.00039027	0.00079513
2276	0.0010851	0.0007461	0.00035668	0.0003853	0.00034916	0.00031425	0.00045227	8.278e-05	0.00050065	0.000298	0.00063218	0.00053982	0.00093837	0.0003928	0.00057979	0.00040444	0.00037286	0.00079413
2274	0.00102945	0.00074228	0.00035411	0.00036632	0.00031523	0.00026423	0.00042938	8.3133e-05	0.00051428	0.00035066	0.0006027	0.00057429	0.00090344	0.00035812	0.00057329	0.00039421	0.00037463	0.00079135
2272	0.00100138	0.00075016	0.00037864	0.00037095	0.00027811	0.00022216	0.00041628	0.00010259	0.00053168	0.00041879	0.00058242	0.00061361	0.0008841	0.00034254	0.0005778	0.00039635	0.00040595	0.00079364
2270	0.000985892	0.00075525	0.00041157	0.00038912	0.00024092	0.000187818	0.00041399	0.000130257	0.00054908	0.00048067	0.00057049	0.00063726	0.00087724	0.00034166	0.00058138	0.00040921	0.00044788	0.00079949
2268	0.000966282	0.00075107	0.00043772	0.00041186	0.00021142	0.000167754	0.00041936	0.00016108	0.00056775	0.00053537	0.00056311	0.0006347	0.00087274	0.00036273	0.00058414	0.0004301	0.00048908	0.00080669
2266	0.000941221	0.00074624	0.00045726	0.00043874	0.000199518	0.000167769	0.00042562	0.000195726	0.00058509	0.00059323	0.0005572	0.00061358	0.00086147	0.00041436	0.00059274	0.00045506	0.00053507	0.00081508
2264	0.000918349	0.000745	0.00047086	0.0004675	0.00020392	0.000176488	0.00041869	0.00022616	0.0005842	0.00065003	0.00054775	0.0005831	0.00083826	0.00048231	0.00060078	0.00047471	0.00058039	0.00081966
2262	0.000900763	0.00073734	0.00046835	0.00049089	0.0002103	0.000176581	0.00039041	0.0002383	0.00054963	0.00068664	0.00053245	0.000544	0.00080666	0.00053705	0.00059542	0.00048513	0.00060275	0.00081171
2260	0.000889291	0.00071483	0.00044206	0.00050484	0.00020702	0.000170741	0.00035429	0.00023094	0.00049214	0.00069377	0.00052034	0.00049977	0.0007788	0.00056597	0.00057986	0.00049908	0.00059419	0.00079076
2258	0.000888318	0.00068407	0.00040072	0.00051021	0.000196348	0.000178184	0.00033426	0.00021868	0.00044233	0.00068079	0.00052641	0.00046394	0.00076304	0.00058048	0.00056992	0.00053204	0.00057356	0.00076828
2256	0.000901466	0.00065385	0.00036037	0.00050387	0.000187266	0.00020415	0.00033658	0.00021334	0.00041791	0.00065684	0.00055361	0.00044668	0.00075327	0.00059264	0.00056777	0.00057869	0.00055642	0.00075557
2254	0.000921684	0.00062061	0.00032384	0.00047596	0.00018486	0.0002308	0.00034414	0.00021296	0.0004112	0.00061964	0.00058736	0.00044126	0.00073613	0.00059845	0.0005584	0.00061665	0.00053272	0.00075211
2252	0.000934466	0.00057589	0.000284	0.00042056	0.000188437	0.00024099	0.00033753	0.00021219	0.00040992	0.00057189	0.00061095	0.0004327	0.00070567	0.00058904	0.00053387	0.00063111	0.00048911	0.00074679
2250	0.000934391	0.00052315	0.00023865	0.0003443	0.000193578	0.0002341	0.00031177	0.00021439	0.00041376	0.00053058	0.00061988	0.00041676	0.0006668	0.00056164	0.00050443	0.00062149	0.00043311	0.00072801
2248	0.000931065	0.00047457	0.000195458	0.00026607	0.000195057	0.00021722	0.00027143	0.00022547	0.00042533	0.00051285	0.00061968	0.00040223	0.00062466	0.0005217	0.0004809	0.0005924	0.00038732	0.00069675
2246	0.000935868	0.0004362	0.000162899	0.00020706	0.000191691	0.000193303	0.00022785	0.0002483	0.00044392	0.0005171	0.00061856	0.00040248	0.00058643	0.00048245	0.00046463	0.00054981	0.00036494	0.0006681
2244	0.000946938	0.00040561	0.000143455	0.000176542	0.000190024	0.000166664	0.000199449	0.0002829	0.00047094	0.00052665	0.00062004	0.00042564	0.00056315	0.00046167	0.0004578	0.00050749	0.00036353	0.00065836
2242	0.000949828	0.00037997	0.000135455	0.000164029	0.000196799	0.000147402	0.000199917	0.00032701	0.00050825	0.00052765	0.00061755	0.00046949	0.00055941	0.00046826	0.00046326	0.00048086	0.00037207	0.00066602
2240	0.000931942	0.00035835	0.000136413	0.000149655	0.00020673	0.000141744	0.00022126	0.00037484	0.000544	0.00051718	0.00059691	0.00052079	0.00056465	0.00049122	0.00047098	0.00047154	0.00037448	0.00067022
2238	0.00089571	0.00034028	0.000144593	0.000127439	0.00020502	0.000145698	0.0002397	0.00042024	0.00055335	0.00049853	0.00055216	0.00056208	0.00056575	0.00051121	0.00046191	0.0004697	0.00035726	0.00065474
2236	0.000858402	0.00032924	0.000160885	0.000113648	0.000185487	0.000154415	0.00024323	0.00046118	0.00052398	0.00047696	0.00049855	0.00058397	0.00056546	0.00052299	0.00043303	0.00047387	0.00032565	0.00062807
2234	0.000838958	0.00033425	0.000189317	0.0001267	0.000159651	0.00017075	0.00024416	0.00049779	0.00047299	0.00045881	0.00046184	0.00059151	0.0005773	0.00053745	0.00040442	0.00049614	0.00030621	0.00061247
2232	0.000843419	0.00036071	0.00023281	0.000165495	0.000144505	0.000199504	0.00026055	0.00052695	0.00042989	0.00044946	0.00045364	0.00059781	0.00060392	0.00056313	0.00039416	0.00054473	0.00032408	0.00061886
2230	0.000861083	0.00039996	0.00028636	0.00021349	0.000146573	0.00023758	0.0002949	0.0005433	0.00040714	0.0004489	0.00046416	0.00061088	0.0006314	0.00059392	0.00039736	0.00060998	0.0003786	0.00064112
2228	0.000872757	0.0004329	0.00033566	0.0002559	0.000159238	0.00027415	0.00033437	0.00054352	0.00039259	0.00044955	0.00047732	0.00062361	0.00064254	0.00061324	0.00039554	0.00067105	0.00044416	0.00066743
2226	0.000864267	0.00044442	0.00036514	0.00028538	0.000171415	0.00029862	0.00036467	0.00052761	0.00036885	0.00044242	0.0004859	0.00061722	0.00062791	0.00060505	0.00037911	0.00071162	0.00049237	0.0006874
2224	0.000837474	0.00043386	0.00037047	0.00030157	0.000178405	0.00030836	0.00038149	0.00050107	0.00033658	0.00042979	0.00049478	0.00058157	0.00058964	0.00056668	0.00035683	0.00073008	0.00051384	0.00069591
2222	0.000811583	0.00041368	0.00036444	0.00031717	0.000189162	0.00031174	0.00039408	0.00047915	0.00032006	0.00042958	0.00051769	0.00053526	0.00054531	0.0005183	0.00035029	0.00074041	0.00052402	0.00070245
2220	0.00080892	0.00039885	0.00036598	0.00035575	0.00022159	0.00032236	0.00041806	0.00048104	0.0003482	0.00045894	0.00056876	0.00051735	0.00052232	0.00049292	0.00038159	0.00075973	0.00054837	0.00072904
2218	0.00083286	0.00039389	0.00037963	0.00042695	0.00028336	0.00034595	0.0004599	0.00051211	0.00042478	0.00051197	0.0006467	0.00055143	0.00053523	0.00050773	0.00045722	0.00078943	0.00059702	0.00078563
2216	0.000861536	0.00038969	0.0003898	0.00050771	0.00035702	0.00037588	0.00051016	0.00055819	0.0005198	0.00056219	0.00072823	0.00062298	0.00057089	0.00055161	0.00056093	0.00081396	0.00065524	0.00085377
2214	0.000867769	0.00037548	0.00037962	0.00056265	0.00041164	0.00040631	0.00055591	0.00060438	0.00059622	0.00059193	0.00078692	0.00069837	0.00060755	0.00060737	0.00066816	0.00082386	0.00070247	0.00090748
2212	0.000843707	0.00035316	0.00035217	0.00057995	0.00043139	0.00044373	0.00059436	0.00065114	0.00064297	0.00061119	0.00081869	0.00075849	0.00064491	0.00067588	0.0007668	0.00083176	0.00073727	0.00094523
2210	0.000802744	0.00033489	0.00032729	0.00057408	0.00042738	0.00049634	0.00062786	0.00070328	0.00067502	0.00064132	0.00084066	0.00080536	0.00069805	0.00076133	0.00085539	0.00085503	0.00077247	0.0009829
2208	0.000760773	0.00032709	0.00032027	0.00055912	0.00042268	0.00055804	0.00065316	0.00075363	0.00070765	0.00068908	0.00086292	0.00084142	0.00076793	0.00085177	0.00093051	0.00089095	0.00081827	0.00102707
2206	0.000722107	0.00032434	0.00033054	0.00053816	0.00043285	0.00061498	0.00066477	0.00079097	0.00074162	0.0007449	0.00087873	0.00086634	0.00083594	0.00092792	0.00098552	0.00092517	0.00087623	0.00107135
2204	0.000682341	0.00031934	0.00034854	0.00051711	0.00046067	0.0006652	0.00066836	0.00081716	0.00077251	0.00080213	0.00088063	0.00088791	0.00088784	0.00098537	0.00102124	0.000954	0.00094443	0.0011147
2202	0.000636957	0.00031091	0.00036508	0.00050717	0.00050125	0.00071877	0.00067794	0.0008433	0.00079915	0.00086144	0.00087383	0.00092043	0.00092721	0.0010309	0.00104621	0.0009845	0.00101591	0.001163
2200	0.000585658	0.00030148	0.0003747	0.00051091	0.00054754	0.00078172	0.00070222	0.00087383	0.00082151	0.00092231	0.00087134	0.00096971	0.00096322	0.00106529	0.00106769	0.00102035	0.00107757	0.001215
2198	0.000534984	0.00029652	0.00038072	0.00052289	0.00059851	0.00085281	0.00074376	0.00091042	0.00084561	0.00098494	0.00088731	0.00103234	0.00100257	0.00109023	0.00109478	0.00106572	0.0011261	0.0012677
2196	0.000499093	0.00030952	0.00040013	0.00054978	0.00066488	0.00093526	0.00080818	0.00096642	0.0008933	0.00105985	0.00093767	0.0011114	0.00105819	0.0011263	0.0011479	0.0011372	0.0011816	0.0013359
2194	0.000492903	0.00035563	0.0004539	0.00061267	0.00075928	0.00103608	0.00090086	0.00105926	0.00099105	0.0011622	0.00103499	0.0012181	0.0011485	0.0012016	0.0012496	0.0012506	0.0012703	0.0014443
2192	0.000520307	0.00043276	0.0005457	0.00072086	0.00087734	0.0011511	0.00101512	0.0011869	0.0011409	0.0012931	0.0011759	0.0013536	0.0012772	0.0013225	0.0014013	0.001396	0.0013933	0.0015958
2190	0.000569675	0.00051643	0.00065671	0.00085677	0.00099612	0.0012645	0.0011372	0.0013263	0.0013124	0.0014362	0.0013406	0.0015014	0.0014241	0.0014728	0.0015809	0.0015444	0.0015287	0.0017657
2188	0.000621569	0.00058172	0.00076507	0.00099492	0.001096	0.001368	0.0012642	0.0014577	0.0014717	0.0015748	0.0015097	0.0016437	0.0015666	0.0016405	0.0017644	0.0016808	0.0016624	0.0019329
2186	0.000659044	0.00062532	0.00086461	0.0011236	0.0011783	0.0014679	0.0014041	0.0015774	0.001611	0.0017049	0.0016762	0.0017756	0.0017029	0.0018264	0.0019418	0.0018152	0.0017996	0.0020987
2184	0.00067287	0.00066011	0.00096034	0.0012409	0.0012573	0.0015697	0.001556	0.0016869	0.0017439	0.001831	0.0018401	0.0018993	0.0018469	0.0020243	0.0021103	0.0019592	0.0019476	0.0022687
2182	0.000663759	0.00069592	0.00105322	0.0013442	0.001342	0.0016653	0.0017032	0.0017842	0.0018813	0.0019572	0.0020003	0.0020154	0.0020067	0.0022156	0.0022656	0.0021095	0.0021039	0.0024361
2180	0.000641152	0.0007351	0.0011382	0.0014364	0.0014322	0.0017441	0.0018295	0.0018709	0.0020207	0.0020858	0.0021564	0.0021266	0.0021769	0.0023874	0.0024048	0.0022578	0.0022655	0.0025923
2178	0.000615143	0.0007809	0.0012139	0.0015319	0.0015272	0.0018061	0.0019341	0.0019556	0.0021545	0.0022155	0.0023101	0.002243	0.0023477	0.0025427	0.0025302	0.0024024	0.0024335	0.00274
2176	0.000588538	0.00083814	0.0012858	0.0016428	0.0016298	0.0018611	0.0020276	0.002045	0.0022798	0.0023407	0.0024606	0.0023748	0.0025147	0.0026876	0.0026464	0.002546	0.0026043	0.0028844
2174	0.000560278	0.00090802	0.0013599	0.0017641	0.0017436	0.0019221	0.0021248	0.0021406	0.0024032	0.0024582	0.0026054	0.0025261	0.0026791	0.0028251	0.0027622	0.0026951	0.0027709	0.0030236
2172	0.000534977	0.00099073	0.0014379	0.0018826	0.0018718	0.0020029	0.0022385	0.0022454	0.0025364	0.0025744	0.0027461	0.0026949	0.0028419	0.0029629	0.0028905	0.0028626	0.0029371	0.0031564
2170	0.000521519	0.0010888	0.0015179	0.001993	0.0020123	0.00211	0.0023692	0.002365	0.0026827	0.0026981	0.0028851	0.0028729	0.0029965	0.0031097	0.0030373	0.0030561	0.0031133	0.0032884
2168	0.000521095	0.0011975	0.001595	0.0020957	0.0021533	0.0022313	0.0024956	0.0024978	0.0028285	0.0028272	0.0030157	0.0030415	0.0031304	0.0032586	0.0031902	0.0032603	0.0032951	0.0034224
2166	0.000525687	0.0012962	0.0016628	0.0021866	0.0022779	0.002343	0.0025915	0.0026339	0.0029541	0.0029538	0.0031262	0.0031814	0.0032376	0.0033909	0.0033299	0.0034467	0.0034614	0.0035535
2164	0.000530613	0.0013631	0.0017201	0.0022609	0.0023805	0.0024372	0.0026569	0.0027676	0.0030566	0.0030806	0.0032194	0.0032917	0.0033296	0.0035027	0.0034526	0.0036039	0.0036008	0.0036814
2162	0.000540599	0.0013997	0.0017773	0.0023251	0.0024749	0.0025319	0.0027234	0.0029026	0.0031539	0.0032201	0.0033172	0.0033916	0.0034251	0.003612	0.003571	0.0037449	0.0037255	0.0038162
2160	0.00055892	0.0014272	0.0018488	0.0023906	0.0025798	0.0026486	0.0028169	0.0030411	0.0032626	0.0033764	0.0034378	0.0034962	0.0035315	0.0037321	0.0036947	0.0038796	0.0038497	0.0039616
2158	0.000578514	0.0014595	0.001939	0.0024572	0.0026974	0.0027861	0.0029321	0.0031774	0.0033806	0.0035376	0.0035768	0.0035995	0.0036414	0.0038531	0.0038207	0.0039983	0.0039698	0.0041045
2156	0.000590864	0.0014926	0.0020371	0.0025138	0.0028123	0.0029251	0.0030435	0.0033051	0.0034939	0.0036915	0.0037163	0.0036896	0.0037481	0.0039576	0.0039437	0.0040866	0.0040737	0.0042301
2154	0.00059874	0.0015217	0.0021277	0.0025563	0.0029104	0.0030497	0.003136	0.0034232	0.0035952	0.0038362	0.003846	0.0037711	0.0038556	0.0040452	0.0040618	0.004146	0.0041609	0.0043394
2152	0.00061155	0.0015526	0.0022034	0.0025944	0.0029905	0.0031552	0.0032148	0.0035326	0.0036864	0.0039713	0.0039663	0.0038577	0.0039705	0.0041288	0.0041719	0.0041895	0.0042426	0.0044429
2150	0.000629199	0.0015868	0.0022638	0.002638	0.0030568	0.0032404	0.0032909	0.0036305	0.0037691	0.0040877	0.0040791	0.0039554	0.0040904	0.0042196	0.0042685	0.0042282	0.0043257	0.0045425
2148	0.000638386	0.0016095	0.0023044	0.0026826	0.0031064	0.0033029	0.0033659	0.0037113	0.0038427	0.0041718	0.0041794	0.0040523	0.0042031	0.0043165	0.0043512	0.0042704	0.0044086	0.004629
2146	0.000626333	0.0016049	0.0023159	0.0027147	0.0031315	0.0033432	0.0034325	0.0037695	0.0039071	0.0042189	0.0042589	0.0041322	0.0042908	0.0044122	0.004424	0.0043229	0.0044861	0.0046959
2144	0.000593456	0.0015771	0.0022947	0.0027283	0.0031301	0.0033666	0.0034826	0.0038028	0.0039631	0.0042379	0.0043153	0.0041901	0.0043438	0.0045016	0.0044883	0.0043887	0.0045564	0.0047474
2142	0.000551379	0.0015425	0.0022522	0.0027319	0.0031117	0.0033801	0.0035169	0.0038193	0.0040117	0.0042459	0.004357	0.0042375	0.004374	0.0045873	0.004547	0.004468	0.0046262	0.0047988
2140	0.000512736	0.0015095	0.002208	0.0027432	0.0030916	0.00339	0.0035473	0.0038393	0.0040575	0.0042631	0.0043997	0.0042955	0.004411	0.0046805	0.0046108	0.004563	0.0047113	0.0048699
2138	0.000483026	0.0014774	0.0021761	0.002775	0.0030828	0.0034013	0.003588	0.0038808	0.0041088	0.004304	0.004456	0.0043809	0.0044779	0.004791	0.0046891	0.0046758	0.0048231	0.0049719
2136	0.000459007	0.0014519	0.0021581	0.0028264	0.0030916	0.0034162	0.0036422	0.0039407	0.0041706	0.0043698	0.0045262	0.0044926	0.0045699	0.0049128	0.004775	0.0047989	0.004955	0.005093
2134	0.000432777	0.0014436	0.0021499	0.0028817	0.003117	0.0034341	0.0036995	0.0039979	0.0042359	0.0044468	0.0045999	0.0046098	0.0046631	0.0050221	0.0048511	0.0049133	0.0050848	0.005203
2132	0.000398936	0.0014498	0.0021483	0.0029196	0.0031505	0.0034535	0.0037452	0.004033	0.0042888	0.0045179	0.0046622	0.004708	0.0047387	0.0050922	0.0049101	0.0050008	0.0051923	0.0052757
2130	0.000361001	0.001454	0.0021532	0.0029266	0.0031792	0.003473	0.0037704	0.0040437	0.0043169	0.0045744	0.0046991	0.0047744	0.0047922	0.0051099	0.0049569	0.005052	0.0052668	0.0053066
2128	0.00033188	0.0014486	0.0021642	0.0029047	0.0031957	0.0034906	0.0037748	0.0040399	0.0043217	0.004617	0.0047024	0.0048092	0.0048258	0.005081	0.004993	0.0050651	0.0053028	0.0053081
2126	0.000326553	0.001445	0.0021811	0.0028684	0.0032059	0.003505	0.0037651	0.0040333	0.0043163	0.0046485	0.0046773	0.0048165	0.0048422	0.0050279	0.0050117	0.0050462	0.0052994	0.0052933
2124	0.000350447	0.0014522	0.0022015	0.002833	0.0032205	0.0035161	0.0037476	0.0040297	0.004312	0.004666	0.0046416	0.0047979	0.0048451	0.0049754	0.0050084	0.0050088	0.0052643	0.0052653
2122	0.00039234	0.0014582	0.0022151	0.0028027	0.0032367	0.0035187	0.0037173	0.0040205	0.0043027	0.0046592	0.0046071	0.004751	0.0048309	0.0049296	0.0049795	0.0049613	0.0052061	0.005216
2120	0.000431511	0.0014424	0.0022069	0.0027689	0.0032345	0.0034978	0.0036577	0.0039838	0.004269	0.0046156	0.0045648	0.0046694	0.0047823	0.0048703	0.004914	0.004894	0.0051201	0.0051343
2118	0.000455996	0.0014023	0.0021713	0.0027212	0.0031964	0.0034391	0.00356	0.0039037	0.0042006	0.0045322	0.0044979	0.0045498	0.0046834	0.0047753	0.0048033	0.0047922	0.0049968	0.0050215
2116	0.000473437	0.001355	0.0021222	0.0026594	0.0031269	0.0033452	0.003441	0.0037908	0.0041114	0.0044189	0.0044061	0.0044033	0.0045426	0.0046499	0.0046617	0.0046616	0.0048444	0.0048972
2114	0.000500162	0.0013173	0.0020815	0.0025931	0.0030462	0.0032341	0.0033302	0.003674	0.0040243	0.0042894	0.004305	0.0042537	0.0043891	0.0045226	0.0045177	0.0045268	0.0046877	0.0047813
2112	0.00054037	0.0012941	0.0020568	0.0025298	0.0029685	0.0031183	0.0032407	0.0035696	0.0039436	0.0041486	0.0042014	0.0041201	0.0042442	0.0044124	0.0043818	0.0044035	0.004541	0.0046716
2110	0.000581298	0.0012843	0.002035	0.0024683	0.0028951	0.0029964	0.0031622	0.0034698	0.0038532	0.0039948	0.0040844	0.0040038	0.004109	0.0043146	0.0042402	0.0042866	0.0043981	0.00455
2108	0.000609333	0.0012859	0.0019987	0.002403	0.0028241	0.0028673	0.0030824	0.0033625	0.0037408	0.0038328	0.0039465	0.003897	0.0039795	0.0042166	0.0040862	0.0041706	0.0042542	0.0044104
2106	0.000624674	0.0012915	0.0019449	0.0023319	0.0027577	0.0027434	0.0030038	0.0032499	0.0036118	0.0036776	0.0037981	0.0037978	0.0038618	0.0041149	0.0039378	0.0040637	0.0041216	0.0042675
2104	0.00063777	0.001289	0.0018855	0.0022571	0.0026952	0.0026411	0.0029337	0.0031427	0.0034783	0.0035431	0.003654	0.0037095	0.0037625	0.0040085	0.0038162	0.0039726	0.0040109	0.004137
2102	0.000656513	0.0012707	0.001833	0.0021829	0.0026289	0.0025645	0.0028712	0.0030455	0.0033442	0.0034308	0.0035154	0.0036285	0.0036766	0.0038929	0.0037196	0.0038869	0.0039092	0.0040173
2100	0.000680509	0.0012381	0.001787	0.0021123	0.002551	0.0025034	0.0028076	0.0029545	0.0032084	0.0033292	0.0033743	0.0035389	0.0035914	0.0037665	0.003631	0.0037888	0.003792	0.0038966
2098	0.000703388	0.0011939	0.0017366	0.0020444	0.0024606	0.0024437	0.0027328	0.0028619	0.0030718	0.0032202	0.0032277	0.003424	0.0034955	0.0036345	0.0035371	0.0036716	0.0036479	0.0037655
2096	0.000714815	0.0011367	0.0016707	0.0019729	0.0023587	0.0023734	0.0026356	0.0027545	0.0029347	0.0030883	0.0030783	0.0032778	0.0033804	0.003498	0.0034286	0.0035348	0.0034827	0.0036159
2094	0.000702705	0.00106511	0.0015861	0.0018895	0.0022395	0.002282	0.0025061	0.0026174	0.0027901	0.0029281	0.0029248	0.003103	0.0032377	0.0033446	0.0032927	0.0033714	0.0033024	0.0034385
2092	0.000660243	0.00098091	0.001484	0.001788	0.0020913	0.0021613	0.0023422	0.0024445	0.0026271	0.0027445	0.0027592	0.0029027	0.0030613	0.0031576	0.0031192	0.0031695	0.0031031	0.0032299
2090	0.000592059	0.00088508	0.0013634	0.0016637	0.0019073	0.0020075	0.0021506	0.0022441	0.0024384	0.0025401	0.0025714	0.0026753	0.0028488	0.0029291	0.0029088	0.0029254	0.002878	0.0029949
2088	0.000510717	0.00077759	0.0012232	0.0015128	0.0016942	0.001822	0.0019404	0.0020298	0.0022247	0.0023112	0.0023545	0.0024201	0.0026021	0.0026648	0.0026707	0.0026503	0.0026264	0.0027401
2086	0.000427079	0.0006651	0.00107096	0.001339	0.001473	0.0016143	0.0017225	0.0018122	0.0019969	0.0020602	0.0021122	0.0021473	0.0023342	0.002383	0.0024161	0.0023665	0.0023598	0.0024708
2084	0.000345742	0.00056175	0.00092302	0.0011594	0.0012708	0.0014025	0.001515	0.0016013	0.0017732	0.001808	0.0018632	0.0018813	0.0020727	0.0021098	0.0021594	0.0021006	0.0021006	0.0022008
2082	0.00026719	0.00047663	0.00079163	0.00099464	0.0011052	0.0012057	0.0013365	0.0014067	0.0015689	0.0015822	0.001631	0.0016459	0.0018442	0.0018655	0.0019166	0.00187	0.0018706	0.0019507
2080	0.000193928	0.00040416	0.0006757	0.00085068	0.00097448	0.00103053	0.0011887	0.0012322	0.0013844	0.0013927	0.0014257	0.001448	0.0016509	0.0016514	0.0016953	0.001672	0.001677	0.0017325
2078	0.000131538	0.00033292	0.0005702	0.00071802	0.00086496	0.00087349	0.00105615	0.00107461	0.0012105	0.0012299	0.0012423	0.0012778	0.001475	0.0014562	0.001493	0.0014924	0.0015127	0.0015443
2076	8.87651e-05	0.00026211	0.00048063	0.00059331	0.0007678	0.00073615	0.00092869	0.00093519	0.00104658	0.00108787	0.0010812	0.0011282	0.0013086	0.0012791	0.0013124	0.0013276	0.0013715	0.001386
2074	7.37456e-05	0.00020201	0.00041684	0.00049143	0.0006865	0.00062977	0.00081629	0.00082459	0.00090672	0.00097291	0.00095677	0.00100635	0.0011672	0.0011347	0.0011673	0.0011903	0.0012563	0.0012683
2072	8.70048e-05	0.000160727	0.00037884	0.00042984	0.00062783	0.00056071	0.00073339	0.00074758	0.00080378	0.00089028	0.00087976	0.00092145	0.00106419	0.00103685	0.00106669	0.00109243	0.0011728	0.0011992
2070	0.000118008	0.000136541	0.00035651	0.00040459	0.00059035	0.00051792	0.00067983	0.00069249	0.00073697	0.00082882	0.00083978	0.00086996	0.00099113	0.00098014	0.00100089	0.00102675	0.0011176	0.0011651
2068	0.000149709	0.00012136	0.00034097	0.0003937	0.00056459	0.00048386	0.00064007	0.00063836	0.00069314	0.00077076	0.00081213	0.00083413	0.0009254	0.00094448	0.0009506	0.00097612	0.00107922	0.0011402
2066	0.000168046	0.000106773	0.00032803	0.00038004	0.00053947	0.00045069	0.00059797	0.00057517	0.00065795	0.00070975	0.00077975	0.00079761	0.00085645	0.00091149	0.0009038	0.00093116	0.00104558	0.0011077
2064	0.000170008	9.02039e-05	0.00031398	0.00036433	0.00050917	0.0004226	0.00054905	0.00051361	0.00062447	0.0006556	0.00074306	0.00075866	0.00079481	0.00087592	0.00086278	0.00089538	0.00101296	0.00106905
2062	0.000166629	8.1288e-05	0.00029939	0.00035868	0.00048055	0.00041077	0.00050536	0.00047734	0.00059959	0.00062782	0.00071513	0.00073047	0.00076089	0.00084957	0.00084082	0.00088086	0.00099286	0.001039
2060	0.000177676	9.99401e-05	0.00029778	0.00037577	0.00047543	0.00043132	0.00049252	0.00048746	0.00060507	0.00064744	0.00071518	0.00073265	0.00077163	0.00085674	0.00085637	0.00090459	0.00100914	0.00103865
2058	0.000217452	0.000160223	0.00032796	0.00042276	0.00051677	0.00049776	0.00053369	0.00054893	0.00066214	0.00072517	0.00075963	0.00077968	0.00083183	0.00091617	0.00092173	0.00097946	0.00107812	0.00108413
2056	0.000280918	0.00025436	0.00039175	0.00049511	0.00060486	0.00060428	0.00062705	0.00064544	0.00076749	0.00084787	0.00084676	0.00087039	0.00092833	0.00102046	0.00102859	0.0010986	0.0011882	0.0011712
2054	0.000345223	0.00035624	0.00046639	0.00057206	0.00071049	0.00071995	0.0007414	0.00074831	0.00088919	0.00098018	0.00095096	0.00098523	0.00103375	0.0011375	0.0011465	0.0012316	0.0013056	0.0012731
2052	0.000388615	0.00044142	0.00052503	0.00062637	0.0007969	0.00081035	0.00083856	0.00083387	0.00099175	0.00108701	0.00104063	0.00109563	0.0011221	0.001235	0.001241	0.0013436	0.0014021	0.0013606
2050	0.000407818	0.00050106	0.00055983	0.00064557	0.00084735	0.00086478	0.00089845	0.00089481	0.00106156	0.0011554	0.0011026	0.0011793	0.0011827	0.0012999	0.0012941	0.001418	0.0014702	0.0014224
2048	0.000416423	0.00054005	0.00058143	0.0006427	0.00086976	0.00089605	0.00092374	0.00093728	0.0011057	0.0011933	0.0011444	0.0012301	0.001219	0.0013355	0.0013081	0.001458	0.0015135	0.0014649
2046	0.000430294	0.00056849	0.00060288	0.00064237	0.00088016	0.00091729	0.00092834	0.00096925	0.0011335	0.0012123	0.0011758	0.001254	0.0012371	0.0013473	0.0012958	0.001472	0.0015335	0.0014946
2044	0.000456222	0.00059213	0.00062813	0.00065488	0.00088558	0.00092614	0.00092416	0.0009892	0.001145	0.0012129	0.0011926	0.0012555	0.001235	0.0013353	0.0012674	0.001461	0.0015259	0.001507
2042	0.000488756	0.00060307	0.00064913	0.00066566	0.00087883	0.00090908	0.00091127	0.00098207	0.0011308	0.0011841	0.0011783	0.0012269	0.0012005	0.0012907	0.0012197	0.0014163	0.0014807	0.0014869
2040	0.00051284	0.0005818	0.00064848	0.00065037	0.00084469	0.00085429	0.0008752	0.00092888	0.0010782	0.0011119	0.0011159	0.0011522	0.0011184	0.0011977	0.0011367	0.0013245	0.0013832	0.0014155
2038	0.000514685	0.00051979	0.00061245	0.00060039	0.00077485	0.0007636	0.00080194	0.00082882	0.00098264	0.0009953	0.00100298	0.00102664	0.00098791	0.00105051	0.0010094	0.0011815	0.0012283	0.0012865
2036	0.00049762	0.00044084	0.00054962	0.00053375	0.00068231	0.00065917	0.00070134	0.0007116	0.00086133	0.00085856	0.00086273	0.00087073	0.00083501	0.00087159	0.00085684	0.00100845	0.00104172	0.0011209
2034	0.000485029	0.00038787	0.00049101	0.00047962	0.00059821	0.00057473	0.00060732	0.00061814	0.00074802	0.00074063	0.00073658	0.00072153	0.0006981	0.00070454	0.00071879	0.00084693	0.00087057	0.00096023
2032	0.000500399	0.00038303	0.00046256	0.00045227	0.00054864	0.00053082	0.00054814	0.0005661	0.00066639	0.00066499	0.00065437	0.0006056	0.0006004	0.00058487	0.00062598	0.00073121	0.00074934	0.00083864
2030	0.00054433	0.00040956	0.00046019	0.00044213	0.00053493	0.00051899	0.00052305	0.00054138	0.00061091	0.00062198	0.00061492	0.00052823	0.00053847	0.00051686	0.00057909	0.00066774	0.00067698	0.00076156
2028	0.000595994	0.00043683	0.00045982	0.00043146	0.00053908	0.00051583	0.00051504	0.00052382	0.0005614	0.00058682	0.00059452	0.0004813	0.00049834	0.00048375	0.00055947	0.00063984	0.00063432	0.00071487
2026	0.000634808	0.00045149	0.00044708	0.00041236	0.00054324	0.00050784	0.0005125	0.00050782	0.00050903	0.00054593	0.00057337	0.00045623	0.0004728	0.00046874	0.00054731	0.00062793	0.00060935	0.00068527
2024	0.000653111	0.00045608	0.00042672	0.00038697	0.00053789	0.00049576	0.00050994	0.00049203	0.00046002	0.00050244	0.00054568	0.00044366	0.00045734	0.00045962	0.00052631	0.00061843	0.00059624	0.00066341
2022	0.000650207	0.00044903	0.00040568	0.00035602	0.0005176	0.00047847	0.00049705	0.00046485	0.00041891	0.00046072	0.0005093	0.00042889	0.00044084	0.00044342	0.00048432	0.00060055	0.0005829	0.00063662
2020	0.000626572	0.00042237	0.00038081	0.00031656	0.00048048	0.00044778	0.00046459	0.00041452	0.00038092	0.00041824	0.00046112	0.00039969	0.0004137	0.00041164	0.00042282	0.00056823	0.00055753	0.00059441
2018	0.000588322	0.00037624	0.0003471	0.00026969	0.00043347	0.00040073	0.00041924	0.00034727	0.0003416	0.0003727	0.00040508	0.00035813	0.00038027	0.0003697	0.00035938	0.00052521	0.00052278	0.00054039
2016	0.000546948	0.00032058	0.00030664	0.00022213	0.00038804	0.00034419	0.00037721	0.00028097	0.00030264	0.00032694	0.00035208	0.00031655	0.00035102	0.00033066	0.00030998	0.00047935	0.0004884	0.00048674
2014	0.000507886	0.00026223	0.00026386	0.000179071	0.00034695	0.00028443	0.0003425	0.00022408	0.00026577	0.00028308	0.000306	0.00028159	0.00032484	0.00029848	0.00027184	0.00043048	0.0004521	0.00043594
2012	0.000466516	0.00020293	0.00021926	0.000141862	0.0003019	0.00022262	0.00030341	0.000172713	0.00022869	0.00023888	0.00025808	0.00024815	0.00028899	0.00026351	0.00023024	0.00036967	0.00039979	0.00037736
2010	0.000421558	0.000151611	0.00017434	0.000113411	0.00024694	0.000163802	0.00025226	0.000126782	0.00019078	0.000193861	0.00020168	0.00021042	0.00023722	0.00021614	0.000179202	0.00029241	0.00032569	0.00030367
2008	0.000385423	0.000125861	0.000136762	9.89439e-05	0.000188301	0.000119847	0.000197025	9.57562e-05	0.000156764	0.000154064	0.00014587	0.000171639	0.00017926	0.000160774	0.000128854	0.00020879	0.00024209	0.00022285
2006	0.000373233	0.000134177	0.00011375	9.80936e-05	0.000138443	9.79454e-05	0.000150315	8.5996e-05	0.00013085	0.000126141	0.000107553	0.000139408	0.000131148	0.000114627	9.51332e-05	0.000138976	0.00016829	0.000152068
2004	0.000385615	0.000164434	0.000103544	0.000101869	0.000105926	9.35672e-05	0.000116357	9.23047e-05	0.000111638	0.000109238	9.39681e-05	0.000115696	0.000102671	9.35516e-05	8.7197e-05	9.99783e-05	0.000116919	0.000105825
2002	0.000409832	0.000196293	9.87248e-05	0.000102057	9.36754e-05	9.95467e-05	9.33052e-05	0.0001057	9.60525e-05	9.72262e-05	9.91954e-05	9.61306e-05	9.52058e-05	9.86115e-05	0.000101515	9.46993e-05	9.07823e-05	9.11e-05
2000	0.000434557	0.00021894	9.5145e-05	9.88437e-05	9.99157e-05	0.000113616	7.9731e-05	0.00012004	8.4075e-05	8.6576e-05	0.00011327	7.5674e-05	0.000103469	0.000115098	0.00012234	0.000109585	8.3196e-05	0.00010491
1558	0.00057095	0.0006359	0.00067459	0.00058413	0.0003506	0.0001517	0.0003612	0.0002929	0.000304	0.00059927	0.00058912	0.0005468	0.00081698	0.00094179	0.00091542	0.00081302	0.00087621	0.00082985
1556	0.00122093	0.00124245	0.00124872	0.00119838	0.00115171	0.00112489	0.00114717	0.00115277	0.00116625	0.00123175	0.00120026	0.00121353	0.00129661	0.00135061	0.00134694	0.00129029	0.00129318	0.00128772
1554	0.00217616	0.00212189	0.00209477	0.00218099	0.00233689	0.00245882	0.00233434	0.00236478	0.00234693	0.00214299	0.00217592	0.0021855	0.00198027	0.00187383	0.00188905	0.00198748	0.001951	0.00198078
1552	0.00294255	0.0028961	0.0028885	0.0030899	0.0033218	0.0034915	0.0033481	0.0033512	0.0033199	0.0030166	0.0031054	0.0030887	0.0027461	0.0025156	0.0025554	0.0027646	0.0027534	0.0027673
1550	0.00343128	0.0034458	0.0034956	0.0037397	0.0039622	0.0040848	0.0039997	0.0039546	0.0039247	0.0036717	0.0037355	0.0037059	0.0033346	0.0030763	0.0031157	0.0033637	0.0034255	0.0033906
1548	0.00369916	0.003783	0.003869	0.0040796	0.004282	0.0043162	0.0042921	0.004229	0.0041996	0.0040612	0.0040233	0.0040007	0.0036527	0.0034776	0.0034667	0.0037188	0.0038497	0.0037716
1546	0.00378734	0.0039528	0.0040074	0.0041308	0.004304	0.0042578	0.0042898	0.0042687	0.0042522	0.0042289	0.0040792	0.0040743	0.0038469	0.0038398	0.003741	0.0039932	0.0041434	0.0040468
1544	0.00361669	0.0039259	0.0038951	0.0038814	0.0039506	0.0038527	0.0039462	0.0039907	0.0040636	0.0041436	0.003925	0.0039195	0.0039854	0.0041871	0.0039925	0.0042269	0.0043435	0.0042425
1542	0.00312594	0.003611	0.0035084	0.0033401	0.0032304	0.0031014	0.0032549	0.0033093	0.0035444	0.0036812	0.0034644	0.0034136	0.0038576	0.0042372	0.003976	0.0041465	0.0041655	0.0040762
1540	0.00260674	0.0031484	0.0030717	0.0028633	0.0026584	0.0025442	0.0027068	0.0026938	0.0030182	0.003104	0.0029616	0.0028363	0.0034013	0.0037797	0.0035416	0.0036361	0.0035462	0.0034906
1538	0.00246833	0.0029076	0.0029043	0.0028148	0.0026969	0.0026628	0.0027744	0.0027177	0.0029519	0.0029326	0.0028835	0.0027316	0.0030679	0.0032806	0.0031356	0.0032162	0.0030908	0.0030658
1536	0.00256117	0.0028702	0.0028711	0.0029097	0.0029101	0.002968	0.0030136	0.0029742	0.0030565	0.0029787	0.0029937	0.0028853	0.0029655	0.003022	0.0029366	0.0030483	0.0029474	0.0029318
1534	0.00269105	0.0028804	0.0028042	0.0028946	0.0029422	0.0030571	0.0030333	0.0030083	0.0029762	0.0028693	0.0029227	0.0029009	0.0028274	0.0027967	0.0027011	0.0028374	0.0027616	0.0027557
1532	0.00294911	0.003003	0.002826	0.0029001	0.0029482	0.0030892	0.0029972	0.0029337	0.00284	0.0026772	0.0027496	0.0028329	0.0026605	0.0025815	0.00244953	0.0025874	0.0025111	0.0025317
1530	0.00353486	0.0033503	0.0030995	0.0030933	0.003141	0.0032983	0.0031715	0.0030251	0.0029178	0.0026802	0.0027438	0.0029143	0.0027015	0.0026018	0.00246817	0.0025876	0.00249965	0.0025347
1528	0.00445722	0.0039386	0.0036181	0.0034255	0.0034546	0.003596	0.0034824	0.0032431	0.0031556	0.0028934	0.0029117	0.0031015	0.0029634	0.002892	0.0027882	0.0028679	0.0027764	0.0027757
1526	0.00604335	0.005095	0.0045348	0.0040124	0.0039359	0.0039575	0.0038621	0.0035357	0.0034592	0.0032615	0.0032016	0.0033033	0.003338	0.0033436	0.0032498	0.0032604	0.0031709	0.0030978
1524	0.00908513	0.007533	0.0064547	0.0054506	0.0051285	0.0048782	0.0047328	0.0043382	0.0041968	0.0041149	0.0039594	0.0038762	0.0040581	0.0041304	0.0040159	0.0039239	0.0038406	0.003716
1522	0.0137866	0.0114017	0.0096381	0.0081121	0.0074098	0.0068223	0.0065357	0.0061097	0.0058093	0.0057882	0.0055406	0.0053003	0.0054735	0.0055181	0.0054102	0.0052003	0.0051495	0.0050193
1520	0.0185188	0.01528	0.012868	0.0110461	0.0099525	0.0090916	0.008665	0.0082265	0.0077815	0.0076906	0.0073808	0.0071466	0.0071808	0.0071144	0.0070656	0.0067684	0.0067878	0.0066395
1518	0.0209851	0.017298	0.014604	0.012753	0.011513	0.010543	0.0100342	0.0096028	0.0091514	0.008909	0.0086141	0.0085031	0.0083813	0.0082274	0.0082321	0.0079248	0.0080202	0.0078258
1516	0.0200621	0.01671	0.014345	0.012787	0.011727	0.0109012	0.0104389	0.0100491	0.0097331	0.0093872	0.0092318	0.0092174	0.008991	0.0088355	0.0088698	0.0086464	0.0087959	0.0086232
1514	0.0166803	0.014351	0.012797	0.011789	0.0111526	0.010663	0.010356	0.0101822	0.010013	0.0096812	0.0097476	0.0097605	0.0095453	0.0094635	0.009549	0.009454	0.0096333	0.0096023
1512	0.0127652	0.011699	0.0110467	0.0105916	0.0104146	0.0103188	0.01022	0.0103609	0.0104053	0.0103113	0.0105723	0.0106079	0.010611	0.0106624	0.0108285	0.0108345	0.0110568	0.0112073
1510	0.00918717	0.0093383	0.0094636	0.0093908	0.0096038	0.0098585	0.0100124	0.010527	0.0108357	0.0111309	0.0114855	0.011605	0.01203	0.012281	0.012495	0.01255	0.012826	0.0131
1508	0.00581043	0.0069206	0.0076527	0.0078337	0.0083483	0.0089102	0.0093827	0.0101493	0.0107731	0.0114849	0.011869	0.012163	0.012995	0.013455	0.013653	0.01377	0.014101	0.014435
1506	0.00309556	0.0044221	0.0054073	0.0058327	0.0065672	0.00732	0.007987	0.0088231	0.0096681	0.0105358	0.0110096	0.0114968	0.012283	0.012784	0.013006	0.013272	0.013661	0.014071
1504	0.00182079	0.0026072	0.0033915	0.0040951	0.0048783	0.0056621	0.0063546	0.0071863	0.0080368	0.008762	0.0093897	0.0099709	0.0103636	0.0107225	0.0110939	0.011521	0.011967	0.012482
1502	0.00137502	0.00145132	0.00191714	0.0027531	0.0034876	0.0042412	0.0049255	0.0058001	0.0065725	0.007151	0.0079014	0.0085095	0.0086644	0.0089173	0.0094628	0.0099931	0.0104928	0.0110838
1500	0.000922748	0.00055334	0.00078025	0.00159346	0.0022918	0.0030235	0.0037625	0.0047543	0.0055098	0.0060956	0.0069404	0.0076074	0.0078153	0.0081106	0.0087999	0.0094339	0.010013	0.0106808

## Sheet: H-IPr·PF₆_TBACl
Wavenumbers [1/cm]	1	2	3	4	5	6	7	8	9	10	11	12	13	14	15	16	17	18
1570	0.00493073	0.00489723	0.00493382	0.00489537	0.00491552	0.00489922	0.00494707	0.00534174	0.00563918	0.00569083	0.00567096	0.00520827	0.00505025	0.00526891	0.00514517	0.00514782	0.00515496	0.00516592				H (M)	G (M)	eq (G/H)
1568	0.0050251	0.00500672	0.00501878	0.00501877	0.0050172	0.00499463	0.00499722	0.00538431	0.00574857	0.00570716	0.00569781	0.00523504	0.00508496	0.00521092	0.0051781	0.00509729	0.00507612	0.00503114			1	0.0484155	0	0
1566	0.0049857	0.00501594	0.00499103	0.00501251	0.00501705	0.00504649	0.00502418	0.00545903	0.0059273	0.00574334	0.00568527	0.00520884	0.00507242	0.00510678	0.00517437	0.00497108	0.00490776	0.00488313			2	0.0484155	0.0215851	0.44583
1564	0.00515763	0.00524435	0.00516395	0.00517211	0.00506739	0.00513722	0.0050854	0.00545006	0.00593152	0.00564595	0.00552569	0.00512546	0.00501819	0.00500278	0.00510704	0.00488053	0.00481626	0.00488241			3	0.0484155	0.0424739	0.877279
1562	0.00593673	0.0060721	0.00589497	0.00580789	0.00531862	0.00530011	0.00513483	0.00508841	0.00533256	0.0051168	0.00500184	0.00489395	0.00490432	0.00485861	0.00490197	0.00489142	0.00499697	0.00514908			4	0.0484155	0.0626995	1.29503
1560	0.00744662	0.0076539	0.0073555	0.007033	0.00592284	0.00561068	0.00523181	0.00441167	0.00413306	0.00422326	0.00424222	0.00460593	0.00487031	0.00478226	0.00464868	0.00509971	0.00561426	0.00577583			5	0.0484155	0.0822931	1.69973
1558	0.00894095	0.0092749	0.008939	0.0083651	0.0069808	0.0063529	0.00585789	0.00451328	0.0038011	0.0042161	0.00446411	0.00505203	0.00549841	0.00539304	0.00506028	0.0058172	0.00669	0.0067718			6	0.0484155	0.101284	2.09197
1556	0.0093864	0.00973	0.0094811	0.0089391	0.0080709	0.0074876	0.0071459	0.0062031	0.00564772	0.0060214	0.0064002	0.0066376	0.0069089	0.0068554	0.0065265	0.0070243	0.0077657	0.0077779			7	0.0484155	0.119699	2.47233
1554	0.00939516	0.0095991	0.0093684	0.0090126	0.0087754	0.0084684	0.0083222	0.0081016	0.0079486	0.0080825	0.0084433	0.0082423	0.0082119	0.0082103	0.0080522	0.0081282	0.0085018	0.0085039			8	0.0484155	0.137565	2.84134
1552	0.00970999	0.0096888	0.0094185	0.0091958	0.0092633	0.009174	0.0091236	0.0093885	0.0094704	0.0094369	0.0096909	0.0092649	0.0090402	0.0090343	0.0090426	0.0088521	0.0089439	0.0089573			9	0.0484155	0.154905	3.19949
1550	0.0103254	0.0100679	0.0097199	0.0095258	0.009674	0.0096463	0.0096316	0.0101205	0.0102436	0.0101588	0.0102715	0.0098087	0.0095415	0.009489	0.0095792	0.0092718	0.0091922	0.009214			10	0.0484155	0.171742	3.54726
1548	0.0111288	0.0106909	0.0102221	0.00997	0.0100887	0.0099715	0.0099644	0.0104554	0.0105074	0.0104245	0.0103798	0.0100002	0.009795	0.009688	0.0097636	0.0094232	0.0093008	0.009331			11	0.0484155	0.188099	3.88509
1546	0.0123772	0.0118129	0.0111524	0.0107666	0.0106915	0.0103739	0.010306	0.0105038	0.0103978	0.0103551	0.0101703	0.0100091	0.0099363	0.0097921	0.0097809	0.0095248	0.0095213	0.0095507			12	0.0484155	0.203994	4.21341
1544	0.0145171	0.0138565	0.0129781	0.0123825	0.0118203	0.01124	0.0110062	0.0105278	0.0101374	0.0102235	0.0099434	0.0101644	0.0102906	0.0101349	0.009976	0.0100118	0.0102866	0.0102933			13	0.0484155	0.219448	4.53261
1542	0.0172082	0.01664	0.015775	0.015045	0.013867	0.0131129	0.0127228	0.0114324	0.0107261	0.0110206	0.010729	0.0113361	0.0116644	0.0115433	0.0111992	0.0116891	0.0122305	0.0121967			14	0.0484155	0.234479	4.84306
1540	0.0181863	0.018206	0.017906	0.017502	0.016321	0.015781	0.015527	0.0141632	0.013497	0.013883	0.0137008	0.0142781	0.0146149	0.0145934	0.0141744	0.0148891	0.015338	0.015279			15	0.0484155	0.249104	5.14512
1538	0.0163192	0.01716	0.017635	0.017939	0.017543	0.017517	0.017639	0.017136	0.016927	0.0172	0.017156	0.017316	0.017451	0.01754	0.017253	0.017745	0.017803	0.017759			16	0.0484155	0.263338	5.43913
1536	0.0136295	0.0149859	0.015919	0.016769	0.017128	0.017489	0.017883	0.018221	0.018434	0.0186	0.01861	0.018469	0.018408	0.018565	0.018455	0.01864	0.018418	0.018401			17	0.0484155	0.277198	5.7254
1534	0.0112451	0.0126942	0.0137369	0.0147793	0.0155	0.016004	0.016487	0.017227	0.017643	0.017804	0.017785	0.017586	0.017397	0.017582	0.01757	0.017579	0.01727	0.017265			18	0.0484155	0.296	6.11375
1532	0.00920647	0.0104247	0.0113402	0.0123038	0.0131134	0.0136009	0.0140697	0.0149075	0.015402	0.015574	0.015519	0.01535	0.015064	0.015237	0.015246	0.015172	0.0148756	0.0148614
1530	0.00771519	0.0085774	0.0092519	0.0100375	0.0108094	0.0112224	0.0116302	0.0124262	0.012942	0.0130693	0.0130604	0.0129023	0.0125654	0.0126885	0.0127001	0.0125765	0.0123423	0.0123059
1528	0.00699981	0.007532	0.007957	0.0085699	0.0091638	0.009467	0.0097568	0.0103653	0.0108082	0.0108755	0.0109976	0.0108545	0.0105729	0.0106292	0.0106384	0.0105409	0.0104376	0.010374
1526	0.00680145	0.0070944	0.0072972	0.007716	0.0079486	0.0080798	0.008189	0.0084169	0.0086426	0.0086952	0.0089454	0.0088795	0.0087681	0.0087697	0.0087314	0.0087827	0.0088599	0.0087538
1524	0.00668951	0.0067508	0.0068165	0.0070235	0.0068545	0.0067866	0.0067204	0.0065182	0.0064649	0.0065302	0.006793	0.0068366	0.0069254	0.0069093	0.0067751	0.0070239	0.0072245	0.0070581
1522	0.00644961	0.0063647	0.0063368	0.0063599	0.0060391	0.00585178	0.00571415	0.0052988	0.0051008	0.00516692	0.0053215	0.00545132	0.00566388	0.00567086	0.00548005	0.00582092	0.0060073	0.00581189
1520	0.00611232	0.0060367	0.00597765	0.00591442	0.00569553	0.00550845	0.00539733	0.00502426	0.00485996	0.00491164	0.00494314	0.00509688	0.00529885	0.00532966	0.00518677	0.00543959	0.00556828	0.00543641
1518	0.00560666	0.00558413	0.00554264	0.00547893	0.00538962	0.0052748	0.00521345	0.00498871	0.00491465	0.00495552	0.00494952	0.00505921	0.00516533	0.00518964	0.0051395	0.00523774	0.00531815	0.00529381
1516	0.00481773	0.00481864	0.00482799	0.00483409	0.00485735	0.00488295	0.00489485	0.00494065	0.00496978	0.00496225	0.00496246	0.00493429	0.00489743	0.00489222	0.00491268	0.00487041	0.00485691	0.00488615
1514	0.00405589	0.00410582	0.00417252	0.00428682	0.00444013	0.00463116	0.0047388	0.00512334	0.00525676	0.00517382	0.00516081	0.00498916	0.00483508	0.00479595	0.00486952	0.00473291	0.00458864	0.00459465

## Sheet: p-CF₃-tren-trisurea_TBANO₃
Wavenumbers [1/cm]	1	2	3	4	5	6	7	8	9	10	11	12	13	14	15	16	17	18	19	20	21
1750	0.00580901	0.005817	0.00590965	0.00583166	0.00579819	0.0061061	0.00588787	0.00592075	0.0060464	0.0063191	0.0062399	0.0063462	0.0063532	0.0064189	0.0064907	0.0064653	0.0066197	0.006582	0.0067988	0.0066716	0.0067577			H (M)	G (M)	eq (G/H)
1748	0.00583287	0.00585547	0.00589888	0.00587418	0.00586841	0.0061609	0.00594248	0.0061074	0.0061148	0.0063492	0.006358	0.0064847	0.0065023	0.0066252	0.0066773	0.0066973	0.0067484	0.0067453	0.007034	0.0069115	0.007025		1	0.0126625	0	0
1746	0.00585355	0.00579615	0.00582198	0.00583913	0.00585021	0.0060425	0.00594197	0.0061459	0.006013	0.0061829	0.0063026	0.006429	0.0063996	0.0065334	0.0066177	0.0066481	0.0066421	0.0066783	0.0069672	0.0068357	0.006977		2	0.0126625	0.000585408	0.0462316
1744	0.00582325	0.00560981	0.00572321	0.0057534	0.00580828	0.00584749	0.00591479	0.0060541	0.00586058	0.0059762	0.0061465	0.0063156	0.0062186	0.0063551	0.0065003	0.0064565	0.0065441	0.006598	0.0067722	0.0066374	0.0068004		3	0.0126625	0.00116694	0.0921569
1742	0.00574457	0.00543352	0.00566685	0.00571496	0.00579981	0.00568066	0.0058671	0.0059335	0.00579536	0.00588863	0.0060015	0.0062199	0.0061007	0.0062323	0.0064044	0.0062507	0.0065303	0.0065611	0.0065832	0.006443	0.0066273		4	0.0126625	0.00174463	0.137779
1740	0.00567044	0.00541187	0.0056793	0.00578956	0.00581822	0.00559186	0.00580839	0.00586378	0.00586194	0.00596428	0.00594909	0.0061526	0.0060693	0.0061686	0.0063292	0.0061417	0.0065186	0.0065074	0.0064717	0.0063036	0.0065186		5	0.0126625	0.00231852	0.183101
1738	0.00564569	0.00552096	0.00574118	0.00592812	0.00584136	0.00559248	0.00578613	0.005867	0.0060017	0.0061231	0.0060176	0.0061452	0.0061317	0.0061846	0.0063557	0.0062556	0.0065058	0.0064775	0.0065217	0.0063123	0.0065707		6	0.0126625	0.00288865	0.228126
1736	0.00570079	0.00567467	0.00584907	0.0060418	0.00590401	0.00571494	0.00586859	0.00596095	0.0061445	0.0062829	0.0062138	0.00625	0.0063498	0.0063531	0.0065962	0.0066164	0.0066003	0.0065899	0.0067685	0.0065446	0.0068475		7	0.0126625	0.00401777	0.317296
1734	0.00587892	0.00589756	0.0060206	0.0061168	0.0060698	0.00598379	0.0060823	0.0061675	0.0062554	0.0064298	0.0065075	0.0064461	0.0067056	0.0066182	0.0069551	0.0069934	0.0067934	0.0068102	0.0070441	0.0068638	0.0071849		8	0.0126625	0.00513227	0.405312
1732	0.00616633	0.0062126	0.0062064	0.0062086	0.0063134	0.0062875	0.0063389	0.0064073	0.0063177	0.0065599	0.0067539	0.0065916	0.0069562	0.0067338	0.0070887	0.0070457	0.0068646	0.0069005	0.0070415	0.0069471	0.0072422		9	0.0126625	0.00623243	0.492195
1730	0.0064746	0.0064988	0.006345	0.0063591	0.0065479	0.0064796	0.0065338	0.0065598	0.0063654	0.0066532	0.0068322	0.0066088	0.0069346	0.0066325	0.0068826	0.0068115	0.0067302	0.006778	0.0067537	0.0067428	0.0069838		10	0.0126625	0.00731854	0.577968
1728	0.00680138	0.006717	0.0065347	0.0066213	0.0068041	0.0066341	0.0067196	0.00669	0.006521	0.0067655	0.0068545	0.0066285	0.0068426	0.0065775	0.0066477	0.0066437	0.0066306	0.0066611	0.0065171	0.0065626	0.0067364		11	0.0126625	0.00839085	0.662652
1726	0.00724947	0.0070417	0.0069689	0.0070986	0.0072108	0.0069722	0.0070486	0.0070148	0.0069322	0.007048	0.0070713	0.0068706	0.0070123	0.0068399	0.0067433	0.006788	0.0068529	0.0068063	0.0066445	0.0067147	0.0067911		12	0.0126625	0.011013	0.869731
1724	0.0078846	0.0076642	0.007732	0.0078536	0.0078569	0.0076379	0.0076393	0.0076964	0.0076644	0.0076463	0.0076702	0.0075027	0.0076273	0.0075128	0.0073414	0.0073274	0.0075332	0.0073694	0.0072799	0.0073508	0.0072838		13	0.0126625	0.0135544	1.07044
1722	0.00872918	0.0086349	0.0087766	0.0088813	0.0088001	0.0086569	0.0085734	0.0087715	0.0087172	0.0086441	0.0087111	0.0086124	0.0087088	0.0086166	0.0084632	0.0083479	0.0087014	0.0084506	0.0084613	0.0085369	0.0083111		14	0.0126625	0.0160189	1.26506
1720	0.00999699	0.0100649	0.0102072	0.0103206	0.0102565	0.0101656	0.010057	0.0103557	0.0102406	0.0101957	0.0103058	0.0103414	0.01036	0.0103251	0.0102016	0.0100808	0.0104739	0.0102083	0.0102867	0.0103956	0.0100703		15	0.0126625	0.0184098	1.45388
1718	0.012187	0.0123378	0.0124234	0.0125603	0.0126021	0.0124986	0.0124288	0.0127358	0.0125656	0.012564	0.0126914	0.0128822	0.0128093	0.0128652	0.0127191	0.0127162	0.0129867	0.0127536	0.0128403	0.0129843	0.0126922		16	0.0126625	0.0207303	1.63714
1716	0.0154668	0.015596	0.015557	0.015705	0.015794	0.015649	0.015615	0.015852	0.015643	0.015638	0.015742	0.015999	0.015861	0.015913	0.015725	0.015819	0.015877	0.015684	0.015724	0.015827	0.015682		17	0.0126625	0.0251725	1.98796
1714	0.0190839	0.019139	0.018956	0.019099	0.019104	0.018939	0.018883	0.019027	0.018789	0.018747	0.018792	0.018995	0.018798	0.01871	0.018508	0.018583	0.018456	0.01832	0.018284	0.018257	0.018239		18	0.0126625	0.029368	2.31928
1712	0.022421	0.022377	0.022125	0.02226	0.022188	0.022015	0.021903	0.02196	0.021722	0.021645	0.021632	0.021727	0.021467	0.02125	0.021014	0.02106	0.020799	0.020744	0.020643	0.020481	0.020491		19	0.0126625	0.0333366	2.6327
1710	0.0256022	0.025454	0.025226	0.025354	0.025325	0.025133	0.024963	0.024963	0.024776	0.024672	0.024644	0.02461	0.024321	0.024096	0.023769	0.023858	0.023507	0.023504	0.023388	0.023149	0.023111		20	0.0126625	0.0370964	2.92962
1708	0.0287657	0.028567	0.028398	0.028521	0.028615	0.028413	0.028204	0.028202	0.028103	0.027992	0.028023	0.027857	0.027589	0.027462	0.027052	0.027202	0.026849	0.026816	0.026753	0.026499	0.026376		21	0.0126625	0.0406633	3.21132
1706	0.0317239	0.031578	0.031481	0.03159	0.03178	0.031617	0.031407	0.03146	0.031441	0.031375	0.031529	0.031297	0.031083	0.031106	0.03072	0.03087	0.030622	0.030518	0.030545	0.030322	0.03011
1704	0.0342058	0.034204	0.034232	0.034307	0.034543	0.034481	0.034327	0.034444	0.034487	0.034528	0.034823	0.034659	0.034545	0.034767	0.034508	0.034615	0.034522	0.034424	0.03452	0.034362	0.034103
1702	0.0358784	0.036078	0.036296	0.036342	0.036629	0.036716	0.036672	0.036815	0.036956	0.037127	0.037556	0.037556	0.037668	0.038151	0.038027	0.038138	0.038188	0.038238	0.038371	0.038296	0.038089
1700	0.0361074	0.036533	0.036904	0.037009	0.037347	0.037588	0.037679	0.037826	0.038157	0.038422	0.038974	0.03913	0.039612	0.040334	0.04031	0.040498	0.040706	0.040965	0.041153	0.041148	0.041096
1698	0.0344682	0.035039	0.035429	0.035705	0.036009	0.03633	0.036529	0.036734	0.037276	0.037584	0.038217	0.038495	0.039303	0.040072	0.040167	0.040434	0.040845	0.041249	0.041523	0.041552	0.041674
1696	0.0315909	0.032108	0.032446	0.032852	0.033052	0.033329	0.033568	0.033924	0.03454	0.034874	0.035469	0.035874	0.03677	0.037372	0.037601	0.03791	0.038462	0.038935	0.03924	0.039319	0.039522
1694	0.0285664	0.028895	0.029192	0.029551	0.029686	0.029851	0.030065	0.030578	0.0311	0.031456	0.031877	0.032366	0.033164	0.033536	0.033817	0.034156	0.034674	0.035189	0.035421	0.035617	0.035777
1692	0.0260421	0.026231	0.026466	0.026658	0.026791	0.026871	0.027031	0.027578	0.027948	0.028305	0.028505	0.028949	0.029599	0.029793	0.030026	0.030374	0.030727	0.031245	0.031362	0.031692	0.031718
1690	0.0242569	0.024431	0.02457	0.024602	0.024744	0.024797	0.024901	0.025317	0.025559	0.025904	0.025945	0.026233	0.026725	0.026816	0.026969	0.027277	0.027454	0.027897	0.027939	0.028317	0.028185
1688	0.0232373	0.023437	0.023532	0.023457	0.023589	0.023623	0.023677	0.023865	0.023984	0.024328	0.024326	0.024431	0.024744	0.024792	0.02487	0.025087	0.025135	0.025423	0.025436	0.025723	0.025496
1686	0.0228245	0.022959	0.023144	0.022993	0.0231	0.023044	0.023041	0.023051	0.022979	0.023334	0.023377	0.023303	0.023431	0.023458	0.023428	0.023524	0.023471	0.023538	0.023504	0.023596	0.023411
1684	0.022646	0.022606	0.022934	0.022749	0.022804	0.022567	0.022516	0.022477	0.022169	0.022498	0.022566	0.022285	0.022259	0.022217	0.022025	0.021968	0.02182	0.021633	0.021468	0.021404	0.021337
1682	0.0222792	0.022095	0.022426	0.022293	0.02226	0.021861	0.021808	0.021726	0.021307	0.021517	0.021512	0.021024	0.020873	0.020682	0.020377	0.020126	0.019917	0.01953	0.01919	0.019129	0.019063
1680	0.0215553	0.021333	0.021539	0.02149	0.021374	0.020933	0.020913	0.020668	0.020315	0.020356	0.02024	0.019645	0.019371	0.019019	0.018742	0.018308	0.018078	0.017622	0.017163	0.017199	0.016976
1678	0.0204689	0.020275	0.020378	0.020333	0.020177	0.019798	0.019776	0.019361	0.019112	0.019011	0.018848	0.018266	0.017898	0.017444	0.017285	0.016759	0.016496	0.0161	0.015613	0.015712	0.015336
1676	0.01908	0.018963	0.01903	0.018891	0.018713	0.018455	0.018345	0.017944	0.017708	0.017535	0.017433	0.016904	0.016512	0.016046	0.015995	0.015519	0.015165	0.0148972	0.0144636	0.0145357	0.0141402
1674	0.0175948	0.017605	0.017636	0.017414	0.017192	0.017056	0.0168	0.016637	0.016332	0.016141	0.016185	0.015673	0.01531	0.0149331	0.0149034	0.0146055	0.0141339	0.0139578	0.0136395	0.013604	0.0133244
1672	0.0161951	0.016319	0.016251	0.016078	0.015809	0.015735	0.015384	0.015488	0.015153	0.0149472	0.015131	0.0146091	0.0142655	0.0140559	0.0139507	0.0138456	0.0133284	0.0131382	0.0129511	0.0127922	0.012658
1670	0.0147993	0.0149372	0.0147279	0.014703	0.0144522	0.0143668	0.0140457	0.0142511	0.0139891	0.013775	0.0139717	0.0134754	0.0131424	0.0130969	0.012884	0.0128578	0.0124249	0.0121526	0.0120442	0.0118259	0.0117818
1668	0.0133266	0.0134104	0.0130621	0.0131685	0.0129973	0.0128904	0.0126619	0.0128448	0.0126891	0.0125365	0.0125803	0.0121647	0.0118875	0.0119178	0.0116429	0.0115597	0.0112881	0.0109629	0.0108525	0.0106593	0.010643
1666	0.0119767	0.0120345	0.0115802	0.0117747	0.0116624	0.0115733	0.0114051	0.0115801	0.0114868	0.011472	0.0112956	0.0109716	0.0107963	0.0107983	0.0105256	0.0103413	0.0102136	0.0099087	0.0097606	0.0096244	0.0095911
1664	0.0109589	0.0110223	0.0105417	0.0108013	0.0106971	0.0106264	0.0104823	0.0106879	0.0106112	0.0107125	0.0104026	0.0101469	0.0100575	0.0099808	0.0097283	0.0095039	0.0094521	0.0092215	0.0090619	0.0089592	0.0088839
1662	0.010227	0.010252	0.009862	0.0101107	0.0100215	0.0098946	0.0098139	0.010022	0.0099327	0.0100391	0.0097522	0.0095502	0.0094966	0.0093536	0.0090912	0.0089155	0.0088698	0.0087376	0.0085976	0.0085118	0.008411
1660	0.00964973	0.0095846	0.0093664	0.0094588	0.0094351	0.0091759	0.0092383	0.0093942	0.009258	0.0092985	0.009117	0.0089785	0.0089482	0.0087744	0.0084921	0.0083932	0.0083075	0.0082801	0.0081385	0.0081011	0.00802
1658	0.00921684	0.0090935	0.0090552	0.0088979	0.0089568	0.0085704	0.0088035	0.0088849	0.0086892	0.0086967	0.0086002	0.0085416	0.0085789	0.0083902	0.0081497	0.008098	0.0079596	0.0080327	0.0078395	0.0078909	0.0078394
1656	0.00890961	0.0088117	0.0089403	0.0085897	0.0086933	0.008261	0.0086072	0.0086193	0.0084225	0.0084488	0.0084147	0.0084382	0.0086044	0.0083862	0.0082896	0.008273	0.0081059	0.0082632	0.0080107	0.0081345	0.0080557
1654	0.00853663	0.0085231	0.0088096	0.0084479	0.0085333	0.0081679	0.0085109	0.008484	0.0083954	0.008413	0.0084842	0.0085677	0.0088805	0.0086045	0.0087025	0.0087569	0.0086286	0.0088254	0.0085851	0.0086916	0.0085048
1652	0.00795543	0.0080558	0.0084147	0.0081969	0.0082024	0.0079921	0.0082307	0.0082502	0.0082944	0.0082407	0.0084343	0.0085516	0.0089223	0.0085929	0.0088026	0.0089226	0.0089129	0.0090686	0.0089363	0.0089382	0.0086399
1650	0.00745455	0.0077152	0.0079719	0.0078729	0.0077591	0.0077014	0.007839	0.0079806	0.0080451	0.0079701	0.0081641	0.0083188	0.0086131	0.0082976	0.0084993	0.0085618	0.008672	0.008732	0.0087129	0.0086255	0.0083196
1648	0.00730035	0.0077285	0.0077816	0.0077163	0.0074738	0.0075019	0.0075978	0.0078188	0.0078478	0.0078585	0.007929	0.008109	0.0082929	0.0080588	0.0082457	0.0081472	0.0083051	0.008282	0.0083248	0.0082025	0.007971
1646	0.00732879	0.0077959	0.0076664	0.007627	0.0072826	0.0073291	0.0074109	0.0075851	0.0076523	0.0077581	0.0077141	0.0078276	0.0079594	0.0078143	0.0080172	0.0077822	0.0079178	0.0078557	0.0079425	0.0078021	0.0076408
1644	0.00730745	0.0076008	0.0073756	0.007377	0.0070028	0.0070366	0.007096	0.0071242	0.0072992	0.0074254	0.0073503	0.0072885	0.0074307	0.0073323	0.00751	0.0072402	0.0073106	0.0072592	0.0073838	0.0072465	0.007092
1642	0.00723108	0.0072673	0.0070495	0.0070463	0.0067272	0.0067764	0.0068028	0.006683	0.0069337	0.0070434	0.0069763	0.0067661	0.0069312	0.0068463	0.0069356	0.0066911	0.0066859	0.0066766	0.006808	0.0067287	0.0065186
1640	0.00719056	0.0070967	0.0069624	0.0068767	0.0066593	0.0067786	0.0067831	0.0065582	0.0068232	0.0069538	0.0068788	0.0066764	0.0068477	0.0067878	0.0068148	0.0065746	0.0065156	0.0065396	0.0066543	0.0066639	0.0064056
1638	0.00716355	0.00713	0.0070924	0.0068947	0.0067672	0.0069786	0.0069958	0.0066848	0.0069488	0.0071372	0.007062	0.0069896	0.0071578	0.0071484	0.0072142	0.0069445	0.0068854	0.0068978	0.0070113	0.0070616	0.0068523
1636	0.00711789	0.0072301	0.0072004	0.0069627	0.0068374	0.0070976	0.0071637	0.0067865	0.0070404	0.0072682	0.0072422	0.0072679	0.0074193	0.0074468	0.0076115	0.007315	0.0073396	0.0072946	0.0074318	0.0074095	0.0073761
1634	0.0071898	0.0073496	0.007207	0.007047	0.0068053	0.0070415	0.0071385	0.0067672	0.0069659	0.007185	0.0072012	0.0071998	0.0072999	0.0072995	0.0074959	0.007178	0.0073378	0.0072595	0.0073944	0.0072343	0.0073706
1632	0.00747009	0.0075479	0.0073245	0.0072377	0.0068735	0.0070683	0.0071221	0.0068292	0.00698	0.0071638	0.0071202	0.0070953	0.0071371	0.0070537	0.007219	0.0068407	0.0070897	0.0070673	0.0071477	0.0069064	0.0070538
1630	0.0078116	0.0077994	0.0076335	0.0075005	0.0071211	0.0072886	0.0072524	0.0070572	0.0072591	0.0073803	0.0071999	0.0072758	0.007304	0.0071102	0.0073096	0.0068415	0.0070977	0.0071874	0.0072011	0.0069557	0.0070028
1628	0.00812742	0.0080832	0.0080501	0.007777	0.0074942	0.0076098	0.007501	0.0074075	0.0077364	0.0077582	0.0074529	0.0076945	0.0077682	0.0074313	0.0077604	0.0072532	0.007458	0.0076445	0.0076005	0.0073932	0.0073359
1626	0.00859969	0.0085568	0.0086145	0.0082229	0.0080843	0.008092	0.0079613	0.0079876	0.0083686	0.0083024	0.0079651	0.0082878	0.0084308	0.0079465	0.0083837	0.0079612	0.0080959	0.0083079	0.0082014	0.00806	0.0079452
1624	0.00950375	0.0094447	0.0095261	0.0091125	0.0090996	0.0089864	0.0088393	0.0090062	0.0092531	0.0091804	0.0089314	0.0091819	0.0093598	0.0088204	0.0092208	0.0089607	0.0090603	0.0092268	0.0090592	0.0089925	0.0088672
1622	0.0108267	0.0107379	0.0108443	0.0104478	0.0105335	0.0103592	0.0101317	0.0104475	0.0104707	0.0104509	0.0103652	0.0104775	0.0106339	0.0101969	0.0104598	0.0103209	0.0104425	0.0105486	0.0103653	0.0103382	0.0102426
1620	0.0123088	0.0122135	0.0123482	0.0119462	0.0120916	0.011947	0.0115938	0.0120379	0.0118975	0.0119222	0.0120042	0.0120064	0.012094	0.0118845	0.0120143	0.0119339	0.0120894	0.0121658	0.0120395	0.0119788	0.0119527
1618	0.0136879	0.0135904	0.0136928	0.0133006	0.0134013	0.0133606	0.0129499	0.0134308	0.0132208	0.0132766	0.013457	0.0133963	0.0133888	0.0134176	0.0134334	0.0134284	0.0135426	0.013627	0.0136059	0.0134429	0.0134858
1616	0.0148738	0.0147039	0.0147545	0.0144165	0.0143627	0.0144247	0.0141097	0.0144842	0.0142531	0.0143509	0.0145302	0.014433	0.0143708	0.0144868	0.0143935	0.014518	0.0144864	0.0145804	0.0146567	0.0143868	0.0144289
1614	0.016105	0.015801	0.015906	0.015577	0.015402	0.015469	0.015331	0.01554	0.01532	0.015431	0.015566	0.015433	0.015423	0.015409	0.015275	0.015488	0.015315	0.015359	0.015502	0.015194	0.015163
1612	0.017817	0.017445	0.017682	0.017261	0.017119	0.01708	0.017066	0.017185	0.017023	0.01707	0.017165	0.016995	0.017101	0.016848	0.016801	0.016965	0.016784	0.016699	0.016889	0.016623	0.016513
1610	0.0203329	0.020035	0.020318	0.019819	0.019818	0.019649	0.019658	0.019779	0.019708	0.019648	0.019691	0.019523	0.019679	0.019263	0.019358	0.019377	0.019325	0.019086	0.019313	0.019118	0.018969
1608	0.023534	0.023368	0.023548	0.023131	0.023235	0.023024	0.023009	0.023121	0.023128	0.022997	0.022982	0.022892	0.022963	0.022567	0.022729	0.022633	0.022739	0.022413	0.022671	0.022503	0.022357
1606	0.02661	0.026495	0.026548	0.026318	0.026413	0.026265	0.026257	0.02629	0.026335	0.026179	0.026172	0.026209	0.026133	0.025892	0.026026	0.025904	0.026093	0.025781	0.026086	0.025866	0.025765
1604	0.0282387	0.028094	0.028111	0.027964	0.027993	0.02791	0.027949	0.027928	0.02795	0.027777	0.027877	0.027988	0.027846	0.027739	0.027865	0.027735	0.027934	0.02768	0.02803	0.027738	0.027736
1602	0.0274449	0.027312	0.027325	0.027079	0.027086	0.026975	0.027037	0.027098	0.027027	0.026862	0.027055	0.027122	0.027042	0.02695	0.027152	0.026969	0.027154	0.02693	0.027257	0.026968	0.027096
1600	0.0245891	0.024548	0.024477	0.02413	0.024173	0.023973	0.023981	0.024194	0.024002	0.02393	0.024089	0.024031	0.024059	0.023916	0.024173	0.023955	0.024112	0.023881	0.024086	0.023888	0.024117
1598	0.0209934	0.021029	0.020815	0.020536	0.02059	0.020351	0.020242	0.020509	0.020272	0.020345	0.020414	0.020218	0.020314	0.020163	0.020327	0.020192	0.020289	0.020047	0.020101	0.020002	0.020258
1596	0.017667	0.017699	0.01739	0.01728	0.017244	0.01708	0.016848	0.017034	0.016865	0.017021	0.017108	0.016774	0.016901	0.016819	0.01677	0.016785	0.016826	0.016566	0.016542	0.016483	0.016694
1594	0.0149727	0.0149753	0.0146637	0.0146482	0.0144492	0.0144274	0.014107	0.0142214	0.0141248	0.0142521	0.0144867	0.0140082	0.0141742	0.014168	0.0139441	0.0140027	0.014061	0.013754	0.0137692	0.013688	0.0138171
1592	0.0130022	0.0130143	0.0127493	0.0127085	0.0123905	0.0124741	0.0121239	0.0122931	0.0121393	0.0122165	0.0125566	0.0119717	0.0121949	0.0121759	0.011945	0.0118603	0.0120003	0.0116573	0.0117715	0.0116248	0.0116753
1590	0.0117226	0.0117401	0.011536	0.0114377	0.0111305	0.0112085	0.0109074	0.0111912	0.010887	0.0109739	0.0112609	0.0106569	0.0109102	0.010772	0.0106835	0.0104026	0.0105893	0.0102923	0.0104789	0.0102364	0.0102256
1588	0.0110017	0.0109512	0.0108215	0.0106591	0.0104634	0.0104327	0.0102516	0.0105684	0.0101793	0.0103039	0.0104498	0.0098926	0.0101035	0.0098235	0.0098928	0.009551	0.0096842	0.0095096	0.0096969	0.0093679	0.0092964
1586	0.0107515	0.0105869	0.0105263	0.0102284	0.0101411	0.0099887	0.0099142	0.0101507	0.0098099	0.009941	0.0099697	0.0094671	0.009581	0.0092416	0.0093423	0.0091206	0.0091472	0.0090628	0.0091914	0.008854	0.0087106
1584	0.0109192	0.0106914	0.01066	0.0101645	0.0101033	0.0099305	0.0098395	0.009976	0.0097209	0.0098486	0.009794	0.0093407	0.0093844	0.0090826	0.0090558	0.009023	0.0089803	0.0088664	0.0089321	0.0086756	0.0084711
1582	0.0113227	0.0111297	0.0110954	0.0104656	0.0103511	0.0102857	0.0100631	0.0101596	0.009926	0.0100936	0.0099545	0.009579	0.009626	0.0093816	0.0091798	0.0092794	0.0092259	0.0090138	0.0090571	0.0088923	0.0086651
1580	0.0117015	0.0116199	0.0115872	0.0109818	0.0107861	0.0108664	0.0105346	0.0106357	0.0103749	0.010613	0.0104129	0.0101491	0.0102191	0.0100086	0.0097207	0.0098508	0.0098007	0.0095471	0.0095864	0.0094629	0.0092414

## Sheet: p-CF₃-tren-trisurea_TBAHSO₄
Wavenumbers [1/cm]	1	2	3	4	5	6	7	8	9	10	11	12	13	14	15	16	17	18	19	20	21
1750	0.0203988	0.0204159	0.0205665	0.0201465	0.0200804	0.0204206	0.0202834	0.0201344	0.0206302	0.0201318	0.0200593	0.0203818	0.020439	0.0203875	0.020524	0.0205146	0.0206915	0.020665	0.0205669	0.0208163	0.0207266			H (M)	G (M)	eq (G/H)
1748	0.0204688	0.0203269	0.0205106	0.0203031	0.0202619	0.0204669	0.0204434	0.020314	0.0206423	0.020209	0.0199289	0.0204205	0.0204836	0.0204502	0.0205261	0.0205604	0.0207748	0.0206464	0.0205926	0.0210001	0.0207748		1	0.0124647	0	0
1746	0.0205517	0.0203419	0.0204771	0.0204845	0.020506	0.0205673	0.0205799	0.0205088	0.0206085	0.0203845	0.019999	0.0204797	0.0206125	0.0205066	0.0205429	0.0205521	0.0208056	0.020531	0.0206903	0.0211302	0.020736		2	0.0124647	0.000322412	0.025866
1744	0.0205036	0.0203314	0.0204425	0.0205244	0.0205478	0.0205439	0.0205566	0.0205357	0.0205176	0.0204707	0.0201386	0.0204071	0.0206376	0.020452	0.020571	0.0204888	0.0207701	0.0203921	0.0207513	0.0211527	0.0206338		3	0.0124647	0.000642688	0.0515608
1742	0.0204319	0.0203444	0.0204442	0.0204683	0.0204152	0.0204647	0.0205056	0.0204566	0.0204845	0.0204774	0.0202953	0.0203021	0.0205383	0.0203866	0.020662	0.0204478	0.0207276	0.0203459	0.0207442	0.0211062	0.0205869		4	0.0124647	0.000960851	0.0770859
1740	0.0205025	0.0204899	0.0205264	0.0204529	0.020309	0.0204754	0.0205368	0.0204145	0.0205934	0.0205208	0.0204531	0.0203004	0.0204299	0.0204405	0.0208009	0.0205058	0.0207485	0.0204257	0.0207096	0.0210269	0.0206759		5	0.0124647	0.00127692	0.102443
1738	0.0206425	0.0206577	0.0206109	0.0204624	0.0202713	0.0205026	0.0204761	0.0203793	0.0207041	0.020563	0.0204877	0.0203089	0.0203196	0.0205432	0.0208562	0.020653	0.0208142	0.0205085	0.0206606	0.0208901	0.0207997		6	0.0124647	0.00159092	0.127634
1736	0.0206837	0.0206668	0.0206153	0.0204174	0.0202338	0.0204183	0.0201769	0.0202762	0.0206557	0.0204953	0.020314	0.0201997	0.0201548	0.0205644	0.0207765	0.0208445	0.0208644	0.0205178	0.0206257	0.0207224	0.0208244		7	0.0124647	0.00221277	0.177524
1734	0.0207052	0.0206409	0.0206726	0.0204486	0.0203369	0.0204125	0.0199635	0.0202956	0.0206203	0.0204509	0.0201762	0.0201787	0.0201292	0.0206077	0.0207556	0.0210868	0.020956	0.020629	0.020769	0.02072	0.0208463		8	0.0124647	0.00282658	0.226767
1732	0.0209468	0.0209161	0.0209927	0.0207864	0.0208092	0.0208069	0.020328	0.0207211	0.0209482	0.0207195	0.0204882	0.0206046	0.0205636	0.0209094	0.0210203	0.0213837	0.0212361	0.0210497	0.0212269	0.0210495	0.021103		9	0.0124647	0.00343249	0.275378
1730	0.021378	0.0214799	0.0214816	0.0213421	0.0214943	0.0214605	0.0211122	0.0214003	0.0215556	0.0212457	0.021202	0.0213591	0.0213216	0.0214067	0.0214645	0.021675	0.0216789	0.0216179	0.0218294	0.0215573	0.0215468		10	0.0124647	0.00403066	0.323367
1728	0.0218266	0.0220779	0.0219417	0.0218831	0.0220904	0.0220379	0.0218434	0.0219892	0.0220911	0.0217626	0.0219419	0.0220538	0.02199	0.0218777	0.0218888	0.0219533	0.0221233	0.022079	0.0223699	0.0220468	0.0219481		11	0.0124647	0.00462123	0.370747
1726	0.0223348	0.0226825	0.0224292	0.0224022	0.022592	0.022556	0.0224563	0.0224494	0.0224991	0.0222471	0.022568	0.0225912	0.0224437	0.022329	0.0223297	0.0223259	0.0225317	0.0224775	0.0228843	0.0225579	0.0223095		12	0.0124647	0.00606537	0.486605
1724	0.0230623	0.0234287	0.0231377	0.0230301	0.0231778	0.0232448	0.0231599	0.0229742	0.0229923	0.0228598	0.0231886	0.023135	0.0228626	0.0229511	0.0229484	0.0229341	0.0230509	0.0230468	0.0235261	0.0232279	0.0228765		13	0.0124647	0.00746507	0.598898
1722	0.0241196	0.0244155	0.0241906	0.0238969	0.0239996	0.0242346	0.0241017	0.0237615	0.0237753	0.023724	0.0239852	0.0238991	0.0235212	0.0239368	0.0238948	0.0239226	0.0239524	0.0239972	0.0244423	0.0241801	0.0239206		14	0.0124647	0.00882236	0.707789
1720	0.0257658	0.0258799	0.0257892	0.0253035	0.025322	0.0256741	0.0254871	0.0250895	0.025071	0.0250372	0.0252792	0.0252026	0.0247843	0.0255454	0.0254544	0.0255912	0.0256228	0.0255973	0.0259238	0.0257023	0.0257061		15	0.0124647	0.0101391	0.813429
1718	0.0285706	0.0284103	0.0284167	0.0278468	0.027714	0.0280088	0.0278256	0.0274718	0.027317	0.0272675	0.0276185	0.0275741	0.0271911	0.0281869	0.0281194	0.0284031	0.0284734	0.0283012	0.0285131	0.0283391	0.0285536		16	0.0124647	0.0114172	0.915962
1716	0.0326221	0.032234	0.032215	0.031659	0.031371	0.031446	0.031297	0.03102	0.03065	0.030551	0.031084	0.031094	0.030827	0.031808	0.031839	0.032237	0.032281	0.032117	0.0323	0.032165	0.032346		17	0.0124647	0.0138637	1.11224
1714	0.0367613	0.036319	0.036228	0.035637	0.035259	0.035135	0.034905	0.034677	0.034158	0.033916	0.034566	0.034686	0.034618	0.035392	0.035469	0.035945	0.035928	0.036004	0.036228	0.036135	0.03617		18	0.0124647	0.0161743	1.29761
1712	0.0400933	0.039687	0.039587	0.038858	0.038413	0.038217	0.03772	0.03747	0.036949	0.036457	0.037117	0.037435	0.037632	0.038219	0.038237	0.038817	0.038817	0.039158	0.039413	0.039419	0.039417		19	0.0124647	0.01836	1.47297
1710	0.0428629	0.04245	0.042355	0.041478	0.040943	0.040749	0.039883	0.039468	0.03907	0.038315	0.038892	0.039484	0.039966	0.040482	0.040437	0.041119	0.041231	0.041716	0.041963	0.042125	0.042189		20	0.0124647	0.0204307	1.63909
1708	0.0454915	0.045008	0.044819	0.04387	0.043277	0.043087	0.041892	0.041164	0.040953	0.040066	0.040464	0.041355	0.042036	0.042546	0.042558	0.043239	0.043483	0.043995	0.044219	0.044485	0.044608		21	0.0124647	0.0223952	1.7967
1706	0.0479912	0.047439	0.047063	0.046123	0.045582	0.045377	0.044014	0.043004	0.042955	0.042139	0.042292	0.043421	0.044102	0.044604	0.044824	0.045363	0.045654	0.04611	0.046328	0.04652	0.046652
1704	0.0500662	0.049518	0.048999	0.048127	0.047745	0.047535	0.04621	0.045206	0.045216	0.044598	0.044515	0.045749	0.046239	0.046707	0.04719	0.047537	0.047722	0.048025	0.048261	0.048213	0.048336
1702	0.0512686	0.050835	0.050334	0.049625	0.049449	0.049287	0.048219	0.047627	0.04761	0.04717	0.046922	0.048064	0.048323	0.048702	0.049343	0.049577	0.049498	0.049542	0.04978	0.049491	0.04959
1700	0.051034	0.050873	0.050519	0.050119	0.050192	0.050165	0.049582	0.049697	0.049721	0.049352	0.049031	0.049829	0.049944	0.050119	0.050692	0.050915	0.050514	0.050284	0.050426	0.050088	0.050081
1698	0.0491444	0.049421	0.049241	0.049225	0.049599	0.049786	0.049836	0.050675	0.050936	0.050574	0.050273	0.05055	0.050501	0.050419	0.050724	0.050934	0.050323	0.049976	0.049892	0.049744	0.049537
1696	0.0462013	0.046956	0.046952	0.047241	0.047849	0.048274	0.048904	0.050205	0.050793	0.050462	0.050265	0.050061	0.049644	0.049437	0.049462	0.049559	0.048907	0.048647	0.048321	0.048446	0.048051
1694	0.0430938	0.044182	0.044368	0.044826	0.04546	0.046091	0.047076	0.048453	0.049239	0.048988	0.048926	0.048385	0.047531	0.047355	0.047209	0.04714	0.046511	0.046425	0.045994	0.046288	0.045801
1692	0.0404577	0.041634	0.041956	0.042467	0.042943	0.043716	0.044774	0.045892	0.046668	0.046524	0.046543	0.045759	0.044717	0.044544	0.044334	0.044149	0.043541	0.043607	0.04321	0.043512	0.043028
1690	0.0386387	0.039646	0.039972	0.04042	0.040679	0.041506	0.04237	0.043064	0.043674	0.043631	0.043646	0.042662	0.041787	0.041488	0.041291	0.041098	0.040514	0.040693	0.040336	0.040551	0.040137
1688	0.0376467	0.038245	0.038439	0.038698	0.038751	0.039519	0.03995	0.040217	0.040569	0.040548	0.040521	0.039404	0.03888	0.038439	0.03832	0.038213	0.037651	0.037922	0.037493	0.037637	0.037327
1686	0.0371686	0.037201	0.037175	0.037135	0.036978	0.037549	0.037351	0.037248	0.037291	0.037101	0.037076	0.035948	0.035694	0.035295	0.035274	0.035288	0.034693	0.035037	0.034465	0.034628	0.034388
1684	0.0367672	0.036329	0.036078	0.035706	0.035352	0.035593	0.034746	0.034326	0.034054	0.033501	0.033541	0.032522	0.032315	0.032143	0.032128	0.032246	0.03156	0.031904	0.031349	0.031564	0.031284
1682	0.0362404	0.03569	0.035286	0.034647	0.034224	0.034094	0.032859	0.032204	0.031641	0.030812	0.030859	0.0299927	0.0297258	0.0296624	0.0295153	0.0297247	0.0289997	0.0292441	0.0289687	0.0291376	0.0287687
1680	0.0356009	0.035181	0.034715	0.033901	0.033574	0.033128	0.031842	0.031062	0.030229	0.0294413	0.0293406	0.0286327	0.028351	0.0281592	0.027861	0.0281611	0.0275153	0.0276471	0.0276639	0.0276988	0.0273539
1678	0.0347152	0.034388	0.03394	0.033036	0.032852	0.032177	0.031054	0.030209	0.0291625	0.0286201	0.0282855	0.0277617	0.0275068	0.027183	0.0268218	0.0271633	0.0266363	0.0267373	0.0268485	0.0267725	0.0265925
1676	0.0334336	0.033059	0.032685	0.031795	0.031662	0.030878	0.030012	0.0291183	0.0279938	0.0276487	0.0271456	0.0268092	0.0265988	0.0263357	0.0259979	0.0262867	0.0258301	0.0259773	0.0260331	0.0259246	0.0259117
1674	0.0319015	0.031431	0.031131	0.030349	0.030141	0.0293882	0.028764	0.0278873	0.026846	0.0264978	0.0260157	0.0257872	0.0256655	0.0255865	0.0252993	0.0255083	0.0250684	0.0252441	0.0252673	0.0251936	0.0251718
1672	0.030454	0.0299814	0.0296817	0.0290334	0.0287422	0.0280968	0.0276048	0.0269044	0.0259923	0.0255254	0.0252182	0.0249954	0.0249868	0.0249821	0.0247288	0.0249697	0.0245624	0.0246734	0.0247639	0.0247635	0.0245459
1670	0.0291986	0.0288274	0.0284593	0.0279193	0.027691	0.0271082	0.026637	0.026224	0.0253663	0.0248847	0.0247023	0.0244865	0.024516	0.0244005	0.024176	0.024552	0.0242502	0.0242475	0.0244144	0.0244897	0.0241087
1668	0.0280326	0.0277568	0.0273277	0.0268958	0.0268533	0.0262604	0.0257925	0.0255909	0.0247489	0.0244393	0.0241818	0.0240633	0.0240261	0.0237731	0.0236063	0.0240186	0.0238918	0.0238083	0.0239835	0.0240778	0.023744
1666	0.0269578	0.0267118	0.0262748	0.0259766	0.026064	0.0254787	0.0250874	0.0249136	0.0241383	0.0240869	0.0236251	0.0236485	0.0235358	0.0232445	0.0231729	0.0233861	0.0234829	0.0233421	0.0235092	0.023525	0.0233754
1664	0.0260262	0.0257972	0.025372	0.025196	0.0252405	0.0247725	0.0245479	0.0242797	0.0236125	0.0237761	0.0231832	0.0232912	0.0231697	0.022908	0.0229338	0.0228194	0.0231568	0.0229332	0.0231405	0.0230138	0.0230071
1662	0.0251845	0.0250224	0.0245772	0.0244603	0.024358	0.0241081	0.0240709	0.0237096	0.0231335	0.0233893	0.0228763	0.0229653	0.0228668	0.0226441	0.022707	0.0223691	0.0228886	0.0225742	0.0228557	0.0225987	0.0226352
1660	0.0243962	0.0243169	0.0238318	0.0237126	0.0235195	0.0234799	0.0235367	0.02316	0.0226704	0.0228706	0.0225934	0.022589	0.0224959	0.0223277	0.0223545	0.0220142	0.0225774	0.0222259	0.0225657	0.0222285	0.0222796
1658	0.023739	0.023662	0.0231819	0.023043	0.0228746	0.022938	0.0229246	0.0226239	0.0222743	0.0223278	0.02226	0.0221437	0.0220687	0.0219894	0.0219941	0.0217972	0.0222624	0.0219511	0.0222939	0.0219171	0.0219983
1656	0.0232488	0.023045	0.0226542	0.0225175	0.0224108	0.0224701	0.0222267	0.0220749	0.0219182	0.0218632	0.021848	0.021645	0.0216406	0.0216736	0.0217833	0.0217541	0.0220323	0.0218359	0.0220721	0.0217071	0.0217873
1654	0.0228364	0.0224282	0.0221719	0.0220916	0.0219714	0.02202	0.0214614	0.0214685	0.0214683	0.0214696	0.0213734	0.0211425	0.0211961	0.0213565	0.021696	0.0217957	0.0218575	0.0218572	0.0218338	0.0215643	0.0215755
1652	0.0224708	0.0219281	0.0217139	0.0217679	0.0215304	0.0216896	0.0209091	0.0209824	0.0209964	0.0211678	0.0210512	0.0208585	0.0208279	0.0211291	0.0216073	0.0217754	0.0216824	0.0218843	0.0216087	0.0214476	0.0214115
1650	0.0222916	0.0217759	0.0214172	0.0216359	0.0212859	0.0216301	0.0208897	0.0209366	0.0208563	0.0210574	0.0211041	0.0209785	0.0207768	0.0211791	0.0215452	0.0217188	0.0216042	0.0218488	0.0216266	0.0214408	0.02147
1648	0.0222569	0.0218837	0.0212952	0.0216062	0.0212442	0.021657	0.0211865	0.0212112	0.0210537	0.0210919	0.0213003	0.0212733	0.0209988	0.0213927	0.0215712	0.0217071	0.0216429	0.0217825	0.0218618	0.0215859	0.0216735
1646	0.0220901	0.0219477	0.0212082	0.0214722	0.0212124	0.0215093	0.0213982	0.0214059	0.0212467	0.0211283	0.0212872	0.0214386	0.0211969	0.0214841	0.0215595	0.0216412	0.0216036	0.0216701	0.021984	0.0217608	0.0217479
1644	0.0216728	0.0218118	0.0211106	0.0212073	0.0211295	0.0212324	0.0213803	0.0213266	0.0212527	0.0211282	0.0210623	0.0214328	0.0212065	0.0214013	0.0213966	0.0214433	0.0213896	0.0215233	0.0218245	0.0218492	0.0215916
1642	0.021233	0.021564	0.0210653	0.0209822	0.021068	0.0210608	0.0212281	0.0211063	0.0211747	0.0211267	0.0209162	0.0214025	0.0211308	0.0213637	0.0212054	0.0212613	0.0212054	0.0214629	0.0216069	0.0218881	0.0213877
1640	0.0210036	0.0213296	0.0210699	0.0208698	0.0210159	0.0210264	0.0210431	0.0209171	0.0211221	0.021084	0.0209719	0.0214069	0.0211134	0.0214929	0.0211783	0.0212566	0.0212584	0.0215498	0.0215889	0.0219625	0.021309
1638	0.0209734	0.021136	0.0210653	0.0207801	0.0209115	0.0209949	0.020864	0.0207672	0.0210666	0.0209463	0.0210951	0.0213982	0.0211691	0.0216824	0.0213665	0.021406	0.0215226	0.0217065	0.0217625	0.0220548	0.0213574
1636	0.0210791	0.0210612	0.0211028	0.0207048	0.0208886	0.0210066	0.0208353	0.0206974	0.0210559	0.0208762	0.0212264	0.0214614	0.0213308	0.0218516	0.0217408	0.0216318	0.0219006	0.0218615	0.0220413	0.0221233	0.0215671
1634	0.0213398	0.0212376	0.0213129	0.0207955	0.0212083	0.0212676	0.021126	0.0208853	0.021287	0.0211896	0.0215105	0.0217935	0.0216945	0.0221128	0.0222063	0.021931	0.0223487	0.0220731	0.02243	0.0222459	0.0220306
1632	0.0217118	0.0215403	0.0216034	0.021038	0.0217195	0.0216682	0.0215451	0.0212929	0.0217096	0.0217637	0.0219357	0.0222567	0.0221642	0.0225192	0.0226048	0.0222988	0.0227983	0.0224101	0.0228887	0.0225066	0.0226014
1630	0.0220845	0.0217455	0.0218021	0.0212713	0.0220606	0.0219296	0.0218399	0.021688	0.0220652	0.0222106	0.0222886	0.0225443	0.0225495	0.0229278	0.0228935	0.0226837	0.0231481	0.0228381	0.0232943	0.0228601	0.0230575
1628	0.0224645	0.0219232	0.0220176	0.0215759	0.0222351	0.0221267	0.0221204	0.0220632	0.0223522	0.0225114	0.022579	0.0226964	0.0228921	0.0232951	0.0232114	0.0231326	0.0234228	0.0233703	0.0236551	0.0233136	0.0234517
1626	0.0230063	0.0224331	0.0226072	0.0222622	0.0226104	0.0226604	0.0227188	0.0226765	0.0228731	0.0230167	0.023133	0.0231116	0.0234737	0.0238014	0.0238096	0.0238362	0.0238703	0.0241165	0.024193	0.0240123	0.0240567
1624	0.0238511	0.0235257	0.0237512	0.0234225	0.023496	0.0237489	0.0237623	0.0237101	0.0238558	0.0239971	0.0241935	0.0240783	0.0244885	0.024642	0.0248072	0.0249059	0.024748	0.0251196	0.0250934	0.0250386	0.0250057
1622	0.0249767	0.0250163	0.0251982	0.0247594	0.0247992	0.0251461	0.0250578	0.0250432	0.0251773	0.0253244	0.0255842	0.0254413	0.0258367	0.0258334	0.0261012	0.0262565	0.0260378	0.0263322	0.0262873	0.0263242	0.0261676
1620	0.026309	0.0266069	0.0266636	0.0260847	0.0263469	0.0266366	0.0265182	0.0265744	0.0267252	0.0268753	0.0271463	0.0271286	0.027532	0.0274905	0.027761	0.0279692	0.0277594	0.0279235	0.0278395	0.0279838	0.0276586
1618	0.0277592	0.0281307	0.0280463	0.0275036	0.0280958	0.0282606	0.0282381	0.0283869	0.0286133	0.0288176	0.0291018	0.0294961	0.029933	0.0299823	0.030188	0.030457	0.03027	0.030362	0.030247	0.030442	0.030055
1616	0.0291623	0.0295293	0.029353	0.029125	0.0299455	0.030029	0.030212	0.030515	0.030911	0.031311	0.031735	0.032788	0.033272	0.033445	0.033619	0.033955	0.033812	0.033905	0.033877	0.033929	0.03369
1614	0.0304973	0.030946	0.030773	0.030949	0.03183	0.031905	0.032402	0.032892	0.033534	0.034258	0.034942	0.0366	0.03718	0.03739	0.037642	0.038005	0.03793	0.038095	0.038224	0.037991	0.037958
1612	0.0320866	0.03271	0.032683	0.033109	0.03398	0.034094	0.034981	0.035567	0.036483	0.037492	0.038358	0.040285	0.040973	0.04113	0.041504	0.041801	0.04178	0.042077	0.04227	0.041834	0.041858
1610	0.0343563	0.035098	0.035362	0.035844	0.036692	0.036886	0.03807	0.038604	0.039733	0.040801	0.041584	0.043355	0.044007	0.044098	0.044506	0.044648	0.044634	0.045045	0.045174	0.044736	0.044664
1608	0.0373478	0.038041	0.038583	0.039033	0.039796	0.040089	0.041268	0.041671	0.042834	0.043671	0.04412	0.045398	0.045765	0.045824	0.046133	0.046102	0.046039	0.046452	0.0465	0.046179	0.045995
1606	0.0403336	0.040873	0.041451	0.041833	0.04241	0.042748	0.043605	0.04389	0.04483	0.045261	0.045305	0.045936	0.045911	0.045931	0.046099	0.045926	0.045794	0.04609	0.046136	0.045894	0.04568
1604	0.0419802	0.042416	0.04273	0.042959	0.043315	0.043577	0.04401	0.044185	0.044723	0.044745	0.044489	0.044521	0.044264	0.044193	0.044278	0.043997	0.043828	0.043964	0.044081	0.04382	0.043655
1602	0.0412718	0.0417	0.041663	0.041641	0.041862	0.04195	0.042074	0.042135	0.042296	0.042017	0.041631	0.041292	0.041052	0.04088	0.040933	0.04061	0.040483	0.040463	0.04069	0.04038	0.040267
1600	0.038552	0.038954	0.03875	0.038485	0.038683	0.038592	0.038565	0.038562	0.038537	0.038076	0.037721	0.037338	0.037168	0.036984	0.036999	0.036762	0.036735	0.036593	0.03693	0.036635	0.036501
1598	0.0351405	0.03541	0.035258	0.034861	0.035063	0.034848	0.034762	0.034779	0.034743	0.034195	0.033987	0.033835	0.033583	0.033512	0.033477	0.033443	0.033498	0.033334	0.033694	0.033535	0.033272
1596	0.0320105	0.032117	0.032073	0.031647	0.031812	0.031536	0.03145	0.031497	0.031497	0.030977	0.030951	0.031148	0.030717	0.030806	0.030744	0.030911	0.030981	0.03095	0.031173	0.031246	0.030813
1594	0.0294607	0.0294949	0.0294884	0.0290784	0.0291747	0.0289277	0.02888	0.0288927	0.0288711	0.0285393	0.0286282	0.0290997	0.0286463	0.0288275	0.0287667	0.0290158	0.029064	0.0292477	0.0292448	0.0295357	0.0290198
1592	0.0275898	0.027612	0.0275907	0.0272011	0.0272572	0.0271538	0.0271119	0.0270563	0.026945	0.0269385	0.0270215	0.0275717	0.0273883	0.0275527	0.0275004	0.0277243	0.027778	0.0280788	0.027958	0.0283342	0.0278564
1590	0.0264686	0.0263887	0.0263762	0.0259841	0.0260588	0.0261669	0.0260441	0.0259577	0.025744	0.0260719	0.026067	0.0265525	0.0267746	0.0268801	0.0268579	0.0270372	0.0271418	0.0273856	0.0273484	0.0276825	0.0272408
1588	0.025987	0.0256743	0.0257224	0.0252849	0.0254128	0.0257015	0.0254624	0.02536	0.0251023	0.0256335	0.0255414	0.0259904	0.0264792	0.0265742	0.0266389	0.0267781	0.0269515	0.0270619	0.0271994	0.0274809	0.0269698
1586	0.025864	0.0253502	0.0254866	0.0249885	0.0251455	0.0255112	0.0252291	0.0250476	0.0248523	0.0254158	0.0253032	0.0258659	0.0263492	0.0265039	0.0266901	0.02676	0.0269957	0.0270289	0.0272736	0.0275666	0.0269556
1584	0.0258644	0.025355	0.0255601	0.025048	0.0251711	0.0255126	0.0252826	0.0249658	0.0249212	0.0254438	0.0254003	0.0261775	0.026487	0.0267222	0.02698	0.0269716	0.027253	0.0273004	0.0275428	0.027856	0.0272703
1582	0.0259577	0.0256299	0.0258322	0.0253583	0.0254186	0.0256836	0.0255045	0.0251019	0.0252084	0.0257449	0.0258379	0.026795	0.0269622	0.0272626	0.0275024	0.0274599	0.0277687	0.0278681	0.0280648	0.0283127	0.0278963
1580	0.0262439	0.0261224	0.026222	0.0257796	0.0258294	0.0260081	0.0257845	0.0254513	0.0256195	0.0262483	0.0265084	0.0275781	0.0277231	0.0280936	0.0282785	0.0282225	0.0285522	0.0286835	0.0288595	0.0289498	0.0287268

## Sheet: p-CF₃-tren-trisurea_TBAOCN
Wavenumbers [1/cm]	1	2	3	4	5	6	7	8	9	10	11	12	13	14	15	16	17	18	19	20
1750	0.00516732	0.00497741	0.00499415	0.00524952	0.00499679	0.00515293	0.00506331	0.00531153	0.00519637	0.00535643	0.00549211	0.00559406	0.00529976	0.00570422	0.00572318	0.00575875	0.00576765	0.00552687	0.00548559	0.00558098				H (M)	G (M)	eq (G/H)
1748	0.00513325	0.00507166	0.00506081	0.00536933	0.00515333	0.00526791	0.00510165	0.00543926	0.00526817	0.00551544	0.00572875	0.0058269	0.00549026	0.00584262	0.00584698	0.00589367	0.00593806	0.00566472	0.00558941	0.00573262			1	0.0116167	0	0
1746	0.00518616	0.00517187	0.00514279	0.00542384	0.00527227	0.00527239	0.00514167	0.00548647	0.0053312	0.00553733	0.00580534	0.0058256	0.00548803	0.00576511	0.00576416	0.00582856	0.00592187	0.0056687	0.00554662	0.00580143			2	0.0116167	0.000538956	0.0463948
1744	0.00523385	0.00518469	0.00518938	0.00539227	0.00527968	0.00519341	0.00516757	0.00544162	0.0053477	0.00546664	0.00577466	0.005712	0.0054199	0.0056085	0.00561231	0.00566227	0.00582812	0.00564683	0.00547607	0.00581563			3	0.0116167	0.00107434	0.0924824
1742	0.00529141	0.00517727	0.00521951	0.00532766	0.00522812	0.00516618	0.00520106	0.00540965	0.00534527	0.0053845	0.00570747	0.00563905	0.00540846	0.0055333	0.00553881	0.00552217	0.00576921	0.0056759	0.0054637	0.00576207			4	0.0116167	0.0016062	0.138266
1740	0.0054425	0.00528854	0.00530249	0.00534246	0.00524953	0.00529024	0.00530372	0.00551589	0.00544385	0.00539671	0.00568835	0.0056618	0.00552244	0.00564575	0.005631	0.00553829	0.00581257	0.00577687	0.00557032	0.00571532			5	0.0116167	0.00213455	0.183748
1738	0.00564331	0.00548847	0.00543897	0.00546372	0.00539324	0.00548042	0.00547414	0.00573326	0.00569579	0.00553774	0.00578081	0.00575125	0.00576139	0.005939	0.00586045	0.00575202	0.00596403	0.00593256	0.00582048	0.00582661			6	0.0116167	0.00265944	0.228932
1736	0.00576357	0.00560864	0.00556031	0.00561167	0.00560013	0.00557718	0.00563472	0.00590855	0.00598646	0.00572745	0.00598182	0.00588864	0.0060533	0.006295	0.0061236	0.0060693	0.0061803	0.0061091	0.006164	0.00614			7	0.0116167	0.00369896	0.318417
1734	0.0058131	0.0056243	0.00565718	0.00575431	0.00582074	0.00558581	0.00574407	0.00595866	0.0061484	0.00586757	0.0062178	0.0060687	0.006271	0.0065407	0.0063315	0.0063278	0.0063826	0.0062651	0.0064547	0.0064899			8	0.0116167	0.00472502	0.406743
1732	0.0059528	0.00573542	0.00581015	0.00595687	0.0060402	0.00569186	0.00585395	0.0059752	0.0061615	0.00595641	0.0063791	0.0062194	0.0063195	0.006581	0.0064563	0.0064306	0.0064776	0.0063602	0.0065352	0.0066417			9	0.0116167	0.00573789	0.493933
1730	0.00620846	0.0060332	0.0060462	0.0062187	0.0062208	0.00595816	0.006014	0.0060692	0.0061678	0.0060641	0.0064358	0.0062753	0.0062598	0.0065247	0.0065298	0.0064471	0.0064581	0.0063929	0.0064448	0.0066047			10	0.0116167	0.00673781	0.580009
1728	0.00648245	0.006405	0.0063359	0.0064701	0.0063691	0.0062834	0.0062413	0.0062563	0.0062804	0.0062391	0.0064914	0.0063338	0.0062493	0.0065547	0.0066244	0.0065218	0.0064535	0.0064406	0.006403	0.0066013			11	0.0116167	0.00772504	0.664992
1726	0.00681493	0.006819	0.0067219	0.0067508	0.0066201	0.006664	0.0066126	0.0065863	0.0065775	0.0065529	0.0067179	0.0066027	0.0064499	0.0068075	0.0068706	0.0067955	0.0066734	0.0066675	0.0066446	0.0068414			12	0.0116167	0.0101391	0.872803
1724	0.00735743	0.0073721	0.0072861	0.0072112	0.0071535	0.0072247	0.007238	0.0071704	0.0071658	0.0071374	0.007274	0.0072371	0.0070088	0.0073922	0.0074337	0.0073916	0.0073105	0.0072632	0.0073255	0.0074669			13	0.0116167	0.0124789	1.07422
1722	0.00820101	0.0081537	0.0080728	0.0079773	0.008057	0.0080888	0.0081734	0.0080887	0.0081465	0.0081259	0.0082607	0.0082856	0.0080377	0.0084224	0.0084467	0.0083954	0.0084523	0.0083447	0.008484	0.0085716			14	0.0116167	0.0147478	1.26953
1720	0.00944195	0.0092914	0.0092032	0.0091719	0.0094059	0.0094011	0.0095164	0.0094587	0.0096498	0.0096649	0.0098277	0.0098688	0.0096888	0.0100955	0.0100695	0.0099535	0.0101843	0.0100285	0.0101887	0.0103035			15	0.0116167	0.016949	1.45901
1718	0.011368	0.0111154	0.011015	0.0110651	0.0114251	0.0114339	0.0115392	0.0115608	0.0118852	0.0119506	0.012232	0.0122743	0.0121928	0.0126665	0.0125458	0.0123542	0.0127044	0.0125435	0.0126718	0.012893			16	0.0116167	0.0190854	1.64292
1716	0.0141516	0.0138503	0.0137103	0.0138245	0.0142084	0.0142836	0.0143787	0.0145162	0.0148529	0.0149514	0.015432	0.015517	0.015498	0.016026	0.015841	0.015658	0.016008	0.015917	0.015998	0.016293			17	0.0116167	0.0231751	1.99498
1714	0.0173323	0.017046	0.016844	0.017057	0.017341	0.017497	0.017637	0.017882	0.018137	0.01826	0.01887	0.019074	0.019109	0.019615	0.019455	0.019398	0.019688	0.019713	0.019772	0.020043			18	0.0116167	0.0270376	2.32747
1712	0.0204049	0.020152	0.019939	0.020314	0.020476	0.020692	0.020961	0.021286	0.021518	0.021711	0.022316	0.022728	0.022859	0.0233	0.023214	0.023314	0.023592	0.023707	0.023772	0.024005			19	0.0116167	0.0306914	2.642
1710	0.0233173	0.023115	0.022989	0.023536	0.023657	0.02391	0.024384	0.024801	0.025112	0.025454	0.026018	0.026727	0.026974	0.027373	0.027377	0.027576	0.027899	0.028045	0.028127	0.028376			20	0.0116167	0.0341528	2.93997
1708	0.0260438	0.025967	0.025993	0.026663	0.026847	0.027136	0.027851	0.02842	0.028844	0.029392	0.029998	0.031026	0.031373	0.031777	0.031902	0.032113	0.032447	0.032612	0.032704	0.03299
1706	0.0284059	0.028552	0.028733	0.029464	0.02976	0.030129	0.031051	0.031834	0.032362	0.033089	0.033854	0.035111	0.035554	0.035997	0.036256	0.036413	0.036663	0.036897	0.036981	0.037256
1704	0.0302875	0.030669	0.03099	0.031757	0.032149	0.032655	0.033729	0.034693	0.035382	0.036182	0.037159	0.038516	0.039058	0.039574	0.0399	0.039965	0.040101	0.040435	0.040494	0.040697
1702	0.0315641	0.032075	0.032547	0.03336	0.033805	0.034432	0.035637	0.036638	0.037621	0.038363	0.039493	0.0409	0.04149	0.042121	0.042392	0.042342	0.042473	0.042807	0.042837	0.042961
1700	0.0317899	0.032296	0.032886	0.033757	0.034205	0.034814	0.036114	0.037016	0.038323	0.038937	0.04004	0.041502	0.04202	0.042757	0.04291	0.042749	0.043021	0.043164	0.043157	0.04326
1698	0.0305169	0.030948	0.031509	0.03241	0.032802	0.033241	0.034472	0.035285	0.036684	0.037198	0.038048	0.039499	0.03984	0.040587	0.040668	0.04046	0.040861	0.040752	0.040679	0.040838
1696	0.0280701	0.02838	0.028755	0.029584	0.029894	0.030151	0.031092	0.03187	0.033033	0.033491	0.033998	0.035282	0.035407	0.036062	0.036133	0.035965	0.03632	0.036119	0.035952	0.03621
1694	0.0253283	0.025455	0.025606	0.026236	0.02648	0.026636	0.027199	0.027838	0.028626	0.029	0.029251	0.030236	0.030122	0.030674	0.030748	0.030661	0.030833	0.030693	0.03045	0.030797
1692	0.0230003	0.022939	0.022915	0.023293	0.023471	0.023564	0.023815	0.024142	0.024605	0.02485	0.024963	0.02559	0.02525	0.025735	0.025801	0.025794	0.025779	0.025692	0.025444	0.02582
1690	0.0214286	0.021254	0.021113	0.021294	0.021359	0.021375	0.021412	0.021372	0.021616	0.021742	0.02175	0.022001	0.021536	0.021972	0.022002	0.022054	0.021925	0.021815	0.021638	0.021952
1688	0.0206175	0.020388	0.020179	0.020267	0.020154	0.020073	0.019934	0.019627	0.019725	0.019774	0.019624	0.019499	0.019055	0.01943	0.019355	0.019423	0.019287	0.019099	0.019037	0.019197
1686	0.0202951	0.019977	0.019722	0.019811	0.019478	0.019284	0.018945	0.018517	0.018471	0.01844	0.01807	0.01759	0.017227	0.017512	0.017268	0.017281	0.017244	0.016958	0.017009	0.01696
1684	0.0200577	0.019588	0.01926	0.01939	0.018857	0.018525	0.017973	0.017477	0.017235	0.017023	0.016474	0.015676	0.015284	0.015454	0.015094	0.015023	0.015097	0.0147215	0.0148407	0.0146138
1682	0.0196801	0.019111	0.018674	0.018805	0.018156	0.017688	0.016976	0.016369	0.015913	0.01543	0.0148556	0.013776	0.0132127	0.0132799	0.0129556	0.0128865	0.012943	0.0125323	0.0126813	0.0123667
1680	0.0191642	0.018609	0.018094	0.018128	0.017481	0.01693	0.01613	0.015424	0.0148264	0.0141156	0.0136193	0.0123038	0.0115985	0.0116135	0.0113817	0.0114082	0.0113321	0.0109715	0.0111515	0.0108033
1678	0.018404	0.01791	0.017384	0.017234	0.01671	0.016144	0.015308	0.0146085	0.0139682	0.0131498	0.0127228	0.0112865	0.0105587	0.0105669	0.0103874	0.0104842	0.0102939	0.0100417	0.0102649	0.0098942
1676	0.0172298	0.016805	0.016296	0.01597	0.015652	0.015107	0.0142924	0.0137188	0.0131101	0.0123003	0.0118833	0.010525	0.0098449	0.0098619	0.0097297	0.0097913	0.0095774	0.0094291	0.0096982	0.0093339
1674	0.015722	0.015389	0.0148696	0.0145245	0.0143717	0.0138699	0.0131364	0.0127328	0.0121906	0.0114718	0.0110368	0.0099452	0.0093146	0.0093284	0.0093006	0.0092601	0.009082	0.0089748	0.0092922	0.0089998
1672	0.0142208	0.0139711	0.0134295	0.0132548	0.0131	0.0126946	0.0120694	0.0117723	0.0112935	0.0107054	0.0103096	0.0095194	0.0089304	0.0089303	0.0090235	0.0089165	0.0087689	0.008636	0.0089954	0.0088314
1670	0.0129315	0.0126914	0.0121605	0.0121841	0.0119012	0.0116681	0.0111422	0.0108484	0.010403	0.0099548	0.0097	0.0090904	0.0085575	0.0085591	0.0086975	0.0085903	0.0084645	0.0082916	0.0086445	0.0086085
1668	0.0117895	0.0115293	0.0110167	0.0111293	0.0107464	0.0107129	0.0102661	0.0099408	0.0094877	0.0091824	0.0090959	0.008549	0.0080711	0.0081071	0.0082165	0.0081269	0.0080557	0.0078658	0.008138	0.0081831
1666	0.010753	0.0105627	0.0100206	0.0101761	0.0097787	0.0098992	0.0094926	0.0091971	0.0087098	0.0085398	0.0085292	0.0080271	0.0075624	0.0076686	0.0077368	0.0076665	0.0076842	0.0074937	0.0076582	0.0077298
1664	0.00990923	0.0098665	0.0092858	0.0095355	0.0091559	0.0093516	0.0089221	0.0087523	0.0082377	0.0081594	0.0081042	0.0076911	0.0071911	0.0074026	0.007426	0.0073918	0.0075016	0.00732	0.0074219	0.0074788
1662	0.00932981	0.0093523	0.0088251	0.0091655	0.0088047	0.0089916	0.0085055	0.0085123	0.0080013	0.0079444	0.0078024	0.0075178	0.006971	0.0072972	0.0072633	0.0072437	0.0074382	0.0072866	0.0073813	0.0074066
1660	0.00898795	0.0089304	0.0085479	0.0088716	0.0085507	0.0086537	0.0081587	0.008322	0.0078434	0.0077686	0.0075805	0.0074231	0.0068625	0.0072593	0.0072034	0.0071187	0.0073879	0.0072877	0.0073813	0.0073868
1658	0.00878562	0.0086477	0.0083804	0.008627	0.0083559	0.0083521	0.0079326	0.0082086	0.0077825	0.0077197	0.0075406	0.0074625	0.006945	0.0073433	0.0073434	0.0071505	0.0074469	0.0073907	0.0074693	0.0074789
1656	0.00857412	0.0084976	0.0082398	0.008493	0.00823	0.0081937	0.0078879	0.0082498	0.0079048	0.0079195	0.0077972	0.0077128	0.0073184	0.0076762	0.0077648	0.0075403	0.0077551	0.0077074	0.0077936	0.0078202
1654	0.00816402	0.0082349	0.0079429	0.0083144	0.0080211	0.008103	0.0078795	0.0082947	0.0080643	0.0081879	0.0081834	0.0080084	0.007841	0.0081447	0.0082708	0.0081628	0.0081746	0.0081016	0.0082399	0.0082749
1652	0.00751742	0.0076244	0.0073801	0.0077968	0.0075543	0.0078159	0.0076257	0.0080266	0.0078957	0.0080798	0.0082076	0.0079791	0.0080602	0.0082876	0.008402	0.0084401	0.0082736	0.0081697	0.0083484	0.008362
1650	0.00693525	0.0069583	0.0068184	0.0071068	0.0070451	0.0073272	0.0071819	0.0075157	0.0074164	0.0075885	0.007734	0.0076524	0.0078012	0.0079395	0.0080689	0.0080893	0.0079649	0.0078284	0.0079903	0.007955
1648	0.00662103	0.006607	0.0064915	0.0066745	0.0067681	0.0068953	0.0068473	0.0071082	0.0070181	0.0071362	0.0071793	0.0074025	0.0073855	0.0074932	0.0076232	0.0075179	0.0076071	0.0074022	0.007555	0.007479
1646	0.00649192	0.0064668	0.0062831	0.0065017	0.0066031	0.0065509	0.0066199	0.0067936	0.0067565	0.0067636	0.0067017	0.0072061	0.0069238	0.0070983	0.0071338	0.0069629	0.0072544	0.0069555	0.007139	0.0070808
1644	0.00649442	0.0063424	0.0060995	0.0063716	0.0063806	0.0062219	0.0063574	0.0064244	0.0064767	0.0063245	0.0062187	0.0068253	0.0063683	0.0066405	0.0065546	0.0064277	0.0067814	0.0064447	0.0066235	0.0066618
1642	0.00664915	0.0062706	0.0060605	0.0062656	0.0062238	0.0060228	0.0061345	0.0061379	0.0062596	0.0060113	0.00587728	0.0064046	0.00597565	0.0062743	0.0061765	0.0061321	0.0063998	0.0061397	0.0062198	0.0063706
1640	0.00689617	0.0063531	0.0062496	0.0063238	0.0063338	0.0061043	0.0061473	0.0061807	0.0063349	0.0061388	0.00595661	0.0063534	0.0060977	0.0063536	0.0063247	0.0063441	0.0064553	0.0063425	0.0062904	0.0064869
1638	0.00710099	0.0065509	0.0065474	0.0065598	0.0066718	0.0064083	0.0064307	0.0065431	0.0067223	0.0066677	0.0064881	0.0067785	0.0067196	0.006949	0.0069179	0.006996	0.0069337	0.0069659	0.0068351	0.0070097
1636	0.00715731	0.006745	0.0067389	0.006786	0.0069609	0.0066773	0.0067885	0.0069128	0.0071239	0.0071275	0.0071033	0.0072746	0.0073298	0.0076	0.0074427	0.0075993	0.0073771	0.0074996	0.0073696	0.0075335
1634	0.00708896	0.0068615	0.0067327	0.0067986	0.0069431	0.0066977	0.0069228	0.0069403	0.0071559	0.0070293	0.0072458	0.0072508	0.0072803	0.0076033	0.0073595	0.0076038	0.0073073	0.007425	0.0073386	0.0075598
1632	0.00700505	0.0069007	0.0066668	0.0066716	0.0067529	0.0066135	0.0068258	0.0067381	0.0069066	0.0066125	0.0069636	0.0068302	0.0067619	0.0070738	0.0068934	0.0072232	0.0069767	0.0070028	0.0069724	0.0072547
1630	0.00694125	0.0068676	0.0066429	0.0065875	0.0066606	0.006641	0.0067328	0.0066315	0.0067286	0.0063816	0.006756	0.006581	0.0064399	0.0066954	0.0066007	0.0070161	0.0068834	0.0067935	0.0068324	0.0071263
1628	0.00698704	0.0068629	0.0067115	0.0066656	0.0068103	0.0068408	0.0068301	0.0067648	0.006801	0.0064996	0.0068783	0.006756	0.0065847	0.0067857	0.0067062	0.0071644	0.0071234	0.0069785	0.0070661	0.0073688
1626	0.0074145	0.0072017	0.0070817	0.0071016	0.0073456	0.0073032	0.0072979	0.007234	0.0072497	0.0070163	0.007389	0.007377	0.0071688	0.0073598	0.0072892	0.0076574	0.0076152	0.0075532	0.0076052	0.0079704
1624	0.00839536	0.0081308	0.0079801	0.0080622	0.0083263	0.0081692	0.0082494	0.0081263	0.0081647	0.0079769	0.0082905	0.0083902	0.0080889	0.0083532	0.0083596	0.008498	0.0083695	0.0084741	0.0084266	0.0088666
1622	0.00970724	0.0094515	0.0093128	0.0094248	0.0095988	0.0094241	0.0095866	0.0094016	0.0094604	0.0093014	0.0095342	0.0097059	0.0093049	0.0097056	0.0097761	0.0096849	0.009479	0.0096559	0.0095606	0.0099979
1620	0.0110129	0.010792	0.0107669	0.0108886	0.0109534	0.0108526	0.011071	0.0108804	0.0109188	0.0107852	0.0109763	0.0111697	0.0107954	0.011293	0.011302	0.0111221	0.0109151	0.0109859	0.0109456	0.0112984
1618	0.0121106	0.0119421	0.0120353	0.0121637	0.0121925	0.0121378	0.0123713	0.012242	0.0122583	0.0121473	0.0123053	0.0124854	0.0123292	0.0127712	0.0126473	0.0125461	0.0124052	0.0123017	0.0123533	0.0126093
1616	0.013005	0.0129283	0.0130024	0.0131553	0.0131873	0.0131196	0.0132696	0.0132203	0.0133147	0.0132151	0.0132884	0.0134585	0.0135689	0.0138326	0.0136898	0.0137163	0.0136655	0.013521	0.0136201	0.0138084
1614	0.0139917	0.0140231	0.0139586	0.0141724	0.0141392	0.0141053	0.0140848	0.0140685	0.0143532	0.0142382	0.0142425	0.0144241	0.0146421	0.0147875	0.0148009	0.0148437	0.0148961	0.0148995	0.015007	0.015146
1612	0.0155284	0.015618	0.015438	0.015733	0.015571	0.015642	0.015497	0.015462	0.015904	0.015746	0.015809	0.015996	0.016159	0.016345	0.016564	0.016486	0.016672	0.016885	0.017003	0.017127
1610	0.0179389	0.017996	0.017806	0.018154	0.017914	0.018041	0.017915	0.017869	0.018273	0.018092	0.018303	0.018459	0.018539	0.018847	0.0192	0.018973	0.019312	0.019652	0.019784	0.019969
1608	0.0210503	0.020993	0.020876	0.021217	0.021009	0.021069	0.021033	0.021038	0.021192	0.021063	0.02136	0.021458	0.021482	0.021874	0.022262	0.021979	0.022439	0.022756	0.022897	0.023186
1606	0.0239794	0.023766	0.023736	0.024023	0.023877	0.023848	0.023813	0.023903	0.023748	0.023719	0.023986	0.024021	0.023955	0.024348	0.024706	0.024464	0.024977	0.025149	0.025291	0.025622
1604	0.0254333	0.025067	0.025076	0.025298	0.025148	0.025128	0.024968	0.025093	0.024747	0.024759	0.024968	0.024934	0.024701	0.025044	0.025343	0.025155	0.025635	0.025655	0.025774	0.026035
1602	0.0245895	0.024116	0.024096	0.024264	0.024058	0.024109	0.023824	0.02389	0.023525	0.023471	0.023649	0.023542	0.023123	0.023429	0.023648	0.023486	0.02384	0.023822	0.023873	0.024029
1600	0.0219133	0.021398	0.021316	0.021447	0.02122	0.021285	0.020979	0.020944	0.020646	0.020516	0.020624	0.020469	0.01993	0.020261	0.020378	0.020259	0.02043	0.020488	0.020461	0.020578
1598	0.0186548	0.018164	0.018025	0.018136	0.017952	0.017967	0.017695	0.0176	0.017348	0.01724	0.017196	0.017045	0.016465	0.016872	0.016884	0.016855	0.01687	0.016989	0.016946	0.017097
1596	0.0156786	0.01529	0.01508	0.015183	0.015078	0.01505	0.0147753	0.0146947	0.0144189	0.0144204	0.0142196	0.0141024	0.0135528	0.0139942	0.0139406	0.01399	0.0139591	0.0140261	0.0140518	0.0142578
1594	0.0132902	0.0130747	0.0127424	0.0128368	0.0128271	0.0127734	0.012456	0.0124484	0.0120856	0.0121944	0.0119199	0.011817	0.0113779	0.0117271	0.0116775	0.0117174	0.0117638	0.0117133	0.011837	0.0120758
1592	0.0116244	0.0115719	0.011105	0.0111857	0.0112728	0.0111694	0.0108201	0.0109054	0.0104304	0.0105902	0.0103137	0.010194	0.0099029	0.0100973	0.0100848	0.0100362	0.0102116	0.0100965	0.0102906	0.0105152
1590	0.0106499	0.0106461	0.010152	0.0102126	0.0103402	0.0101877	0.0098284	0.0099832	0.0094239	0.0095727	0.0093235	0.0091756	0.0089665	0.0091158	0.0091111	0.0089636	0.0092436	0.009143	0.0093802	0.0095273
1588	0.010103	0.0100329	0.0096723	0.0096943	0.0097483	0.0096194	0.0092482	0.0094167	0.0088478	0.0089001	0.0087226	0.0085357	0.0082956	0.0085686	0.0085478	0.0083197	0.0086628	0.0085791	0.0088501	0.0088773
1586	0.00976563	0.0096147	0.009453	0.0094038	0.0093011	0.0092578	0.0088823	0.0090054	0.0085112	0.0083767	0.0083142	0.0080593	0.0077496	0.0081756	0.0081751	0.0078837	0.0082475	0.0081406	0.0084192	0.0083557
1584	0.00968207	0.0095002	0.0094544	0.0093224	0.0090985	0.0091023	0.0087596	0.0088088	0.0084305	0.0081143	0.0081267	0.0077886	0.007468	0.0079127	0.0079822	0.0076723	0.0079909	0.0078708	0.008109	0.0080407

## Sheet: TBAOCN_p-CF₃-tren-trisurea
Wavenumbers [1/cm]	1	2	3	4	5	6	7	8	9	10	11	12	13	14	15	16	17	18	19	20	21
2200	0.00202038	0.0018179	0.00086699	0.0014767	0.0010542	0.00078593	0.0010596	0.0015412	0.001294	0.0011025	0.0012989	0.00096441	0.0011752	0.0015049	0.0015977	0.0012627	0.0013367	0.0014224	0.0017256	0.0015491	0.0015939			G (M)	H (M)	eq (H/G)
2198	0.00211278	0.001833	0.0010787	0.0017962	0.0014853	0.00094158	0.0011605	0.0016483	0.0015033	0.0013184	0.0014438	0.0010378	0.0015616	0.0016442	0.0017547	0.0013952	0.0014857	0.0016555	0.0018172	0.0017533	0.0016779		1	0.0065734	0	0
2196	0.0021037	0.0017351	0.0012037	0.0020509	0.0017277	0.0010717	0.0012217	0.0016841	0.0016483	0.0014366	0.0013856	0.0011446	0.0018196	0.0017503	0.0017657	0.0015713	0.0016197	0.0018228	0.0017943	0.0018428	0.001722		2	0.0065734	0.000198368	0.0301774
2194	0.00208231	0.0017081	0.0013517	0.0021613	0.0017613	0.001202	0.0013331	0.0017298	0.0017064	0.0015755	0.0012495	0.0013716	0.0019137	0.0018099	0.0017707	0.0018625	0.0017416	0.0019764	0.0017393	0.0019663	0.0017702		3	0.0065734	0.000395423	0.060155
2192	0.00211787	0.0018423	0.0015803	0.0021557	0.0017235	0.0014189	0.0015551	0.0018276	0.0016985	0.0017543	0.0012106	0.001636	0.001901	0.0018186	0.0018695	0.002186	0.0018557	0.0021555	0.0017589	0.0021231	0.0018352		4	0.0065734	0.000591177	0.0899348
2190	0.00214604	0.0020607	0.0017398	0.0020707	0.0016756	0.0016962	0.0017988	0.0019049	0.0015968	0.0018515	0.0013354	0.0017905	0.001832	0.0018109	0.0020317	0.002367	0.0019459	0.0022961	0.0018571	0.0021807	0.0019179		5	0.0065734	0.000785643	0.119519
2188	0.00211619	0.0022267	0.0017187	0.0019093	0.0015814	0.0018979	0.0019108	0.0018932	0.0014167	0.0017794	0.0015333	0.0018258	0.0017297	0.0018439	0.002153	0.0023386	0.0020306	0.0023079	0.0019624	0.0021101	0.0020108		6	0.0065734	0.000978834	0.148908
2186	0.00214353	0.0023004	0.0016837	0.0017223	0.0014933	0.0019735	0.0018812	0.0018674	0.0013213	0.0016465	0.0017068	0.0018769	0.0016759	0.0019451	0.0021955	0.0022223	0.0021754	0.0022211	0.0020674	0.0020528	0.002104		7	0.0065734	0.00136144	0.207114
2184	0.00235685	0.00234	0.0018642	0.0016219	0.0015557	0.0020112	0.0018535	0.0019514	0.00147	0.001665	0.0018813	0.0020361	0.0018164	0.0021038	0.0022384	0.0022039	0.0024014	0.0021799	0.0022645	0.0021484	0.0022093		8	0.0065734	0.00173909	0.264565
2182	0.00266796	0.0023714	0.002196	0.0016669	0.0017844	0.0020606	0.0018988	0.002124	0.0017894	0.001901	0.0021149	0.0022382	0.0021894	0.0023102	0.0023711	0.002365	0.0026116	0.0022711	0.002591	0.00239	0.002352		9	0.0065734	0.00211189	0.321278
2180	0.00284996	0.0023183	0.0023776	0.0017936	0.0020041	0.0020388	0.0019131	0.0022378	0.0020298	0.0021771	0.0023414	0.0023417	0.0025948	0.0025248	0.0025552	0.0026088	0.0026676	0.0024057	0.0028885	0.0026387	0.002501		10	0.0065734	0.00247992	0.377266
2178	0.00279647	0.0020805	0.0022468	0.0018827	0.0020449	0.0018749	0.0017922	0.0021997	0.0020301	0.0022536	0.0023898	0.0022699	0.0027547	0.0026144	0.0026259	0.0027338	0.0025313	0.0024156	0.0029154	0.0027312	0.0025384		11	0.0065734	0.00284328	0.432543
2176	0.00258678	0.001692	0.0019364	0.0018581	0.0019045	0.0016413	0.0016155	0.0020497	0.001845	0.0020872	0.0021958	0.0020773	0.0026176	0.0024717	0.0024917	0.0026361	0.0023251	0.0022808	0.0026438	0.0026104	0.0023919		12	0.0065734	0.0037318	0.567713
2174	0.00236801	0.0013896	0.0016985	0.0017449	0.0017252	0.0014877	0.0015764	0.001904	0.0016715	0.0018811	0.0019607	0.0019449	0.0024291	0.0022438	0.0023097	0.0024474	0.0022637	0.0022151	0.0023727	0.0024095	0.0022016		13	0.0065734	0.00459299	0.698724
2172	0.00226998	0.0014401	0.0016999	0.0016677	0.0016878	0.0015017	0.0017608	0.0018791	0.0017255	0.0018768	0.0020037	0.0020734	0.0024687	0.0022721	0.0023615	0.0024136	0.002486	0.0024537	0.0024405	0.0023741	0.002236		14	0.0065734	0.00542808	0.825765
2170	0.00234922	0.0018411	0.0019253	0.0017464	0.001886	0.0016663	0.0020649	0.0020261	0.0021023	0.0021375	0.0024209	0.0025072	0.0027773	0.0026962	0.0027525	0.002657	0.00293	0.0029834	0.002878	0.0026552	0.0026024		15	0.0065734	0.00623824	0.949013
2168	0.00251575	0.0022653	0.0021622	0.0019521	0.0022214	0.0018974	0.0023269	0.0022772	0.0026483	0.0025455	0.0029859	0.003097	0.0032028	0.0032843	0.0033566	0.0031416	0.0034372	0.0035956	0.0034777	0.0032265	0.0031711		16	0.0065734	0.00702457	1.06864
2166	0.0025798	0.0024071	0.0021667	0.0021237	0.0024568	0.0021048	0.0024874	0.0024998	0.0030525	0.0029613	0.0034217	0.0036862	0.0036457	0.0037893	0.0040618	0.0038271	0.0039954	0.004207	0.0041471	0.0040095	0.0038407		17	0.0065734	0.00852984	1.29763
2164	0.0024853	0.0023526	0.0019744	0.0021861	0.0024778	0.0022762	0.0026444	0.0026712	0.0031996	0.0033543	0.0037171	0.0042867	0.0041764	0.004333	0.0049222	0.0047346	0.0048039	0.0050011	0.0050165	0.0050017	0.0047419		18	0.0065734	0.00995148	1.5139
2162	0.00241177	0.0024395	0.0019243	0.0022765	0.0024419	0.0025103	0.0029708	0.0029607	0.0033541	0.0038124	0.0041154	0.0050121	0.0049526	0.0052564	0.0060337	0.005885	0.0060569	0.0062178	0.006221	0.006273	0.0060895		19	0.0065734	0.0112963	1.71848
2160	0.00254192	0.0027968	0.0022594	0.002575	0.002587	0.0029319	0.0035661	0.003583	0.003895	0.0045068	0.0048593	0.0059509	0.0061426	0.0067318	0.0074561	0.0073528	0.0078024	0.0079852	0.0078399	0.0079604	0.0079813		20	0.0065734	0.0125703	1.9123
2158	0.00286134	0.0032434	0.002864	0.0031047	0.0030144	0.0036056	0.0044044	0.0046291	0.0049686	0.0056615	0.0060739	0.0072486	0.0079343	0.0087513	0.0093745	0.009414	0.010106	0.010432	0.010107	0.010323	0.010479		21	0.0065734	0.013779	2.09617
2156	0.00331142	0.0036589	0.0035341	0.0038068	0.0037539	0.0045611	0.0054327	0.0060687	0.006486	0.0074276	0.0078152	0.0091683	0.010437	0.01135	0.012105	0.012388	0.013147	0.013726	0.013356	0.013602	0.013725
2154	0.0039746	0.004192	0.0043092	0.0047001	0.0048496	0.0057823	0.0066466	0.0077762	0.0082908	0.0096348	0.0099827	0.011762	0.013416	0.014457	0.015618	0.016116	0.016848	0.017707	0.017459	0.017599	0.017653
2152	0.00493199	0.0049868	0.0053176	0.0057968	0.0062005	0.0070905	0.0079977	0.0094705	0.010136	0.011726	0.012144	0.014479	0.016197	0.017518	0.019125	0.019721	0.020468	0.021536	0.021468	0.02144	0.021563
2150	0.00614117	0.0060271	0.0065351	0.0070233	0.0075365	0.0082542	0.0093534	0.01085	0.011687	0.013171	0.01374	0.016444	0.01806	0.019653	0.021495	0.022124	0.022911	0.024057	0.024122	0.024018	0.024291
2148	0.00774888	0.0074962	0.0080737	0.008497	0.0088879	0.0094434	0.010745	0.012007	0.012883	0.014038	0.014661	0.017323	0.018795	0.020417	0.022166	0.022817	0.023571	0.024642	0.024779	0.024721	0.025022
2146	0.0103251	0.0099786	0.010503	0.010732	0.010893	0.011357	0.012551	0.013511	0.01417	0.014954	0.015409	0.017596	0.018734	0.020101	0.02139	0.021982	0.022605	0.023438	0.023586	0.023598	0.023746
2144	0.0142404	0.013797	0.014243	0.014098	0.014093	0.014452	0.015088	0.015723	0.015966	0.016319	0.016438	0.017792	0.018213	0.019138	0.019615	0.019986	0.020392	0.020855	0.020916	0.020957	0.020916
2142	0.018661	0.018096	0.018484	0.017914	0.017825	0.017972	0.017862	0.018048	0.017852	0.017671	0.017448	0.017729	0.017215	0.017584	0.017094	0.017155	0.017223	0.017289	0.017167	0.017225	0.017082
2140	0.0216249	0.021009	0.021252	0.020469	0.020274	0.02014	0.019509	0.019169	0.018648	0.018011	0.017559	0.016778	0.015584	0.015375	0.01415	0.013954	0.013583	0.013365	0.013077	0.013142	0.012954
2138	0.0215546	0.021061	0.021004	0.020328	0.019991	0.019613	0.018842	0.018194	0.017502	0.01673	0.016172	0.014688	0.013366	0.012765	0.011315	0.010949	0.01023	0.0099175	0.0095821	0.0096011	0.0093386
2136	0.0186078	0.01834	0.018	0.017567	0.017172	0.016649	0.015968	0.015406	0.014708	0.014109	0.01351	0.011898	0.010861	0.010218	0.0089621	0.0084694	0.0076944	0.0074436	0.0071536	0.0071047	0.0067287
2134	0.0144233	0.014311	0.013936	0.013634	0.013318	0.012768	0.012242	0.01193	0.011395	0.011027	0.010418	0.0091546	0.008454	0.0080144	0.0070585	0.0065043	0.005937	0.0057878	0.0055377	0.0055129	0.005055
2132	0.010712	0.010627	0.010429	0.010102	0.0098852	0.0094562	0.0090932	0.0088532	0.0085872	0.0083238	0.0077534	0.0069936	0.0064702	0.0061929	0.0054528	0.0049644	0.0046556	0.0045208	0.0042832	0.0044062	0.0039638
2130	0.00819698	0.0080963	0.0080431	0.0076455	0.0074391	0.0072719	0.0070032	0.0066423	0.006641	0.0063854	0.0059096	0.0055188	0.0050554	0.0047618	0.004187	0.003853	0.0037248	0.0034788	0.0032919	0.0035474	0.0032283
2128	0.00667139	0.0065403	0.0064763	0.0060542	0.0058207	0.0059269	0.0056045	0.0051966	0.0053645	0.0051276	0.0047418	0.0044943	0.0041202	0.0037377	0.003346	0.0031403	0.0031418	0.0027506	0.0026724	0.0029047	0.0027492
2126	0.00564113	0.0053729	0.0052523	0.0048681	0.0046814	0.0048905	0.0044554	0.0042104	0.0044106	0.0042323	0.0038639	0.0036306	0.0034427	0.0030232	0.0028015	0.0026659	0.0027562	0.0023313	0.0023411	0.0024355	0.002354
2124	0.00479306	0.0042504	0.0041449	0.0038769	0.0037981	0.0038937	0.0034967	0.0034753	0.0035754	0.0034483	0.0030663	0.0028655	0.0028776	0.0024607	0.0023444	0.0022926	0.0023648	0.0020593	0.0020865	0.0020658	0.001901
2122	0.00406814	0.0032837	0.0032107	0.003157	0.0031338	0.0030461	0.002876	0.0029513	0.0028898	0.002754	0.0024706	0.0023608	0.0024416	0.0020227	0.0019558	0.002051	0.0019925	0.0018404	0.0018925	0.0018075	0.0015077
2120	0.00349633	0.0027137	0.0025841	0.0027869	0.0027362	0.0025592	0.002596	0.0026202	0.002471	0.0022558	0.0022505	0.0021888	0.002177	0.0017978	0.0017381	0.0020055	0.001806	0.0017125	0.001874	0.0017137	0.0013957
2118	0.00304865	0.0025113	0.0022627	0.0026244	0.0025667	0.0023929	0.0024546	0.0023483	0.0022844	0.0019696	0.0022974	0.0021505	0.0020188	0.0017829	0.0016655	0.0020594	0.0017954	0.0016937	0.0019536	0.0017244	0.0015249
2116	0.00266076	0.0023911	0.0020895	0.0024126	0.0024605	0.0022577	0.0022546	0.0019887	0.0021306	0.0017732	0.0022946	0.0020174	0.0018728	0.001831	0.0016112	0.002023	0.0017759	0.0017319	0.0019016	0.0016857	0.0016132
2114	0.00233142	0.0021515	0.0019285	0.0020662	0.002273	0.0019575	0.0019659	0.001577	0.0018865	0.0015704	0.0020754	0.0018214	0.0017376	0.0018159	0.0015466	0.0018149	0.0016717	0.001783	0.0016798	0.0015198	0.001515
2112	0.0021048	0.0018472	0.0017797	0.0017253	0.0019894	0.0015802	0.001669	0.0012889	0.0016381	0.0013937	0.0017458	0.0017247	0.0016452	0.0017245	0.001511	0.0015004	0.0015728	0.0018018	0.0014711	0.0012854	0.0013522
2110	0.00196229	0.0016232	0.0016858	0.0015146	0.0016676	0.0013129	0.0014155	0.0012038	0.0015178	0.0013023	0.0014696	0.0017048	0.00155	0.0015839	0.0014551	0.0011972	0.0015183	0.0016979	0.0013603	0.0010897	0.0012544
2108	0.00182877	0.0015146	0.0016199	0.0013797	0.0013595	0.0012071	0.0011969	0.0012256	0.0015117	0.0012648	0.0012911	0.0016008	0.0013899	0.001419	0.0013183	0.0010114	0.0014308	0.0014483	0.0012479	0.0010141	0.0011906
2106	0.00169436	0.0014567	0.0015299	0.0012297	0.0011207	0.0011935	0.0010243	0.001249	0.0015092	0.0012064	0.0011875	0.0014168	0.0012092	0.0012883	0.0012017	0.00099863	0.0012902	0.0012003	0.0011116	0.0010863	0.0011158
2104	0.00161155	0.0013784	0.0014077	0.0011064	0.0009962	0.0012047	0.00095023	0.0012604	0.0014513	0.0011083	0.0011423	0.0013208	0.0011007	0.0012481	0.0012528	0.0011028	0.001182	0.0011106	0.0010791	0.001233	0.0010719
2102	0.00154612	0.0012157	0.0012388	0.0010766	0.0009235	0.0011683	0.00097394	0.0012299	0.0013269	0.00099509	0.0010946	0.0013268	0.0010578	0.0012595	0.0013926	0.0011669	0.0011314	0.0011333	0.0011554	0.0012845	0.0010511
2100	0.00137437	0.00093932	0.00096775	0.0010641	0.00075709	0.00099391	0.00098738	0.001069	0.0011155	0.00087575	0.000945	0.0012291	0.00099394	0.0012217	0.0013797	0.0010896	0.0010584	0.0011111	0.0011261	0.0011332	0.0009551
2098	0.00109971	0.00063946	0.00061955	0.00094844	0.00048483	0.00070754	0.00089999	0.00079964	0.00086339	0.00076581	0.00070311	0.00093569	0.00090113	0.0011216	0.0011641	0.00094974	0.00095025	0.0010359	0.00088157	0.00088796	0.00080175
2096	0.000938421	0.00051149	0.00039112	0.00077977	0.00031736	0.00050693	0.00078762	0.00062738	0.00074519	0.00073716	0.00054612	0.00067033	0.00088287	0.0010621	0.00097275	0.00091791	0.00093007	0.001051	0.00064814	0.00078089	0.00079656
2094	0.00107888	0.00067556	0.0004846	0.0007413	0.00045584	0.00055939	0.00082231	0.00071688	0.0009048	0.00087485	0.00063857	0.00071785	0.0010064	0.0011251	0.0010071	0.0010746	0.0010886	0.0012147	0.00072296	0.00092283	0.0010673
2092	0.00143397	0.0010403	0.00085652	0.00091119	0.00084048	0.0008129	0.0010549	0.00097688	0.0012483	0.001178	0.00093832	0.0010838	0.0012147	0.0012836	0.001219	0.0013582	0.001357	0.0014319	0.0010983	0.0012164	0.001458
2090	0.00173976	0.0013913	0.0012349	0.001176	0.0012207	0.0010963	0.0013431	0.0011752	0.0015101	0.0015295	0.0012447	0.0015149	0.0014095	0.0014551	0.0014383	0.0016347	0.0015968	0.0016163	0.0015004	0.0014932	0.0017217
2088	0.00183951	0.0015716	0.0013813	0.0013786	0.001405	0.0013121	0.0015094	0.0012013	0.0015276	0.0017562	0.0013965	0.0017562	0.0015286	0.0015584	0.0015635	0.0017605	0.0017199	0.0017511	0.0017101	0.0016439	0.0017955
2086	0.00176453	0.0015602	0.0012819	0.0014566	0.001369	0.0014317	0.0015055	0.0011166	0.0013712	0.0017354	0.001376	0.0017068	0.0015248	0.0015257	0.0015663	0.0016524	0.0016896	0.001786	0.0017018	0.0016264	0.0017596
2084	0.00160574	0.0014409	0.001106	0.0014366	0.0012147	0.0014122	0.0013984	0.0010108	0.0012164	0.0014996	0.0012718	0.0014408	0.0013761	0.0013642	0.0014552	0.0013941	0.0015227	0.0016472	0.0015541	0.00147	0.0016516
2082	0.00142816	0.0013319	0.0010213	0.0013695	0.001102	0.0012527	0.0012637	0.00091601	0.0011633	0.0012294	0.0011876	0.0011601	0.0011579	0.0012034	0.001303	0.0012035	0.0013256	0.0013806	0.0013733	0.0012948	0.001476
2080	0.0012928	0.0013052	0.00105	0.0012895	0.0011404	0.0010636	0.0011407	0.00083776	0.0011903	0.0010891	0.0011588	0.0010531	0.0010122	0.0011829	0.0012098	0.0012043	0.0012291	0.0011468	0.0012609	0.0012291	0.0013132
2078	0.00126093	0.0013428	0.0010882	0.0011986	0.0012655	0.00096594	0.0010576	0.00078493	0.0012217	0.0010733	0.0011272	0.0011271	0.0010032	0.0012818	0.0011919	0.0012829	0.0012491	0.0010496	0.0012389	0.0012798	0.0012568
2076	0.00133975	0.0013873	0.0010546	0.0010785	0.001283	0.00096512	0.0010274	0.00076758	0.0012089	0.0010594	0.0010221	0.0012274	0.0010607	0.0013425	0.0011819	0.0012598	0.0012811	0.001066	0.0012239	0.0013447	0.0012662
2074	0.0014674	0.0014207	0.0009885	0.00093075	0.0011001	0.00099562	0.0010098	0.00079765	0.0011532	0.00098569	0.00086875	0.0012461	0.001088	0.0012693	0.0011465	0.0011354	0.0012459	0.0011398	0.0011502	0.0013561	0.0012082
2072	0.00155981	0.0014401	0.00096632	0.00078645	0.00084095	0.0010297	0.00093329	0.00087335	0.0010689	0.00089794	0.00076372	0.0012213	0.0010597	0.0011176	0.0011071	0.0010487	0.0011671	0.0012225	0.001074	0.0013366	0.0010347
2070	0.00156077	0.0014024	0.00097141	0.00066747	0.00068445	0.0010672	0.00078765	0.0009521	0.00095943	0.00083863	0.00075297	0.0012102	0.0010028	0.00099336	0.0010557	0.001051	0.0011038	0.0012401	0.001087	0.0013123	0.00083823
2068	0.00148657	0.0012723	0.0009392	0.00057607	0.00067197	0.0010825	0.00066206	0.00098629	0.00084698	0.00079647	0.00078919	0.0011908	0.00094944	0.00094844	0.00097043	0.0010626	0.0010898	0.0011643	0.0011747	0.0012609	0.00073772
2066	0.0014243	0.0011027	0.00089415	0.00053429	0.00073102	0.0010624	0.00065243	0.00098814	0.00079116	0.00077136	0.00080437	0.0011395	0.00092419	0.00098335	0.00090761	0.0010386	0.0011357	0.0011013	0.0012357	0.0011628	0.00077427
2064	0.00144305	0.00098136	0.00091261	0.00056681	0.00078111	0.0010378	0.00074726	0.00098955	0.00081944	0.0007862	0.00077287	0.0010951	0.00092567	0.0010646	0.00094792	0.0010181	0.0012091	0.0011573	0.0012087	0.0010283	0.00089944
2062	0.00149841	0.00091139	0.00096017	0.00062395	0.0007488	0.0010094	0.00082993	0.00094627	0.0008557	0.00080571	0.00070552	0.0010702	0.00090218	0.0011172	0.0010423	0.00099971	0.0012263	0.001241	0.0011085	0.00086056	0.0010069
2060	0.00147865	0.00084499	0.00091925	0.00061535	0.00060635	0.00092619	0.00080033	0.00078893	0.00080827	0.00076187	0.0006464	0.0010067	0.0008136	0.0010842	0.0010599	0.00092628	0.0011567	0.0011839	0.00098471	0.00067462	0.0010131
2058	0.00136971	0.00082479	0.00081196	0.00056458	0.00046807	0.00081048	0.00067939	0.00059566	0.00072541	0.00070152	0.00067926	0.00090313	0.00072339	0.0010143	0.0010043	0.0008335	0.001113	0.0010442	0.00091925	0.00056589	0.00096021
2056	0.0012913	0.00095015	0.00082075	0.00061738	0.00051665	0.00078942	0.00057775	0.0005801	0.00075085	0.00077081	0.00085438	0.00087683	0.00073679	0.0010126	0.0010163	0.00086643	0.0012129	0.001062	0.00099536	0.00065484	0.00098796
2054	0.00133127	0.001186	0.0010068	0.00082291	0.00074378	0.00090152	0.00058049	0.00082528	0.00090182	0.00098755	0.0010883	0.00099866	0.00083655	0.0010918	0.0011223	0.0010718	0.0013613	0.0012826	0.0011799	0.00091275	0.0011402
2052	0.00141788	0.0013397	0.0011585	0.001008	0.00089373	0.00097796	0.00066752	0.0011292	0.0010041	0.001147	0.0012102	0.00115	0.00087846	0.0011419	0.0011535	0.0012739	0.001313	0.0014432	0.0012842	0.001134	0.001258
2050	0.00142061	0.001283	0.0010474	0.00098448	0.00078513	0.0008558	0.00073982	0.0012241	0.00092138	0.0010588	0.0011423	0.0011587	0.00079266	0.0010667	0.0010057	0.0012635	0.0009951	0.001333	0.001155	0.0011539	0.0011613
2048	0.00132511	0.0010958	0.00072797	0.00081237	0.00055904	0.00062444	0.00072287	0.001085	0.0007503	0.00078857	0.00097642	0.0010305	0.00069303	0.00089345	0.0008218	0.0010565	0.00063202	0.0010733	0.00087989	0.0010338	0.00090323
2046	0.00122492	0.00093092	0.00045256	0.00072085	0.00046277	0.00050501	0.00063888	0.0009047	0.00068508	0.0005635	0.0008463	0.00093138	0.00071719	0.00072856	0.0007862	0.00085984	0.00047957	0.00090859	0.00069442	0.00096094	0.00072808
2044	0.00118763	0.00084009	0.00037089	0.00080618	0.00051019	0.00055311	0.00058545	0.00082479	0.00076086	0.0005143	0.00078125	0.00097063	0.00084449	0.00066543	0.00086138	0.00081251	0.00055353	0.00088507	0.00070046	0.0010199	0.00078343
2042	0.00121195	0.00080953	0.00045408	0.00095245	0.00054351	0.0006529	0.00064378	0.00082252	0.0008525	0.00060743	0.00072985	0.0011088	0.00095915	0.00075235	0.00088226	0.00086426	0.00071453	0.00089609	0.0007934	0.0011464	0.00098415
2040	0.00128524	0.00086866	0.00064231	0.0010379	0.00053807	0.00074996	0.00080282	0.00083718	0.00087942	0.00076222	0.00067927	0.0012556	0.0010302	0.00097373	0.00082448	0.00091537	0.00090346	0.00091861	0.00086529	0.0012608	0.0011736
2038	0.00140327	0.0010521	0.00090075	0.0010725	0.0006178	0.00089301	0.00097344	0.00086857	0.00088615	0.00091667	0.0006853	0.0013542	0.0011289	0.0012329	0.00081591	0.00097199	0.0011513	0.0010223	0.00094702	0.0013519	0.0013043
2036	0.00152952	0.0012882	0.0011416	0.0010969	0.00079217	0.0010475	0.0010663	0.00092006	0.00091887	0.0010076	0.00078594	0.0013667	0.0012788	0.0014079	0.0009129	0.0010956	0.0014082	0.0012003	0.0010971	0.0014211	0.0014088
2034	0.00159795	0.0014231	0.0012396	0.0010761	0.00090129	0.001065	0.0010512	0.00094264	0.0009292	0.0009964	0.00093261	0.0012673	0.0013858	0.0014498	0.0010194	0.0012578	0.0015132	0.0013424	0.0012524	0.0014207	0.0014787
2032	0.0015662	0.0013593	0.0011518	0.00095815	0.00084066	0.00088961	0.00095208	0.00087803	0.00084374	0.00090831	0.0010179	0.0010746	0.0013381	0.001381	0.001032	0.0013255	0.0013576	0.0013489	0.0012673	0.0012813	0.0014544
2030	0.00143707	0.0011386	0.0009468	0.00076385	0.00068196	0.00065428	0.00081195	0.00072218	0.00066612	0.00078588	0.00097054	0.00084657	0.0011259	0.0012194	0.00095389	0.0011985	0.0010166	0.001189	0.0010686	0.00099393	0.0013108
2028	0.00124049	0.00090637	0.00071155	0.0005642	0.00054009	0.0005041	0.00066397	0.00052795	0.00047118	0.00063339	0.00082899	0.0006333	0.00085315	0.0009728	0.00085361	0.00092712	0.00069044	0.00090306	0.00073239	0.00065376	0.0010953
2026	0.00103228	0.00080365	0.00050115	0.00041769	0.00044856	0.00043945	0.00052036	0.00037695	0.00033151	0.00046764	0.00070776	0.00046924	0.00065598	0.00070123	0.00079411	0.00066909	0.00053332	0.00061895	0.00042494	0.00040481	0.00088192
2024	0.000895476	0.00085819	0.00037494	0.00035914	0.00040991	0.00040319	0.00038524	0.00034659	0.0002784	0.00037209	0.00068071	0.00040741	0.00061563	0.00050725	0.00082008	0.00055273	0.00055715	0.00050567	0.00028801	0.00033304	0.0007254
2022	0.00088796	0.00095976	0.00038925	0.00039365	0.00045065	0.00040676	0.00028437	0.00045248	0.00030657	0.00041038	0.00071931	0.00049323	0.00071737	0.00044496	0.00093683	0.00059838	0.00067306	0.00061562	0.00034887	0.00040398	0.00065584
2020	0.000981593	0.0009833	0.0005262	0.0004775	0.00057197	0.00048585	0.00027593	0.00062399	0.00039634	0.00052749	0.00076144	0.00069059	0.0008703	0.0004919	0.001079	0.00074375	0.00080004	0.00081142	0.00051472	0.00052388	0.00068443
2018	0.00107705	0.00093425	0.00069161	0.00054816	0.00071204	0.00059943	0.00039681	0.00076804	0.00053165	0.00062417	0.00079509	0.00087896	0.00097053	0.00060455	0.001144	0.00089948	0.00091502	0.00092117	0.00066846	0.00064692	0.0007926
2016	0.00108962	0.0009121	0.0008101	0.00059014	0.00079433	0.00066129	0.00059703	0.00085205	0.00068709	0.00069369	0.0008307	0.00094966	0.00095834	0.00073768	0.0010802	0.00098472	0.0010002	0.00091622	0.00076557	0.00077673	0.00092362
2014	0.00102131	0.00094565	0.00087782	0.00063424	0.00078309	0.00064629	0.0007656	0.0008948	0.00080619	0.00078935	0.00083562	0.00090201	0.00084394	0.00082742	0.00093006	0.0009704	0.0010022	0.00087013	0.00082667	0.00089181	0.0010093
2012	0.000957084	0.00096209	0.00091795	0.0006937	0.0007036	0.00060386	0.00084356	0.00090663	0.00083682	0.00089244	0.00077978	0.00083823	0.00070836	0.00084483	0.00079123	0.00090669	0.00090653	0.00081885	0.00086427	0.0009399	0.0010277
2010	0.000995888	0.00093867	0.00093763	0.00076008	0.00064922	0.00059269	0.00087825	0.00090135	0.000808	0.00093412	0.00072348	0.00086605	0.00066863	0.00086437	0.00075326	0.00087398	0.00081919	0.00077052	0.00087067	0.00091878	0.0010239
2008	0.00116929	0.00096977	0.00094975	0.00086547	0.00073604	0.00065847	0.00094748	0.00093965	0.00083189	0.00093609	0.00077204	0.0010108	0.00079837	0.00099022	0.00085939	0.00091015	0.0008905	0.00079235	0.00087505	0.00091035	0.0010638
2006	0.00140511	0.0011197	0.00098858	0.0010603	0.00096837	0.00083269	0.0010651	0.0010733	0.0009799	0.0010034	0.00093701	0.0011931	0.0010452	0.001202	0.0010766	0.0010001	0.0011334	0.00094392	0.00094042	0.00099303	0.001166
2004	0.0015848	0.0012957	0.0010667	0.0012891	0.0011775	0.0010792	0.0011784	0.0012356	0.0011708	0.0011498	0.0011019	0.0012916	0.0012526	0.0013542	0.0012895	0.0011137	0.0013724	0.0011353	0.0010686	0.0011438	0.001277
2002	0.00165551	0.0013598	0.0011459	0.0013774	0.0011915	0.0012611	0.0012301	0.001278	0.0012433	0.0012468	0.0011496	0.0012551	0.0013041	0.0013571	0.0013763	0.0012155	0.001427	0.0011883	0.0011713	0.0012656	0.0013245
2000	0.00165956	0.0012995	0.0011792	0.0012147	0.0010328	0.0012305	0.001196	0.0011442	0.0011326	0.0011886	0.0010721	0.0011406	0.0012228	0.0012687	0.0013117	0.0012533	0.001296	0.0010515	0.0011765	0.0012856	0.0012803

## Sheet: NBS_TBACl
Wavenumbers [1/cm]	1	2	3	4	5	6	7	8	9	10	11	12	13	14	15	16	17	18	19	20	21	22
1800	0.00502247	0.00496693	0.00510039	0.00515446	0.00505932	0.00502811	0.00507968	0.00506789	0.00511581	0.00497361	0.0050609	0.00500222	0.00500214	0.0049733	0.00506244	0.00495271	0.00494268	0.00491629	0.00501952	0.00507708	0.00502048	0.00503232			H (M)	G (M)	eq (G/H)
1798	0.00487739	0.00489207	0.00493757	0.00501729	0.00491042	0.0048784	0.00494879	0.00494119	0.00492782	0.00491001	0.00491526	0.00493254	0.00490481	0.00491648	0.00488882	0.00490634	0.0049076	0.00489331	0.00487761	0.00488346	0.00490265	0.00490704		1	0.0202944	0	0
1796	0.00486285	0.00488256	0.00484247	0.00491818	0.00484317	0.00489507	0.0049518	0.00488177	0.00484893	0.0049469	0.0049071	0.0049385	0.00494601	0.00493801	0.00490709	0.0049886	0.00493822	0.00495804	0.00491366	0.00487529	0.00488542	0.00487883		2	0.0202944	0.000718895	0.0354233
1794	0.00497225	0.0049537	0.0048409	0.00489495	0.00488794	0.00509244	0.00502612	0.00488549	0.00488917	0.00504495	0.00505234	0.00499991	0.00509368	0.00500322	0.0050827	0.00513903	0.00502766	0.0050626	0.00505829	0.00502338	0.00497445	0.00488285		3	0.0202944	0.00143303	0.070612
1792	0.00506378	0.00503568	0.00490928	0.00489486	0.00498679	0.00526092	0.00507445	0.00492871	0.0049936	0.00510722	0.00523929	0.00505763	0.00522418	0.00506166	0.00523283	0.00523144	0.00510434	0.00512666	0.00519633	0.00523416	0.00510844	0.00490793		4	0.0202944	0.00214245	0.105568
1790	0.00505972	0.00505267	0.00500561	0.00490463	0.00507436	0.00523264	0.00508394	0.00500081	0.0050916	0.00511174	0.00536143	0.00507442	0.00526561	0.00509933	0.00526418	0.00519579	0.00511435	0.00512024	0.00528666	0.00541387	0.00523321	0.00502119		5	0.0202944	0.0028472	0.140295
1788	0.00499903	0.00499862	0.00505585	0.00494005	0.00511063	0.00508183	0.00505744	0.00504866	0.00510695	0.00510535	0.00538991	0.00504734	0.00524225	0.00512211	0.00522641	0.00506571	0.00507278	0.00509479	0.00533148	0.00548125	0.0053127	0.0051927		6	0.0202944	0.00354733	0.174794
1786	0.00491563	0.00492049	0.00501171	0.0049607	0.00507895	0.00495856	0.00495898	0.00501045	0.00500704	0.00510548	0.00533839	0.00499545	0.00519299	0.00512615	0.00516499	0.00491228	0.00502353	0.00510435	0.00532848	0.005415	0.0053072	0.00527811		7	0.0202944	0.00493391	0.243117
1784	0.00483234	0.00487652	0.00492713	0.00493358	0.00500815	0.00492591	0.00482428	0.00492118	0.00486574	0.00510737	0.00524885	0.00496325	0.00515075	0.00512138	0.00508752	0.0048124	0.00499757	0.00515491	0.00531581	0.00528848	0.00521817	0.00521687		8	0.0202944	0.00630254	0.310556
1782	0.00482792	0.004904	0.00492658	0.00492249	0.00497927	0.00498925	0.00480175	0.00489835	0.00483561	0.00512837	0.00520848	0.00499645	0.00517173	0.00514694	0.00504379	0.0048429	0.00501918	0.00522279	0.00537115	0.00522598	0.00514399	0.00512069		9	0.0202944	0.00765357	0.377127
1780	0.0049533	0.00496933	0.00505621	0.00500564	0.00504314	0.00511303	0.00496775	0.00498579	0.00498136	0.00517853	0.00527638	0.00508084	0.00527829	0.0052326	0.00510167	0.00500959	0.00510667	0.00529324	0.00549864	0.0052755	0.00519404	0.00512628		10	0.0202944	0.00898733	0.442848
1778	0.0051257	0.00500868	0.00523518	0.00514829	0.00516216	0.00523434	0.00520971	0.00510636	0.0052068	0.00524531	0.00541528	0.00517085	0.00540882	0.00537498	0.00525665	0.00524145	0.00526477	0.00539204	0.00561628	0.00537928	0.00533794	0.00522199		11	0.0202944	0.0103042	0.507734
1776	0.00523996	0.00504538	0.00540251	0.00528387	0.00529773	0.00534533	0.00541839	0.00523125	0.00542401	0.00535095	0.00557308	0.00528999	0.00549942	0.00556843	0.00545484	0.00549649	0.00548259	0.00555765	0.00570408	0.0055044	0.00546186	0.00533395		12	0.0202944	0.0135242	0.6664
1774	0.0053003	0.00517457	0.00556958	0.00542701	0.00546056	0.00551536	0.0056087	0.00542987	0.00564034	0.00553827	0.00574486	0.00549879	0.00555298	0.00578955	0.00564668	0.00576964	0.0057016	0.00576009	0.00583092	0.0056775	0.00552755	0.00546445		13	0.0202944	0.0166452	0.820185
1772	0.00535711	0.00538623	0.0057043	0.00558657	0.00561651	0.00574931	0.00576517	0.00568268	0.00583214	0.00574443	0.00590043	0.00574231	0.00559498	0.00593987	0.00576578	0.00598471	0.00580732	0.00587521	0.00599795	0.00586907	0.00559912	0.00564085		14	0.0202944	0.0196716	0.96931
1770	0.00537909	0.0055035	0.00571506	0.00565257	0.00565673	0.00588133	0.00575462	0.00580987	0.00588989	0.00581185	0.00595812	0.00586046	0.00561996	0.00592795	0.00575974	0.00602234	0.00576322	0.0058439	0.00608412	0.00597496	0.00572701	0.00582046		15	0.0202944	0.0226076	1.11398
1768	0.00532695	0.00544312	0.00562779	0.00555811	0.005574	0.00579838	0.00557392	0.00575528	0.00580948	0.00573386	0.00591889	0.00583787	0.00564172	0.00583703	0.00570089	0.00592282	0.00571006	0.00580994	0.00606087	0.00598561	0.00587915	0.00596141		16	0.0202944	0.0254573	1.2544
1766	0.00527756	0.00534561	0.0055899	0.00543976	0.00551418	0.00564048	0.00545316	0.0057013	0.00575055	0.00567862	0.00589084	0.00583174	0.00571647	0.00583866	0.00574218	0.00587042	0.00579045	0.00593232	0.00605999	0.00600382	0.00601498	0.00608569		17	0.0202944	0.0282244	1.39075
1764	0.00531922	0.00533825	0.00565276	0.00545485	0.00557595	0.00559837	0.00555008	0.00577792	0.00581052	0.00572965	0.00592609	0.00592193	0.00585439	0.00596776	0.00593653	0.00595271	0.00596734	0.00617186	0.00614774	0.00607431	0.00612532	0.00618922		18	0.0202944	0.0335248	1.65192
1762	0.00542854	0.00539081	0.00572103	0.00558084	0.00570869	0.00567841	0.00575536	0.00590171	0.00591086	0.00581185	0.00597022	0.00603377	0.00599006	0.00611209	0.00618409	0.00608257	0.00609422	0.0063648	0.00623526	0.00615317	0.00620111	0.00622453		19	0.0202944	0.0385347	1.89878
1760	0.00554041	0.00544679	0.00572826	0.00569127	0.00582241	0.00575952	0.00587254	0.00595055	0.0059382	0.00586865	0.00598812	0.00609065	0.00607301	0.00618446	0.00634759	0.0061427	0.00609959	0.00642395	0.00624409	0.00621666	0.00623606	0.00620873		20	0.0202944	0.0432775	2.13248
1758	0.00565818	0.00553445	0.00573412	0.00574529	0.00589286	0.00578791	0.00587709	0.00594644	0.00589641	0.00595206	0.00602426	0.00610455	0.00612915	0.00621947	0.00638401	0.00613306	0.00605265	0.00640501	0.00622666	0.00627992	0.0062496	0.00622889		21	0.0202944	0.0477738	2.35404
1756	0.00578006	0.00565866	0.00577186	0.00578585	0.00591159	0.00580245	0.00587086	0.0059538	0.00584204	0.00606416	0.0060734	0.00607856	0.00618254	0.00626214	0.00634463	0.00612729	0.00603497	0.00637649	0.00623185	0.00630506	0.00624291	0.00624953		22	0.0202944	0.0520425	2.56438
1754	0.00584697	0.00571507	0.0057744	0.00581753	0.00585175	0.00581515	0.00587557	0.00593623	0.00577312	0.00609264	0.00603869	0.00596919	0.00620126	0.0062673	0.00628039	0.00614169	0.00604046	0.00633241	0.00619054	0.00622639	0.00616149	0.00609648
1752	0.00587354	0.0057008	0.005758	0.00585917	0.00581772	0.00585053	0.00589701	0.00589688	0.00573257	0.00602753	0.00593125	0.00584707	0.00620222	0.00621244	0.00623797	0.00616086	0.00606585	0.00629049	0.00607416	0.00610008	0.00598375	0.00574449
1750	0.00604674	0.00586217	0.00595038	0.00606249	0.00605998	0.00606641	0.00611863	0.00605771	0.00591762	0.00610739	0.00600795	0.00597102	0.00633027	0.00623488	0.00631603	0.00624597	0.00619886	0.00635924	0.00605829	0.00612802	0.00585038	0.00551366
1748	0.00649944	0.00641558	0.00652731	0.00660046	0.00671242	0.00661654	0.0067171	0.0066407	0.00652752	0.00660867	0.00656103	0.00652204	0.00673077	0.00654203	0.00662816	0.00653389	0.00654505	0.00662868	0.00636236	0.00643868	0.00600858	0.00576958
1746	0.00712376	0.00725053	0.00739511	0.00747627	0.00764422	0.00750931	0.00767829	0.0076197	0.00752864	0.00753086	0.00758523	0.00744634	0.00748293	0.00726081	0.00728854	0.00716855	0.00717108	0.00712737	0.00700007	0.00698531	0.00657807	0.00648801
1744	0.00789619	0.00825334	0.00852106	0.00870426	0.00883124	0.00877429	0.00900403	0.00898319	0.00892224	0.00886979	0.00902303	0.00871435	0.00865362	0.00844198	0.00841341	0.00826457	0.00818094	0.00798134	0.00796687	0.00782035	0.00757483	0.00751954
1742	0.00906459	0.00956629	0.0100786	0.0103997	0.0104469	0.0105148	0.010788	0.010822	0.0107626	0.0106999	0.0108737	0.0104014	0.0102881	0.0100599	0.00999002	0.00977176	0.00957796	0.00925959	0.00924023	0.00900772	0.00888494	0.00880213
1740	0.0108529	0.0113624	0.0121337	0.0125307	0.012497	0.0126583	0.0129339	0.012998	0.0128476	0.0128184	0.0129049	0.0123002	0.0121081	0.0118054	0.0116564	0.0113362	0.0110763	0.0106975	0.0105825	0.0103129	0.0101657	0.010104
1738	0.0134843	0.0138835	0.0147417	0.0150796	0.0149345	0.0151265	0.0152991	0.0152749	0.0149207	0.0148774	0.0147969	0.0140101	0.0136878	0.0132666	0.0129648	0.0125603	0.0122778	0.0118153	0.0115824	0.0112734	0.0110077	0.0109782
1736	0.0179475	0.018112	0.0187139	0.0187946	0.0184647	0.0185552	0.0184127	0.0180785	0.0173944	0.0171405	0.0167935	0.015618	0.0150661	0.014439	0.0139057	0.0134447	0.0130968	0.0124243	0.0120553	0.0116799	0.0112854	0.0111678
1734	0.026003	0.0257118	0.0256265	0.0252076	0.0246054	0.0243238	0.0235479	0.0226397	0.0214248	0.0206738	0.0198648	0.0179473	0.0169052	0.015852	0.0149682	0.0143995	0.0138461	0.0128366	0.0122628	0.0118095	0.0113053	0.0109626
1732	0.0376039	0.0366155	0.0355916	0.0345582	0.0336045	0.032696	0.031023	0.0293983	0.0274448	0.0260171	0.0245819	0.0216109	0.0197235	0.0180046	0.0166235	0.0158004	0.014924	0.013581	0.012718	0.012195	0.0116306	0.0110656
1730	0.0492983	0.0475967	0.0457866	0.0442804	0.0429326	0.0414257	0.0388581	0.0365935	0.0339025	0.0318563	0.0298731	0.0258233	0.0229642	0.0205728	0.0186765	0.017482	0.0163149	0.0147499	0.0135787	0.0130017	0.0124509	0.0117591
1728	0.0573193	0.0551718	0.0529589	0.0512396	0.0495462	0.047698	0.0444996	0.0418184	0.0386441	0.0362021	0.0339265	0.0290916	0.0254972	0.0226649	0.0204503	0.0189054	0.0175867	0.0159239	0.0145296	0.0139143	0.0134143	0.0126852
1726	0.0594179	0.0572459	0.0550062	0.0533218	0.0514649	0.0495648	0.0461791	0.0434097	0.040135	0.037623	0.0353193	0.0302662	0.0264286	0.0234847	0.0212723	0.0195552	0.0182466	0.0166238	0.0151998	0.0145488	0.014092	0.0134455
1724	0.0554449	0.0536327	0.0516249	0.0501649	0.0483977	0.0466683	0.0435709	0.0410745	0.0380483	0.035805	0.0336646	0.0290727	0.0255408	0.0227902	0.0208351	0.0192285	0.0180611	0.0166169	0.0153887	0.0146841	0.0142685	0.0138376
1722	0.0479309	0.0466435	0.0449832	0.0438247	0.0423232	0.0408961	0.0383509	0.0363291	0.0337368	0.0319292	0.0300697	0.0263927	0.023521	0.0211399	0.0195086	0.0182505	0.0172806	0.0160731	0.015151	0.0143868	0.0140303	0.0138224
1720	0.0397752	0.0389554	0.0377019	0.0368112	0.0356369	0.0345861	0.0326078	0.0310278	0.0289377	0.0275187	0.0260456	0.0233766	0.0212452	0.0193	0.017971	0.0171434	0.0163552	0.0153627	0.0147055	0.0139396	0.0136309	0.0134864
1718	0.0320295	0.0315197	0.0307476	0.0300583	0.0292358	0.0286104	0.0271593	0.0259042	0.0243808	0.0232615	0.0222811	0.020514	0.0190279	0.01758	0.0166077	0.0161453	0.0155007	0.0147391	0.0142858	0.013645	0.0133247	0.0130939
1716	0.0249891	0.0246396	0.024333	0.0238348	0.0233531	0.0231241	0.0222234	0.021279	0.0203321	0.0195348	0.0190289	0.0179952	0.0169727	0.0160701	0.0155019	0.0152837	0.0147636	0.0143359	0.0141064	0.0136916	0.013348	0.0131098
1714	0.0195253	0.0192773	0.0192547	0.0189925	0.0187619	0.0187989	0.0184376	0.0178725	0.0173762	0.0169556	0.0167527	0.0162653	0.015551	0.0151155	0.0148004	0.0147591	0.0143661	0.0143156	0.0143062	0.0141073	0.0138334	0.0137803
1712	0.015822	0.0157076	0.0158173	0.0158141	0.0157588	0.0159452	0.0160463	0.0158658	0.0157087	0.0156424	0.0156386	0.01557	0.0151538	0.0150361	0.0147883	0.0149131	0.0146557	0.0149028	0.0150041	0.0149854	0.0148457	0.0149956
1710	0.0131239	0.013204	0.0134514	0.0136845	0.0138175	0.0141201	0.0146402	0.0148027	0.0149884	0.0152511	0.0154975	0.0158254	0.0158236	0.0159424	0.0157772	0.0160522	0.0159386	0.0164028	0.0165171	0.016688	0.0166478	0.0168686
1708	0.0109333	0.011254	0.011727	0.0121525	0.012515	0.0129746	0.0139218	0.0144426	0.015008	0.0156402	0.0162264	0.0170106	0.0175699	0.017961	0.0180685	0.0184714	0.0185122	0.0191663	0.0193275	0.0196803	0.0196942	0.0198533
1706	0.00930664	0.00989529	0.0106529	0.0112432	0.011823	0.0125422	0.0139182	0.014912	0.0158588	0.0169245	0.0178767	0.0192337	0.0204603	0.0212633	0.0218362	0.0223879	0.0226034	0.0234287	0.0237822	0.024238	0.0243381	0.0243575
1704	0.00829498	0.00919016	0.0102355	0.0110097	0.0117721	0.0128881	0.0146745	0.016283	0.0176417	0.0191585	0.0204846	0.0225951	0.02458	0.0259759	0.0270971	0.0278896	0.0283254	0.0292712	0.029939	0.0304125	0.0306582	0.0304939
1702	0.00763499	0.00888209	0.0102039	0.0112138	0.0121887	0.013796	0.0160016	0.0182453	0.0201327	0.0220658	0.0238563	0.0269261	0.0297821	0.0318873	0.0335593	0.0347096	0.0354324	0.0364409	0.0374307	0.0379384	0.0382873	0.0379276
1700	0.007109	0.00865869	0.0102187	0.0114723	0.0126934	0.0147203	0.0173547	0.0199988	0.0224602	0.0247219	0.0270666	0.0310947	0.0347873	0.0375155	0.0396491	0.0411928	0.042222	0.0432687	0.0444915	0.0451435	0.0454554	0.0449832
1698	0.00678448	0.00840425	0.010057	0.0114393	0.0127575	0.0149056	0.0178267	0.0204321	0.0231867	0.0255793	0.0282908	0.0327903	0.0368567	0.0398473	0.0421561	0.0439443	0.0451464	0.0462425	0.0475571	0.0483883	0.0486261	0.0482365
1696	0.00662901	0.00803508	0.00955469	0.0108704	0.0120077	0.0139236	0.0167868	0.0190139	0.0215679	0.0238055	0.0264013	0.0306315	0.034349	0.037148	0.0392547	0.040993	0.0421182	0.0432818	0.0445268	0.0453845	0.0456888	0.0455493
1694	0.0063988	0.00745072	0.00868199	0.00978027	0.0106182	0.0121146	0.0145778	0.0163448	0.0183791	0.0202506	0.0223363	0.025851	0.0287648	0.0310712	0.0327803	0.0342088	0.0350802	0.0362989	0.0373462	0.0380409	0.0384925	0.0386251
1692	0.00607413	0.00677924	0.00771048	0.00852677	0.00914771	0.0102279	0.0121383	0.0134955	0.0149596	0.0164299	0.0179149	0.0206616	0.0227367	0.0244604	0.0257818	0.0268027	0.0274148	0.0285978	0.0294018	0.0298771	0.0303838	0.0306829
1690	0.00584885	0.00628514	0.0069984	0.00751906	0.00802743	0.0088041	0.0101852	0.0111909	0.0121639	0.0133218	0.014307	0.0164015	0.0178263	0.019044	0.0200397	0.020723	0.0211979	0.0221568	0.022731	0.0230601	0.0234763	0.0237593
1688	0.00578022	0.00606124	0.00664537	0.00687913	0.00730362	0.00791218	0.00885176	0.00953454	0.0101264	0.0110744	0.0116791	0.013246	0.0142398	0.0151208	0.0158148	0.0163208	0.0168093	0.0173163	0.0176618	0.0179584	0.0181813	0.0182358
1686	0.00570973	0.00594169	0.00644116	0.00644046	0.00677383	0.00729245	0.00786376	0.00823556	0.00857322	0.00935367	0.00964772	0.0107968	0.0115254	0.0122269	0.0126169	0.0130883	0.0136546	0.0136156	0.0136934	0.0140159	0.0140104	0.0136957
1684	0.00547521	0.00571737	0.00611462	0.00601379	0.00628896	0.00669113	0.00696617	0.0070891	0.00731313	0.00790542	0.00795994	0.00881406	0.00937223	0.00993194	0.0100536	0.0105138	0.01105	0.010728	0.0105456	0.0108366	0.0106725	0.0100856
1682	0.00516723	0.00540652	0.00570363	0.00562911	0.00588538	0.0061235	0.00622776	0.00624793	0.00645525	0.00684682	0.00678507	0.00745052	0.00788287	0.00824633	0.00819253	0.00856046	0.00890953	0.00875118	0.00844652	0.00861998	0.00844851	0.00788788
1680	0.00493242	0.00515873	0.00539858	0.00536773	0.00560542	0.00568133	0.0057421	0.00579375	0.00601848	0.00624418	0.00616874	0.00668883	0.00703109	0.00720531	0.00706618	0.00729366	0.00746218	0.00758495	0.00730778	0.0073871	0.00728294	0.00693397
1678	0.00477457	0.00501548	0.00520532	0.00520103	0.00541321	0.00535647	0.00545361	0.00556977	0.00577987	0.00588877	0.00582865	0.00625783	0.00655139	0.00662636	0.00646706	0.00658003	0.00668571	0.00686296	0.00666638	0.00673527	0.00663225	0.00648377
1676	0.00473756	0.00499127	0.00508895	0.00516255	0.00535911	0.0051752	0.00534606	0.00550925	0.00565377	0.00567647	0.00562515	0.00603134	0.0062844	0.00636927	0.0062464	0.00631231	0.00644314	0.00641631	0.00630899	0.00639781	0.00618079	0.00614376
1674	0.00491204	0.00510184	0.00509117	0.00532793	0.00549676	0.00520084	0.00544356	0.00563182	0.00567515	0.00562355	0.0055899	0.00604115	0.00623249	0.00638824	0.00631711	0.00639772	0.00655253	0.00623147	0.00621214	0.00627782	0.00591735	0.00589313
1672	0.00518395	0.00523565	0.00518388	0.00556166	0.00565002	0.00532487	0.00559747	0.00579479	0.00577189	0.00564462	0.00564452	0.00611598	0.00623224	0.00646594	0.00639886	0.00653037	0.00667135	0.00619345	0.00623285	0.00622543	0.00583534	0.00573247
1670	0.00526256	0.00521789	0.00519847	0.00556095	0.00554293	0.00530732	0.0055517	0.00573578	0.00573975	0.00555365	0.00556521	0.00594881	0.00601915	0.00628884	0.00617802	0.0063322	0.0064343	0.00603995	0.00606346	0.00600738	0.00573901	0.00554031
1668	0.00509396	0.00506977	0.00505971	0.00528969	0.00521186	0.00512077	0.00530138	0.00544187	0.00552817	0.00533464	0.00530658	0.00554222	0.00561157	0.00585028	0.00572625	0.00583079	0.00587675	0.00570976	0.00567442	0.00562753	0.00551162	0.0052948
1666	0.0049172	0.00496562	0.00489859	0.00502339	0.00494477	0.00496463	0.00507503	0.00514806	0.00529555	0.00514267	0.00505729	0.00518729	0.00527102	0.00542125	0.0053554	0.00536694	0.00534787	0.0053697	0.00532702	0.00530366	0.00525075	0.00511668
1664	0.00487933	0.00495479	0.0048402	0.00492738	0.0048703	0.0049339	0.00497737	0.00497706	0.00513774	0.00503852	0.004937	0.00502425	0.0051124	0.00514943	0.00515708	0.00509819	0.00504523	0.0051149	0.00514065	0.00511423	0.00503888	0.00503467
1662	0.00489505	0.00493247	0.00486458	0.00489761	0.0048807	0.00492857	0.00491559	0.00486462	0.00499442	0.00494824	0.00489106	0.00494304	0.00502702	0.00496764	0.00498283	0.00491607	0.00488891	0.00491413	0.00499493	0.00494784	0.00485771	0.00495867
1660	0.00488783	0.00486365	0.0049176	0.00483975	0.00489406	0.00488122	0.00484445	0.00479941	0.00484389	0.00485891	0.00487574	0.00486749	0.00493181	0.0048338	0.00479219	0.00477198	0.00479153	0.00479045	0.00483371	0.00478102	0.00474921	0.0048731
1658	0.00492401	0.00484434	0.00501543	0.00485339	0.00497085	0.00487107	0.00485936	0.00488096	0.00479247	0.00486018	0.00494285	0.00487912	0.00487686	0.00481927	0.00474967	0.0047955	0.00482663	0.00482297	0.0047811	0.00476236	0.00483087	0.00485699
1656	0.00504043	0.00492259	0.00517196	0.00504345	0.00516022	0.00497183	0.00501517	0.00511441	0.00491511	0.00498156	0.00509983	0.005027	0.00490233	0.00494789	0.00496979	0.00505593	0.00507606	0.00498403	0.0049103	0.00498757	0.00511894	0.00492246
1654	0.00512384	0.0050133	0.00530711	0.00531847	0.0053908	0.00513875	0.00520785	0.00531534	0.00512262	0.00512193	0.00522254	0.00519349	0.00496988	0.00511401	0.00533834	0.00538474	0.00544223	0.00511131	0.00508731	0.0053383	0.00545097	0.00499086
1652	0.00506802	0.00502514	0.00531166	0.00544254	0.00553349	0.00526048	0.00527361	0.00529644	0.005219	0.00516761	0.00518641	0.00520635	0.00505765	0.00520941	0.0055668	0.00549255	0.0056522	0.00509243	0.00510689	0.00554355	0.00559595	0.00503573
1650	0.00500525	0.00502901	0.00523756	0.00538817	0.00556191	0.00530521	0.0052348	0.0051837	0.00517691	0.00516306	0.00509393	0.00511006	0.00519956	0.00529083	0.00554586	0.00539908	0.00561681	0.00505835	0.00502672	0.00553054	0.00554689	0.00513012

## Sheet: NBS_TBABr
Wavenumbers [1/cm]	1	2	3	4	5	6	7	8	9	10	11	12	13	14	15	16	17	18	19	20	21	22
1800	0.00513235	0.00511266	0.00503161	0.0049506	0.00501062	0.00497859	0.00490025	0.00504124	0.0049827	0.00502889	0.00495547	0.00496712	0.00491776	0.00507592	0.00487352	0.00501379	0.00505289	0.00482867	0.00495278	0.0047967	0.00498555	0.00505775			H (M)	G (M)	eq (G/H)
1798	0.00521474	0.00513512	0.00515945	0.00505404	0.00509318	0.00500776	0.00503464	0.0050919	0.00509491	0.00504236	0.0050192	0.00507353	0.00502269	0.00512407	0.00500261	0.00511136	0.0051848	0.00493848	0.00504121	0.00488454	0.00507262	0.00512431		1	0.0182043	0	0
1796	0.00524358	0.00515884	0.00520148	0.00513159	0.00508916	0.00502262	0.00506124	0.00514987	0.00515236	0.00506112	0.0051003	0.00515054	0.00511546	0.00514081	0.00509557	0.0051635	0.00524292	0.00503264	0.00509295	0.00500005	0.00512272	0.0051637		2	0.0182043	0.000697011	0.0382883
1794	0.00519708	0.00519403	0.00518667	0.00518548	0.00506964	0.00505292	0.00507558	0.00519579	0.00519065	0.00514195	0.0052138	0.00523021	0.00519368	0.00518087	0.00514404	0.00517364	0.00524383	0.00510659	0.00515621	0.00515956	0.00517441	0.00522046		3	0.0182043	0.00138941	0.076323
1792	0.00507132	0.00516364	0.00511538	0.00515719	0.00505141	0.00509418	0.00510629	0.00514041	0.00516373	0.00518493	0.00524102	0.00522061	0.00517228	0.00517505	0.0051126	0.00510929	0.00514115	0.00512546	0.00518134	0.00523043	0.00515523	0.00520935		4	0.0182043	0.00207723	0.114107
1790	0.00491362	0.00501513	0.00498054	0.00501888	0.00500032	0.00508711	0.00508002	0.00497143	0.00501034	0.00507728	0.00507786	0.00503511	0.00500618	0.00502103	0.00499977	0.0049586	0.00492168	0.00505858	0.00506407	0.00510607	0.00499355	0.00502642		5	0.0182043	0.00276053	0.151642
1788	0.00475895	0.00478605	0.00478799	0.00482015	0.00489929	0.00496717	0.00493178	0.0047847	0.0047825	0.00485187	0.00479468	0.00475235	0.00480025	0.00476823	0.00486546	0.00478799	0.0046897	0.00492974	0.00482905	0.00488362	0.0047837	0.00473725		6	0.0182043	0.00343935	0.188931
1786	0.00460072	0.00454719	0.0045685	0.00463267	0.00479701	0.00476825	0.00471046	0.0046659	0.0046055	0.00464049	0.00455314	0.00453764	0.00468946	0.00458995	0.00477996	0.00469563	0.00457593	0.00480851	0.00463517	0.00473572	0.00469777	0.00451851		7	0.0182043	0.00478372	0.26278
1784	0.00448496	0.00437694	0.0044152	0.00452998	0.00478624	0.00463349	0.00455726	0.00465748	0.00457133	0.00456197	0.00447046	0.0045027	0.00472088	0.00461958	0.00479261	0.00474525	0.00464359	0.00478024	0.00461273	0.00473623	0.00480621	0.0044949		8	0.0182043	0.00611069	0.335673
1782	0.00452357	0.00435996	0.00445497	0.00457448	0.00491427	0.00469013	0.00460304	0.00477783	0.00469951	0.00466551	0.00457744	0.00465937	0.00486562	0.00484929	0.00490449	0.00492129	0.00486546	0.00490539	0.00476532	0.00485577	0.00503333	0.00468187		9	0.0182043	0.00742059	0.407629
1780	0.00472772	0.00449574	0.00468627	0.00472588	0.00509264	0.00488066	0.00482842	0.00498049	0.0049238	0.00488119	0.00479407	0.00490723	0.0050553	0.00512844	0.00503374	0.00511906	0.00513075	0.00514764	0.00498515	0.00502366	0.00524581	0.00498899		10	0.0182043	0.00871375	0.478665
1778	0.00494609	0.00467163	0.00494298	0.0048517	0.00519061	0.00502936	0.00508195	0.00517924	0.00514815	0.00508913	0.00500667	0.0051253	0.00523181	0.00532211	0.00509772	0.00525401	0.00533863	0.0054004	0.00518398	0.00520832	0.00540494	0.00530604		11	0.0182043	0.00999049	0.548799
1776	0.00505511	0.0047977	0.00509849	0.00488848	0.00520875	0.00507807	0.00526045	0.00534897	0.00532311	0.0052477	0.00518803	0.00528441	0.00537589	0.00542803	0.00512767	0.00535108	0.00547008	0.00560135	0.00535959	0.00543543	0.00557122	0.00558054		12	0.0182043	0.0131125	0.720298
1774	0.00506546	0.00486479	0.00516724	0.00489323	0.0052513	0.00510297	0.00535285	0.00550705	0.00543542	0.0053655	0.00536822	0.00541011	0.0054764	0.00549814	0.00522615	0.00547316	0.00553373	0.00574103	0.0055153	0.00570037	0.00576608	0.00578382		13	0.0182043	0.0161385	0.886521
1772	0.00502884	0.00486818	0.0052024	0.0049288	0.00534652	0.00514873	0.00535413	0.00560959	0.00547638	0.00539872	0.00552021	0.00548367	0.00550772	0.00554138	0.0054096	0.00560836	0.00551671	0.00579962	0.00561605	0.00589201	0.00590767	0.00588326		14	0.0182043	0.0190728	1.04771
1770	0.00495858	0.00479012	0.00519352	0.00496913	0.0053874	0.00517851	0.00526018	0.00558811	0.00546679	0.00530111	0.00556318	0.00546018	0.00548392	0.00555678	0.00556124	0.00569545	0.00544883	0.00576967	0.00567008	0.00590871	0.00594044	0.00590236		15	0.0182043	0.0219194	1.20408
1768	0.00491068	0.0047022	0.0051407	0.0049913	0.00533297	0.00521837	0.00515873	0.00551487	0.00548258	0.00518078	0.00551357	0.00539838	0.0055116	0.00561296	0.00563181	0.00576953	0.00545439	0.00574612	0.00576923	0.00586047	0.00597575	0.00594923		16	0.0182043	0.0246824	1.35586
1766	0.00499005	0.00473563	0.00512468	0.0050483	0.00529659	0.00535711	0.00518231	0.00554846	0.00558617	0.00522369	0.00549784	0.00543625	0.00569847	0.00578092	0.00573481	0.00593749	0.00563426	0.00587074	0.0059732	0.00596884	0.00616738	0.00611492		17	0.0182043	0.0273653	1.50323
1764	0.00517949	0.00489982	0.00519433	0.00515499	0.00535189	0.00556077	0.00533729	0.0057068	0.00574156	0.00545879	0.00558802	0.00561067	0.00601326	0.00601891	0.00595454	0.00620015	0.00593963	0.00616364	0.00623587	0.00628484	0.00651025	0.00637924		18	0.0182043	0.0325043	1.78553
1762	0.00532385	0.00506125	0.00529651	0.00524285	0.00543799	0.00567786	0.00548948	0.00585471	0.00584835	0.00573445	0.00573812	0.0058124	0.00629682	0.00621528	0.00621953	0.00642596	0.00622709	0.00648762	0.0064796	0.0066356	0.00684251	0.00664047		19	0.0182043	0.0373617	2.05236
1760	0.0053589	0.0051314	0.00538166	0.00529401	0.0054991	0.00566318	0.00554795	0.00591522	0.00586995	0.00591545	0.00588251	0.00593722	0.00642663	0.00633127	0.00641382	0.00651476	0.00641231	0.00668662	0.00668105	0.00682716	0.00700866	0.00681958		20	0.0182043	0.0419601	2.30495
1758	0.00543394	0.00518022	0.00548848	0.00540278	0.00559214	0.00566595	0.00559147	0.00598236	0.00590372	0.0060305	0.00602898	0.00602537	0.00645719	0.00644604	0.00653974	0.00654073	0.00653775	0.00674978	0.00686413	0.00686827	0.0070192	0.0069429		21	0.0182043	0.0463196	2.54443
1756	0.00566511	0.005285	0.00563781	0.00559985	0.00576853	0.00578928	0.00572538	0.00614723	0.00606161	0.00617665	0.00622289	0.00617936	0.00652893	0.00662576	0.00668831	0.00665485	0.00667515	0.00680058	0.00703864	0.00693424	0.00702749	0.00710523		22	0.0182043	0.0504583	2.77178
1754	0.00593692	0.00540645	0.00575473	0.00576704	0.00597388	0.00593748	0.00591496	0.00634699	0.0063256	0.00636503	0.00647444	0.00639886	0.00666506	0.00682727	0.00687598	0.0068766	0.00682254	0.0069163	0.0071784	0.00711362	0.0071308	0.00733888
1752	0.00611906	0.00554207	0.00581226	0.00584501	0.00616873	0.00603227	0.00608833	0.00649777	0.0065894	0.00656271	0.00676503	0.0066055	0.00677945	0.00697565	0.0070223	0.00708475	0.00694589	0.00705114	0.00724209	0.00732379	0.00727464	0.00755905
1750	0.00630666	0.00583384	0.00595652	0.00598683	0.00641855	0.00619828	0.00628813	0.00664019	0.00677495	0.00677954	0.0070541	0.0067642	0.00683241	0.007058	0.00706563	0.00715835	0.0070421	0.00711642	0.00720043	0.00742676	0.00733457	0.00763598
1748	0.00667877	0.00634512	0.00633147	0.00634476	0.00676165	0.00657616	0.00659796	0.00685831	0.00690771	0.00701866	0.0072716	0.00690142	0.00688755	0.00711895	0.00704582	0.00710664	0.00711442	0.00709646	0.00707949	0.00737444	0.00727101	0.00755084
1746	0.00724548	0.00693601	0.00687613	0.00683904	0.00714252	0.00709644	0.00700495	0.00715828	0.00710224	0.00724427	0.00741459	0.00703063	0.00700228	0.0071988	0.0070483	0.00704266	0.00714827	0.0070692	0.00696108	0.00723468	0.00716985	0.00742743
1744	0.00803117	0.0076053	0.00754766	0.00742621	0.00763133	0.00770508	0.00752368	0.00759036	0.00750199	0.00751308	0.00763966	0.00718132	0.00719675	0.00734371	0.00713834	0.00706662	0.00717431	0.00712325	0.0069237	0.00710792	0.00711575	0.00737034
1742	0.00924561	0.00863607	0.00851137	0.00831872	0.00848545	0.0085587	0.00830942	0.00833118	0.00822614	0.00801933	0.00816863	0.00749005	0.00753943	0.00763622	0.00737983	0.0072538	0.00729177	0.00730679	0.0070206	0.00710433	0.00714595	0.0074036
1740	0.0110506	0.0102854	0.00998206	0.00976268	0.00990085	0.00985816	0.00953363	0.00953286	0.00932356	0.0089481	0.00910925	0.00816131	0.00814298	0.00815533	0.00782723	0.00766894	0.0075877	0.00762187	0.00729305	0.00731818	0.0073123	0.00754483
1738	0.013608	0.0127714	0.012266	0.0120045	0.0120699	0.0118673	0.0114358	0.0113916	0.0109859	0.0105094	0.0105809	0.00943569	0.009177	0.00902917	0.00857477	0.00841165	0.00814435	0.00811232	0.00782457	0.00779617	0.00773128	0.00788668
1736	0.0178226	0.0169796	0.0163291	0.0159054	0.0158375	0.0154511	0.0148161	0.0146512	0.0140031	0.0133616	0.0131988	0.0118111	0.011087	0.0106629	0.00996738	0.00976415	0.00925291	0.009026	0.00881226	0.00864209	0.00858229	0.00861583
1734	0.0253986	0.0245038	0.023716	0.0229799	0.0226872	0.0220316	0.0209845	0.0205161	0.0195583	0.0185433	0.0179861	0.0159884	0.0145621	0.0136632	0.0125673	0.0121286	0.0113989	0.0107455	0.0104542	0.0100554	0.00998545	0.00988439
1732	0.036476	0.0353401	0.0343287	0.0332351	0.0326014	0.0315606	0.0298921	0.0288627	0.0274848	0.0259048	0.0248455	0.0217769	0.019546	0.0179381	0.016352	0.0154046	0.0145353	0.0132394	0.012589	0.0120063	0.011759	0.0115304
1730	0.0479503	0.046398	0.0451304	0.0437545	0.0427544	0.0413092	0.0390113	0.0373134	0.0354728	0.0333211	0.0317948	0.0276085	0.0246816	0.0223082	0.0202887	0.0187679	0.0177449	0.0158661	0.014749	0.0140789	0.0135547	0.0131865
1728	0.0561145	0.0541703	0.0527745	0.0512308	0.0499918	0.0482682	0.0455387	0.0433609	0.0411596	0.0386082	0.0367783	0.0319058	0.0285152	0.0256062	0.0233053	0.021437	0.0201751	0.0180441	0.0166168	0.0158787	0.0151983	0.0146838
1726	0.058504	0.056406	0.055102	0.0535479	0.0522773	0.0505191	0.0476696	0.0454104	0.0430776	0.0404389	0.0385353	0.0336281	0.0301072	0.0270933	0.0247351	0.0228847	0.0214009	0.0194199	0.0179293	0.0171398	0.0165078	0.0159231
1724	0.0547417	0.052802	0.0517734	0.0503927	0.0492563	0.0477418	0.04511	0.0431405	0.0409613	0.0386053	0.0368517	0.0324875	0.0292369	0.0265396	0.024386	0.022864	0.0213327	0.0197808	0.018425	0.0176988	0.0172122	0.0167201
1722	0.047284	0.045699	0.045017	0.0439048	0.0429655	0.0418676	0.0396953	0.0381524	0.0363467	0.0345138	0.0330584	0.0294662	0.0267906	0.0246129	0.0228312	0.0217472	0.0203662	0.0192982	0.0182085	0.0176896	0.0173104	0.017034
1720	0.0391197	0.0379268	0.0375736	0.0367044	0.0359874	0.0353127	0.0337018	0.0325552	0.031217	0.0299342	0.0288697	0.0259568	0.0239836	0.0223342	0.0209262	0.0202173	0.0190841	0.0184158	0.0176998	0.0174306	0.0171239	0.0170369
1718	0.0314148	0.030582	0.0304806	0.0298298	0.029392	0.0290248	0.027981	0.0272308	0.0263477	0.0255132	0.0249215	0.0225744	0.0213253	0.020179	0.019072	0.0186315	0.0177701	0.0174183	0.0171127	0.0170223	0.0168584	0.0168298
1716	0.0244502	0.0239215	0.0239518	0.0235776	0.0234497	0.0232306	0.0226781	0.0223608	0.0218379	0.0213242	0.0211956	0.0194802	0.0188864	0.018198	0.017375	0.0171253	0.0165291	0.0164383	0.01637	0.0163606	0.0164306	0.0163884
1714	0.018989	0.0186805	0.0187802	0.0187119	0.0188284	0.0186596	0.0184901	0.0185376	0.0182778	0.0179954	0.0181764	0.0171765	0.0170553	0.0167017	0.016195	0.0160813	0.015689	0.0157921	0.0156939	0.0156991	0.0159735	0.0159626
1712	0.0152452	0.0150865	0.0153097	0.0154774	0.0157614	0.0156405	0.0158299	0.0161273	0.0161236	0.016051	0.0164103	0.0160579	0.0162442	0.0161379	0.0159355	0.0159159	0.0156545	0.0159005	0.0157056	0.0156876	0.0160759	0.0161037
1710	0.0125883	0.0125563	0.0129806	0.0133212	0.0137486	0.013721	0.0143441	0.0148555	0.0151673	0.0153437	0.0158718	0.0160671	0.0165327	0.0167156	0.0167699	0.016832	0.016713	0.0171016	0.0169257	0.0169042	0.0173541	0.0173269
1708	0.0105779	0.0106782	0.0113215	0.0118419	0.012415	0.0125453	0.0136884	0.0144356	0.0151101	0.0156085	0.0163492	0.0170928	0.0179269	0.0185047	0.0187986	0.0189813	0.0191033	0.0196677	0.0196362	0.0197151	0.0201956	0.020031
1706	0.00921552	0.00945102	0.0102981	0.0110164	0.0117694	0.0121344	0.0138129	0.0148307	0.01586	0.0167612	0.0177375	0.0191355	0.0204545	0.021504	0.0220931	0.0224861	0.0229335	0.023721	0.0239042	0.0241876	0.0246675	0.0244168
1704	0.00843151	0.00880103	0.00988915	0.0107662	0.0118049	0.0124831	0.0146529	0.0160392	0.0173986	0.0187882	0.0200222	0.0222114	0.0241032	0.0256846	0.0266897	0.0273924	0.0281523	0.0292388	0.029711	0.0301756	0.0306572	0.0304834
1702	0.00785057	0.00837717	0.00978314	0.0107672	0.0122117	0.0132632	0.0158826	0.0178241	0.0195292	0.0214887	0.0230557	0.0261197	0.0286674	0.0308645	0.032418	0.0334758	0.0344813	0.0359677	0.036829	0.0373554	0.0378998	0.0379364
1700	0.00720029	0.00793863	0.00962675	0.0107358	0.0125336	0.0139445	0.0169449	0.0195127	0.021572	0.0240823	0.0260479	0.0299113	0.0331567	0.0359523	0.0380808	0.0394323	0.0406297	0.042543	0.04379	0.044336	0.0450161	0.0452551
1698	0.00663158	0.00759547	0.00933764	0.0105979	0.0124507	0.0140575	0.0172277	0.0200974	0.0223708	0.0251785	0.0274246	0.0317493	0.0354995	0.0385863	0.0410576	0.0425583	0.0438636	0.0460221	0.0474474	0.0480843	0.0488962	0.0492052
1696	0.00630261	0.00737086	0.00892797	0.0102345	0.0118561	0.0133862	0.0163828	0.0190219	0.0212245	0.0239167	0.026135	0.0304153	0.0341808	0.0371127	0.0395057	0.0410259	0.0422744	0.0443606	0.0457376	0.0464433	0.0472855	0.0475533
1694	0.00603334	0.00698488	0.00827209	0.0094572	0.0107722	0.0120124	0.0145537	0.0166887	0.0185997	0.0208497	0.0227709	0.0265857	0.0298866	0.0324054	0.0344113	0.0358583	0.0369014	0.0386978	0.0399549	0.0405768	0.0413239	0.0415478
1692	0.00570558	0.00635075	0.0073782	0.00837187	0.0094033	0.0103066	0.0123118	0.013974	0.0155451	0.0172261	0.0187599	0.0219045	0.0245527	0.026603	0.028169	0.0294534	0.0302426	0.0317084	0.0328425	0.033292	0.033873	0.0341073
1690	0.00542715	0.00568434	0.00648276	0.00730034	0.00807254	0.00872566	0.0102833	0.0115823	0.0128525	0.0140082	0.0152007	0.0176556	0.0197192	0.0213107	0.0225464	0.0236062	0.0241445	0.0253464	0.0263509	0.026648	0.027085	0.0273721
1688	0.00525682	0.00513557	0.00575387	0.00638329	0.00696153	0.00748099	0.00872323	0.00974487	0.0107247	0.0114973	0.0124382	0.0142694	0.015871	0.0170293	0.0180551	0.0188968	0.0191729	0.0202097	0.0211045	0.0212762	0.0216676	0.0220048
1686	0.0050791	0.00465413	0.00514344	0.00552573	0.00603761	0.00647798	0.00747083	0.00831306	0.00897404	0.00952359	0.0102808	0.0115748	0.0127558	0.0135484	0.0143929	0.0150966	0.0151151	0.0160565	0.016882	0.0169342	0.0173683	0.0177003
1684	0.00481735	0.00424635	0.00459364	0.00475699	0.00527749	0.00561656	0.00634103	0.00711989	0.00751639	0.00793215	0.00852752	0.00940511	0.0101885	0.010745	0.0113373	0.0120046	0.0118846	0.0127193	0.013444	0.0134538	0.013885	0.0141424
1682	0.00465308	0.0041285	0.00426484	0.00437973	0.00482745	0.0050563	0.00551522	0.00626427	0.00657328	0.00685784	0.00730259	0.00791386	0.00846788	0.0089233	0.00920913	0.0098669	0.0097916	0.0104663	0.0109779	0.0110901	0.0113682	0.011546
1680	0.00470865	0.00431929	0.00426203	0.0044254	0.00472476	0.00489027	0.00517101	0.00583889	0.00616117	0.00633149	0.00667079	0.00710536	0.00766699	0.0080948	0.00812092	0.00870564	0.00873412	0.00926866	0.00953333	0.00978101	0.00985641	0.0100054
1678	0.0048268	0.00453211	0.00442524	0.00456758	0.00478957	0.0049149	0.00512311	0.00569724	0.00598681	0.00610383	0.00639584	0.00667498	0.0073589	0.00778606	0.00765455	0.00808605	0.0081576	0.00864918	0.00876223	0.0090488	0.00900372	0.00915854
1676	0.00485207	0.00455408	0.00456312	0.00459015	0.00486462	0.00491187	0.00512784	0.00566121	0.00586954	0.00596408	0.00624125	0.0064044	0.00717969	0.00759366	0.0074243	0.00767368	0.00771977	0.00825619	0.00835036	0.00859008	0.00852712	0.00868995
1674	0.0048083	0.00442887	0.0046071	0.00451955	0.00490264	0.00482958	0.00510282	0.00563863	0.00581244	0.00585059	0.00611089	0.0062597	0.00702168	0.00736463	0.00726816	0.00740713	0.00739304	0.00796998	0.00813527	0.00832091	0.00830616	0.00845713
1672	0.00478746	0.00431429	0.00456107	0.00442114	0.0048774	0.00471023	0.00504898	0.0055594	0.00575592	0.00571869	0.00595494	0.00618148	0.00683611	0.00705992	0.00707384	0.00725228	0.00716737	0.00767742	0.00793683	0.00808106	0.00815604	0.00825524
1670	0.00475847	0.00421261	0.00440448	0.00423658	0.00472093	0.00453653	0.0049102	0.00533143	0.00550104	0.00546138	0.00569288	0.00598672	0.00650075	0.00663094	0.00669904	0.00701388	0.0068803	0.00721796	0.00753383	0.00762792	0.00781052	0.00781495
1668	0.00463522	0.00401483	0.00414368	0.00395211	0.00442544	0.00427477	0.00464846	0.00494535	0.00501947	0.00505954	0.00531027	0.00560118	0.00600235	0.00609483	0.00615084	0.00655265	0.00643379	0.00660618	0.00689035	0.00697359	0.00722133	0.00712714
1666	0.00445137	0.00374954	0.00388366	0.00372367	0.00411093	0.00400428	0.00436	0.00453554	0.00456187	0.00466317	0.0049207	0.00518036	0.00553208	0.00559849	0.00563768	0.0059999	0.00594242	0.00605598	0.00621267	0.00638121	0.00660488	0.0064568
1664	0.00430542	0.00355777	0.00372836	0.00366463	0.00390446	0.00384152	0.00415955	0.00424595	0.00431604	0.00440679	0.00463576	0.00488017	0.00523885	0.00527914	0.00532271	0.00556729	0.00554172	0.00570132	0.00570489	0.00598396	0.00612729	0.00597711
1662	0.00422979	0.00350114	0.00367895	0.00369062	0.0038298	0.00379737	0.00404338	0.00409925	0.00420412	0.00427059	0.00446738	0.00469143	0.00506193	0.0051429	0.00516835	0.00530725	0.00525431	0.00547691	0.0054057	0.00568393	0.00576449	0.00564673
1660	0.00420364	0.00352728	0.00368821	0.00368272	0.00384295	0.00379851	0.00395154	0.00403108	0.00410238	0.00418284	0.00440206	0.00455925	0.00490094	0.00512738	0.00506772	0.00515735	0.00508231	0.00529913	0.00526439	0.00542139	0.00548485	0.005444
1658	0.00421959	0.00358248	0.00374425	0.00366404	0.00390655	0.00380311	0.0038811	0.00399758	0.00406255	0.00415157	0.00447729	0.00451827	0.00480097	0.00520423	0.00500651	0.00510009	0.00506234	0.00520487	0.00525632	0.0052972	0.00536675	0.00548114
1656	0.00426811	0.00365781	0.00383696	0.00370099	0.00398759	0.00381725	0.00385755	0.0039993	0.00418628	0.0042172	0.00472298	0.00462315	0.00485448	0.00534774	0.00501261	0.00516352	0.00517653	0.00525372	0.00536501	0.0053819	0.00547204	0.00582212
1654	0.00430418	0.00373518	0.00389584	0.00374928	0.00402308	0.00383621	0.00386629	0.00403941	0.00441366	0.00435271	0.0050525	0.00482235	0.00502398	0.00544447	0.00503514	0.00531225	0.00529009	0.00540795	0.00550212	0.00557555	0.0057175	0.00629464
1652	0.00430508	0.00377706	0.00386761	0.0037123	0.00398163	0.00384852	0.00389013	0.00411927	0.00454159	0.00448382	0.00525331	0.00495329	0.00513753	0.00537557	0.00497852	0.00542535	0.00526185	0.00554683	0.00554538	0.00570424	0.00591246	0.00653326
1650	0.0043475	0.0038148	0.00387273	0.00367287	0.003977	0.00389356	0.00398458	0.0042743	0.00456204	0.00462872	0.00526852	0.00496084	0.00515877	0.00528954	0.00490571	0.00547857	0.00518462	0.0056312	0.00555489	0.00577401	0.00601709	0.00645302
