# Supplementary material for: Expanding the toolbox for supramolecular chemistry: probing host–guest interactions and binding with in situ FTIR spectroscopy
Source: Royal Society of Chemistry journal article supplement (doi:10.1039/d5sc01329a), 2025-01-01
Supplement: d5sc01329a2.pdf [file d5sc01329a2.pdf]

## **Supporting Information:**

### **Expanding the Toolbox for Supramolecular Chemistry:**

### **Probing Host-Guest Interactions with *in situ* FTIR**

### **Spectroscopy**

*Shiva Moaven,<sup>1</sup> Douglas A. Vander Griend,<sup>2</sup> Darren W. Johnson,<sup>1,\*</sup> Michael D. Pluth<sup>1,\*</sup>*

<sup>1</sup> Department of Chemistry and Biochemistry, Materials Science Institute, 1253 University of Oregon, Eugene, OR 97403, United States

<sup>2</sup> Department of Chemistry and Biochemistry, Calvin University, Grand Rapids, MI 49546, USA

Corresponding authors: [pluth@uoregon.edu](mailto:pluth@uoregon.edu), [dwj@uoregon.edu](mailto:dwj@uoregon.edu)

## Table of Contents

|                                                      |    |
|------------------------------------------------------|----|
| Experimental Details .....                           | 3  |
| S1.1    General Methods.....                         | 3  |
| S1.2    Synthesis .....                              | 4  |
| S1.2.1    Preparation of D-IPr·PF <sub>6</sub> ..... | 4  |
| S1.3    Spectroscopic Data.....                      | 5  |
| S1.3.1 <sup>1</sup> H NMR .....                      | 5  |
| S1.3.2 <i>in-situ</i> FTIR titrations .....          | 8  |
| S1.3.3 <sup>1</sup> H NMR titrations .....           | 35 |
| S1.3.4    UV-vis titrations.....                     | 49 |
| S1.3.5    ATR-FTIR.....                              | 52 |
| S1.4    References.....                              | 53 |

## Experimental Details

### S1.1 General Methods

General reagents and reaction starting materials were used as purchased. Anhydrous acetone (500 mL, ACS grade) was obtained by heating at 50 °C and stirring over K<sub>2</sub>CO<sub>3</sub> (15 g, ACS grade) for 16 hours, distilling under N<sub>2</sub>, and storing over activated 3 Å molecular sieves inside an N<sub>2</sub> glovebox. Anhydrous acetonitrile (MeCN) was obtained by passing the HPLC grade over a bed of activated molecular sieves in a commercial (Pure Process Technology) solvent purification system (SPS). Deuterated solvents were purchased from Cambridge Isotopes Laboratory and degassed using three freeze-pump-thaw cycles before being transferred onto freshly activated 3 Å molecular sieves inside the glovebox. 1,3-*bis*(2,6-Diisopropylphenyl)imidazoliumchloride (H-IPr·Cl), 1,3-*bis*(2,6-diisopropylphenyl)imidazoliumhexafluorophosphate (H-IPr·PF<sub>6</sub>), and 1,1',1''-(nitrilotri(ethane-2,1-diyl))tri(3-(4-trifluoromethyl)phenyl)urea (*p*-CF<sub>3</sub>-tren-trisurea) were prepared according as described previously.<sup>1-3</sup> Air or moisture-sensitive manipulations were performed in a nitrogen-purged inert atmosphere box. All NMR spectra were collected at 25 °C on a Varian Inova 500 MHz NMR spectrometer. All solid-state IR spectra were obtained using a Nicolet 6700 FT-IR spectrometer equipped with an ATR accessory.

## S1.2 Synthesis

### S1.2.1 Preparation of D-IPr·PF<sub>6</sub>

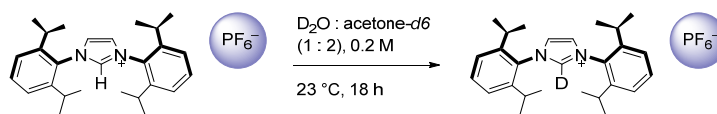

**Scheme S1.** Reaction scheme for deuterium exchange on H-IPr·PF<sub>6</sub>.

The following procedure was adapted from a previous report.<sup>4</sup> In a 25 mL round bottom flask, H-IPr·PF<sub>6</sub> (1.100 g, 2.058 mmol) was dissolved in a 10 mL mixture of 1:2 D<sub>2</sub>O:acetone-*d*<sub>6</sub> and stirred at 23 °C for 12 hours. The reaction mixture was then concentrated to ~4 mL and stored at -20 °C. After 18 hours, the compound had crystallized, and the resultant crystals were collected by filtration and dried in a vacuum oven at 60 °C for 12 hours. The final product was stored inside a N<sub>2</sub>-filled glovebox. Yield 870 mg (79%). <sup>1</sup>H NMR (500 MHz, acetone-*d*<sub>6</sub>, δ): 1.29 (dd, *J* = 26.8, 6.9 Hz, 24H), 2.60 (p, *J* = 6.8 Hz, 4H), 7.56 (d, *J* = 7.56 Hz, 4H), 7.71 (t, *J* = 7.9 Hz, 2H), 8.45 (s, 2H), 9.82 (t, *J* = 1.6 Hz, 0.05H). <sup>2</sup>H NMR (76.8 MHz, acetone-*d*<sub>6</sub>, δ): 9.80 (s, broad). FTIR (ATR, cm<sup>-1</sup>) 3179, 3158 (ν<sub>C-H</sub>, w); 2966, 2930, 2870 (ν<sub>C-H</sub>, m to w); 2358 (ν<sub>C-D</sub>, w); 1518 (ν<sub>C=N</sub>, m); 1610 (ν<sub>C=C</sub>, s), 1454 (δ<sub>C-H</sub>, m).

## S1.3 Spectroscopic Data

### S1.3.1 $^1\text{H}$ NMR

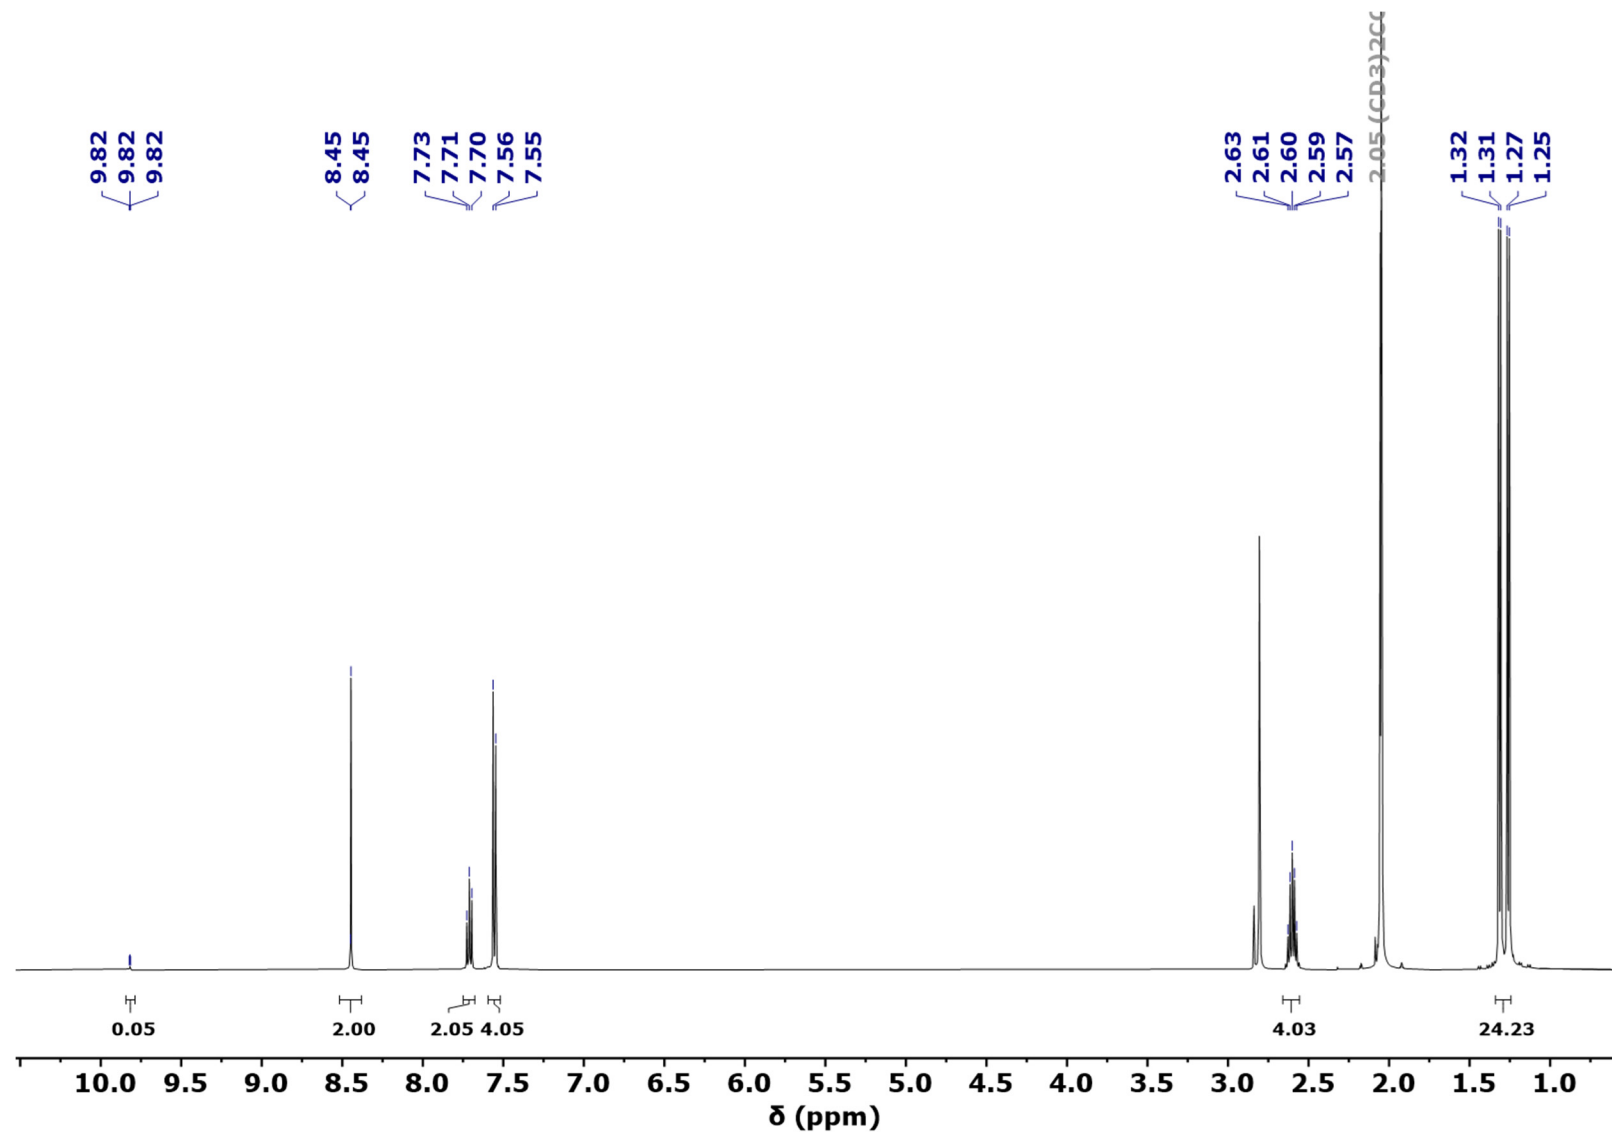

**Figure S1.**  $^1\text{H}$  NMR spectrum (500 MHz, acetone- $d_6$ ) of D-IPr·PF<sub>6</sub> at 298 K.

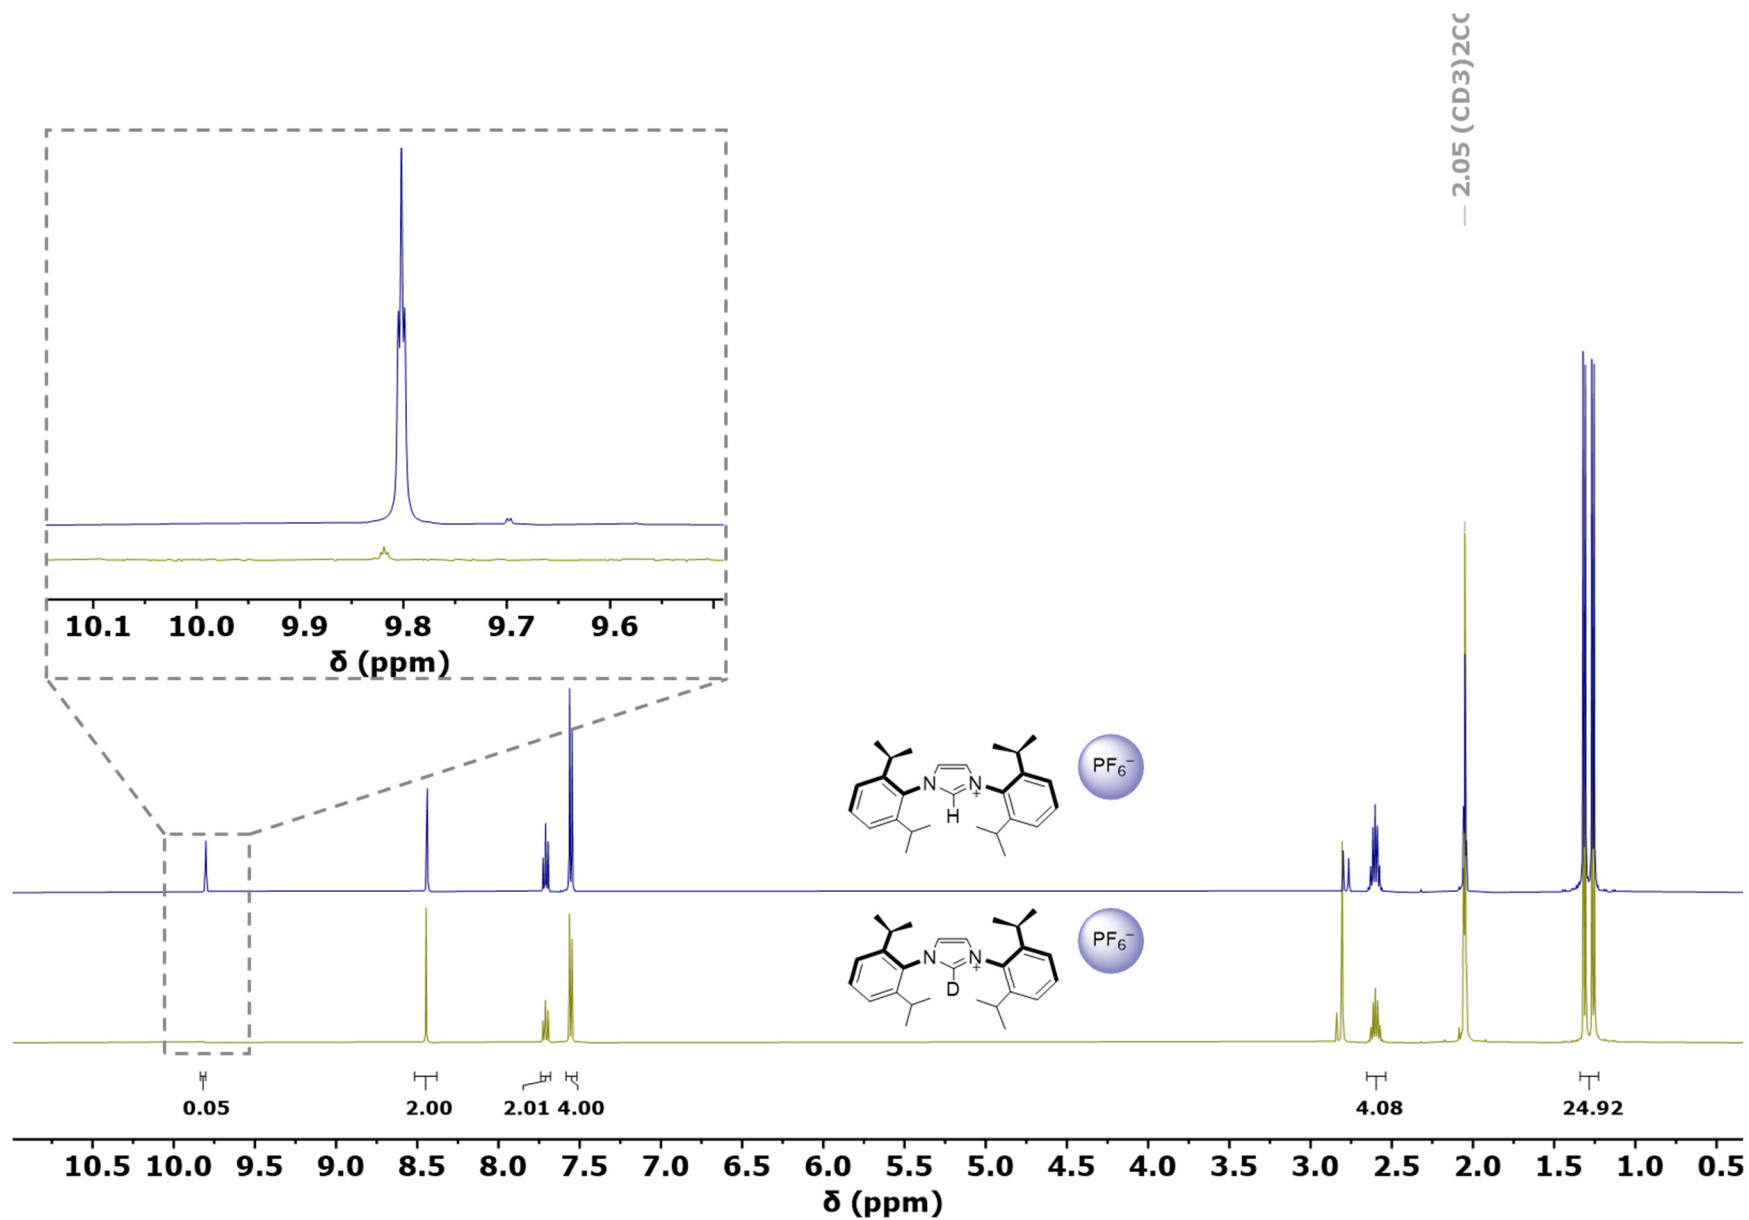

**Figure S2.** Comparison of the  $^1\text{H}$  NMR spectra of  $\text{H-IPr}\cdot\text{PF}_6$  (top trace) and  $\text{D-IPr}\cdot\text{PF}_6$  (bottom trace) in acetone- $d_6$  at 298 K. Expansion is the residual signal of the proton on the C-2 position.

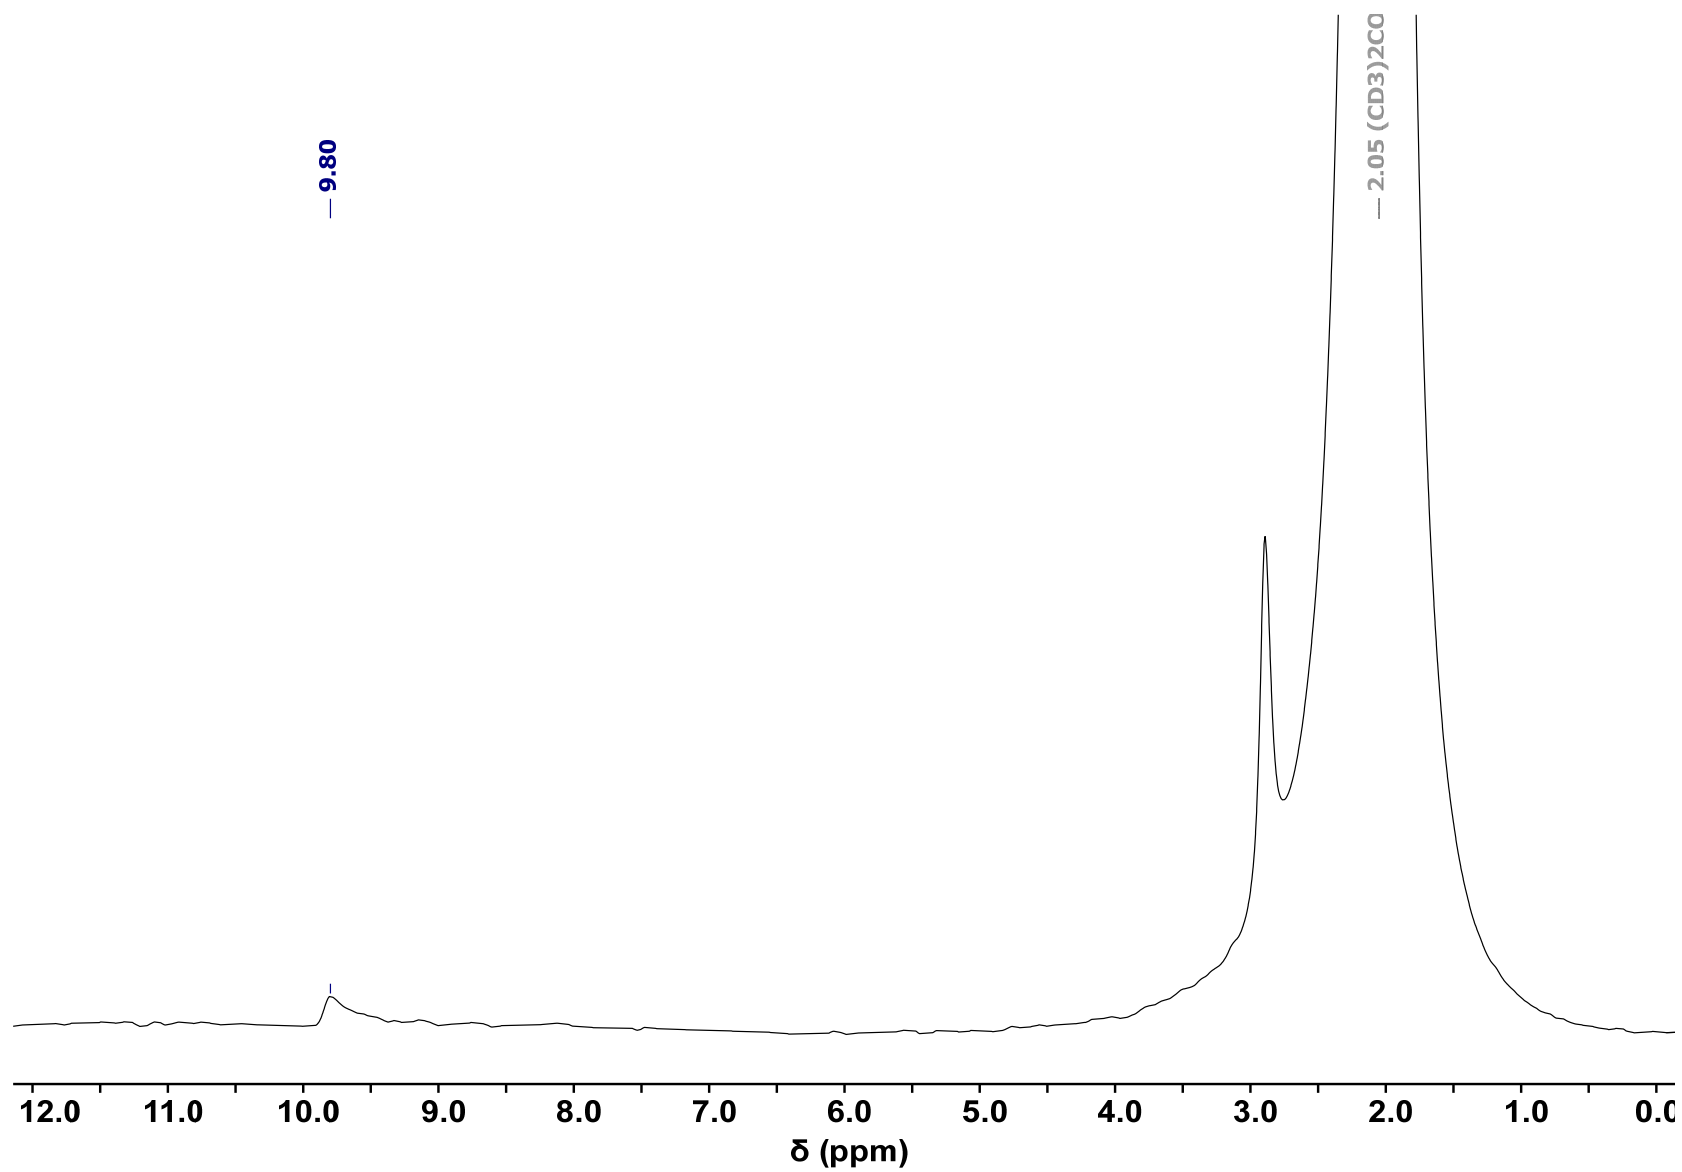

**Figure S3.**  $^2\text{H}$  NMR spectrum (76.8 MHz, acetone- $d_6$ ) of D-IPr·PF<sub>6</sub> at 298 K.

### S1.3.2 *in situ* FTIR titrations

The *in situ* FTIR titration data were collected at 25 °C or 23 °C on a Mettler Toledo model 702 ReactIR instrument. All *in situ* FTIR measurements were performed with the ReactIR probe inside an N<sub>2</sub>-purged Schlenk tube equipped with a septum, gas inlet, and adapter for the ReactIR probe (see Figure S4). The temperature was maintained using a temperature-controlled aluminum block padded with glass wool. All solution transfers and guest additions were performed with gas-tight syringes. All samples were prepared inside a nitrogen-filled glovebox. Before each titration experiment, a background spectrum of the degassed solvent or solution mixture was collected. Stock solutions of the D/H-IPr·PF<sub>6</sub> and *p*-CF<sub>3</sub>-tren-trisurea receptors were prepared in anhydrous acetone and 20% DMSO in MeCN, respectively. Experiments with the halogen bond donor (NBS) were performed under ambient conditions using ACS grade MeCN and protected from light with aluminum foil. For each *in situ* FTIR trial 3.0 mL of the host solution was transferred into the septa sealed Schlenk flask. To maintain a constant host concentration during the titration process, each guest titrant (TBACl, TBABr, TBAI, TBAHSO<sub>4</sub>, TBANO<sub>3</sub>, TBAOCN) was added to 1 mL of the host solution at the desired concentration.<sup>5</sup> After each guest addition, the resultant host-guest solution was allowed to stir for at least one minute for equilibration and then FTIR spectrum would be collected.

***Safety Caution!*** *N*-Bromosuccinimide (NBS) is a corrosive and oxidizing compound and should be handled with care. All solutions containing NBS were quenched with an excess of sodium thiosulfate in water prior to disposal.

Binding affinities from the FTIR data were measured using parametric equilibrium-restricted global analysis (PERGA) using the SIVVU program.<sup>6</sup> Different models were tested to confirm the best fit to the data. Data fitting was performed without modeling activity estimations. Titrations

were performed in triplicate, where the final values reported in each table are the average of  $K_a$  and the histogram of combined 95% confidence intervals for the three titrations.<sup>7</sup> Activities could potentially be modeled as something other than unity according to various constructs (Scatchard, Debye-Hückel, etc.), but doing so only results in a small, concerted shift in the  $\log K$  values that does not improve the fit to the data. The logarithm of activity coefficients are rendered as additive constants in the expression of  $\log K$  values. Therefore, the newer versions of SIVVU do not include activity coefficients, because including such activity coefficients would just shift the  $K_a$  values, but not lead to convergence across different methods.

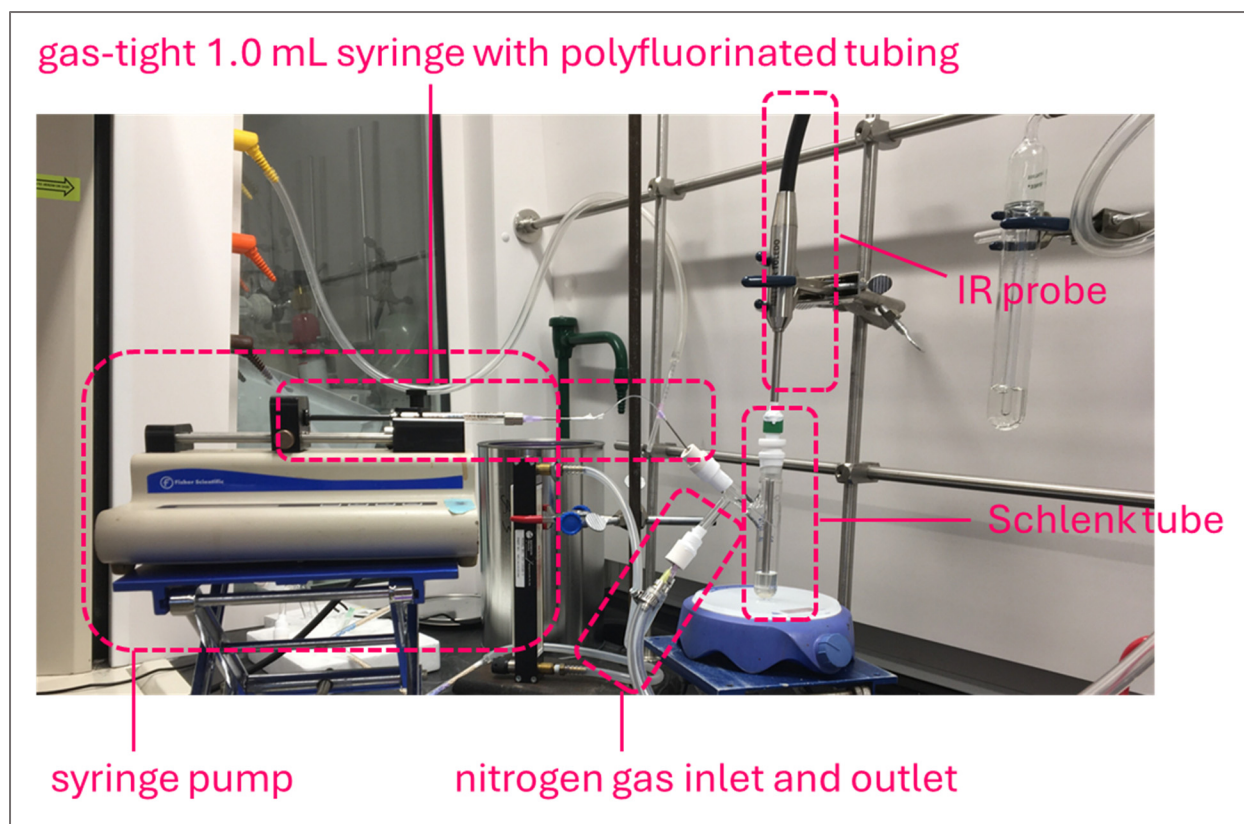

**Figure S4.** The general setup for the *in situ* FTIR experiments. S1.3.2.1 Details and results of *in situ* FTIR titration for D-IPr·PF<sub>6</sub> and TBACl

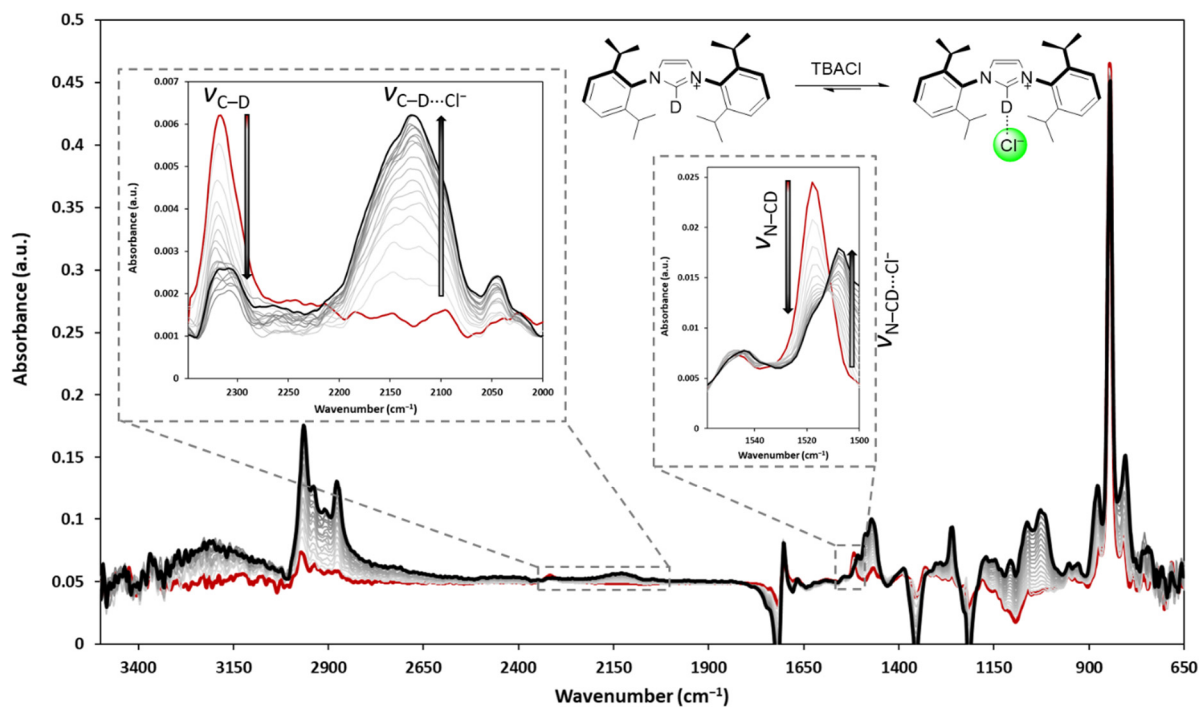

**Figure S5.** Full *in situ* FTIR titration spectra of D-IPr·PF<sub>6</sub> (48.3 mM) and TBACl in dry acetone at 296 K.

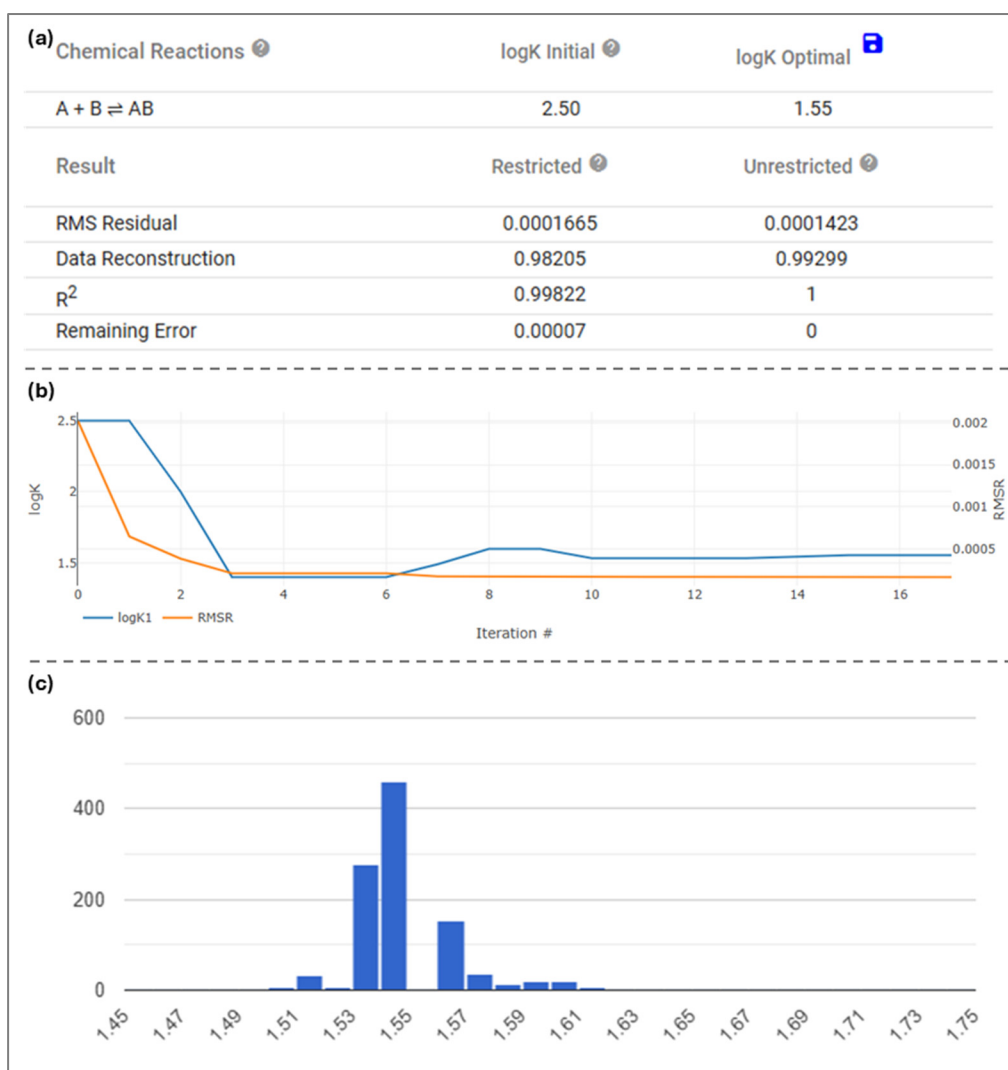

**Figure S6.** Representative (a) summary table, (b) fitted data, and (c) histogram (1000 bootstraps) for uncertainty analysis for D-IPr-PF<sub>6</sub> (C–N region) and TBACl in dry acetone solution.

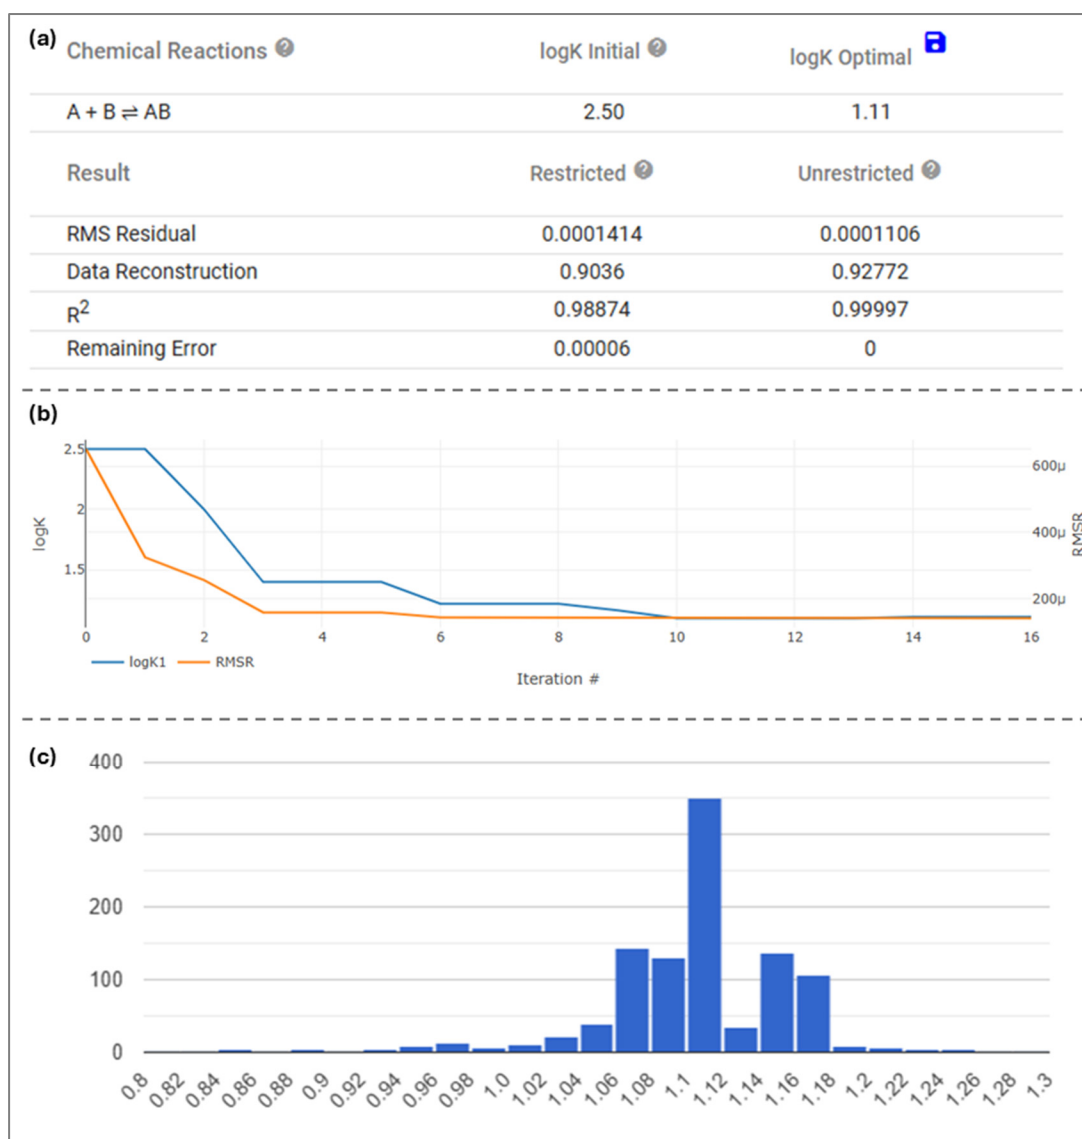

**Figure S7.** Representative (a) summary table, (b) fitted data, and (c) histogram (1000 bootstraps) for uncertainty analysis for D-IPr-PF<sub>6</sub> (C–D region) (48.3 mM) and TBACl in dry acetone solution.

**Table S1.** Summary of *in situ* FTIR titration data for D-IPr-PF<sub>6</sub> (48.3 mM) and TBACl in dry acetone solution.

| Region | log $K_{1:1}$ | 95% confidence interval |
|--------|---------------|-------------------------|
| C–D    | 1.11          | [0.98, 1.17]            |
| C–N    | 1.55          | [1.51, 1.60]            |

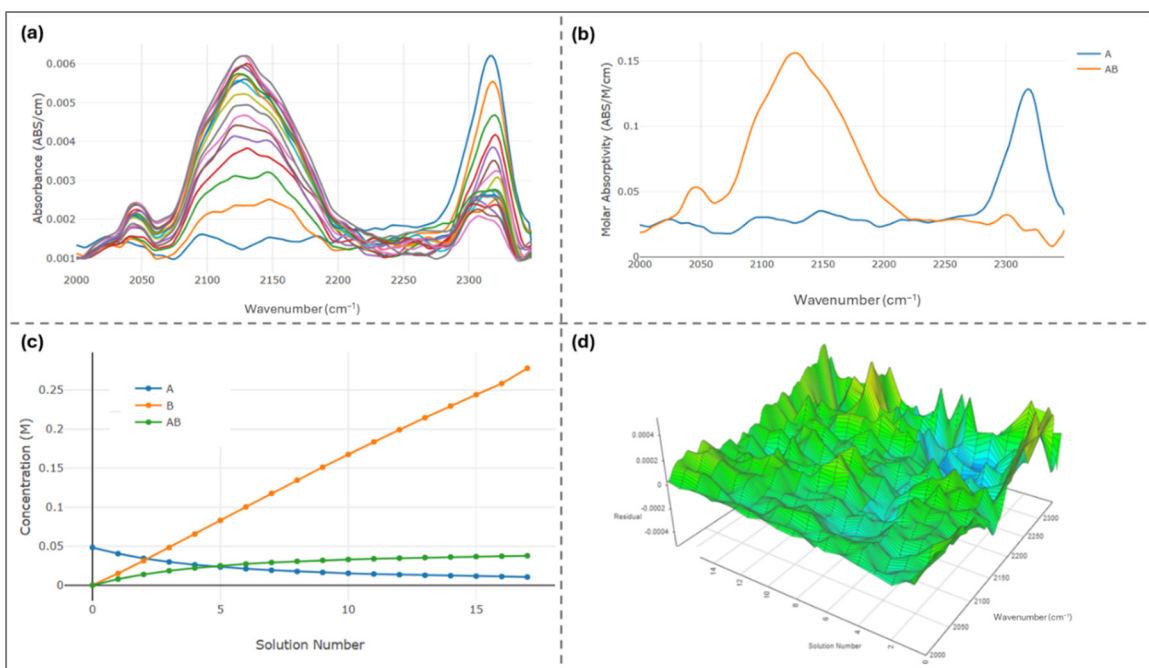

**Figure S8.** (a) *in situ* FTIR titration spectra of D-IPr-PF<sub>6</sub> (48.3 mM) and TBACl in dry acetone at 298 K. (b) Molar absorptivity plots of the host (blue) and 1:1 host-guest complex (yellow). (c) Concentration data of different host (A, blue), guest (B, yellow), and host-guest complex (AB, green) (d) Residuals obtained from data fitting.

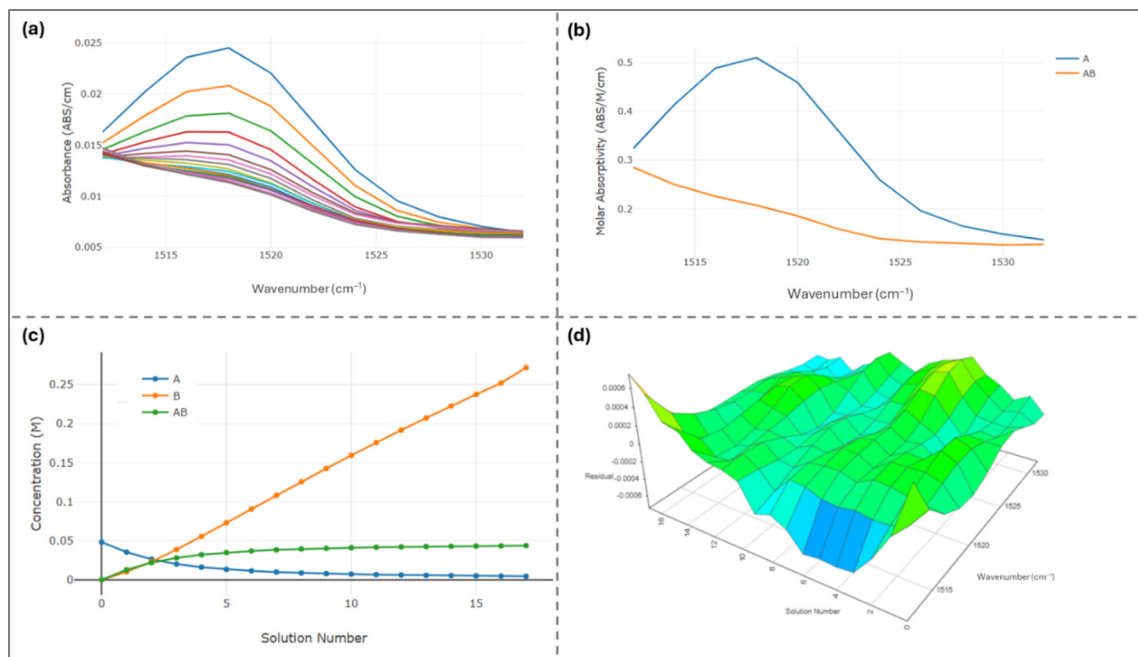

**Figure S9.** (a) *in situ* FTIR titration spectra of D-IPr-PF<sub>6</sub> (48.3 mM) and TBACl in dry acetone at 298 K. (b) Molar absorptivity plots of the host (blue) and 1:1 host-guest complex (yellow). (c) Concentration data of different host (A, blue), guest (B, yellow), and host-guest complex (AB, green) (d) Residuals obtained from data fitting.

### S1.3.2.2 Details and results of *in situ* FTIR titration for H-IPr-PF<sub>6</sub> and TBACl

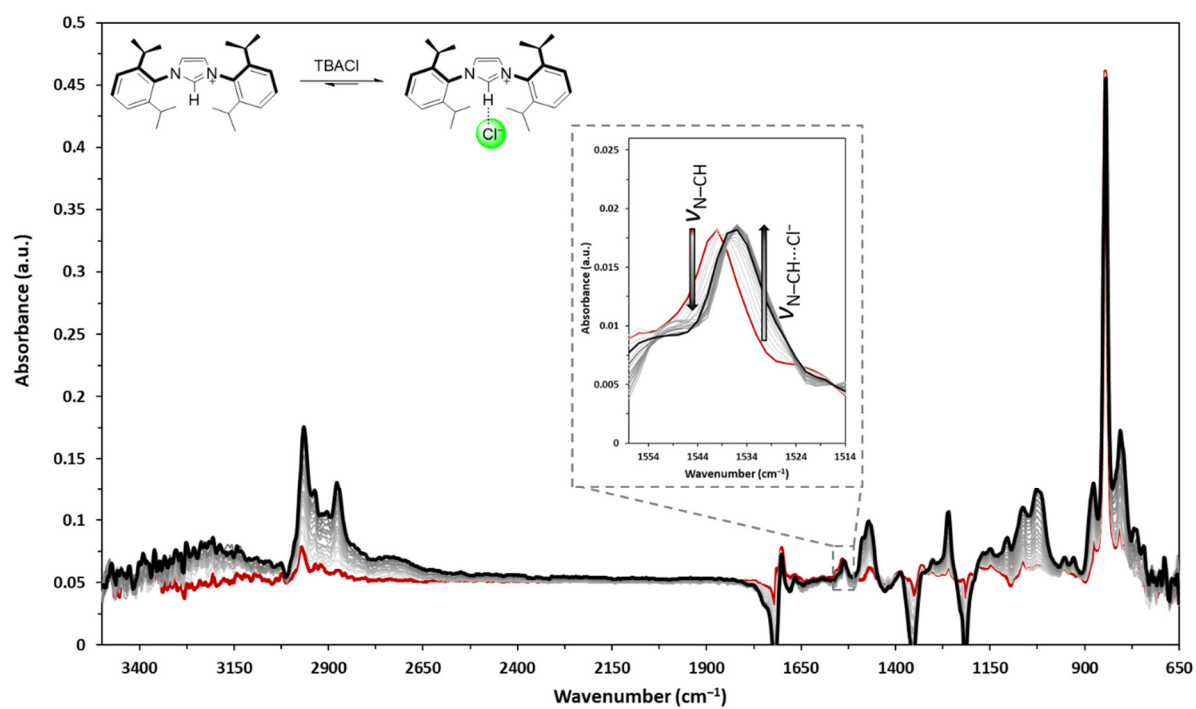

**Figure S10.** Full *in situ* FTIR titration spectra of H-IPr-PF<sub>6</sub> (48.4 mM) and TBACl in dry acetone at 296 K.

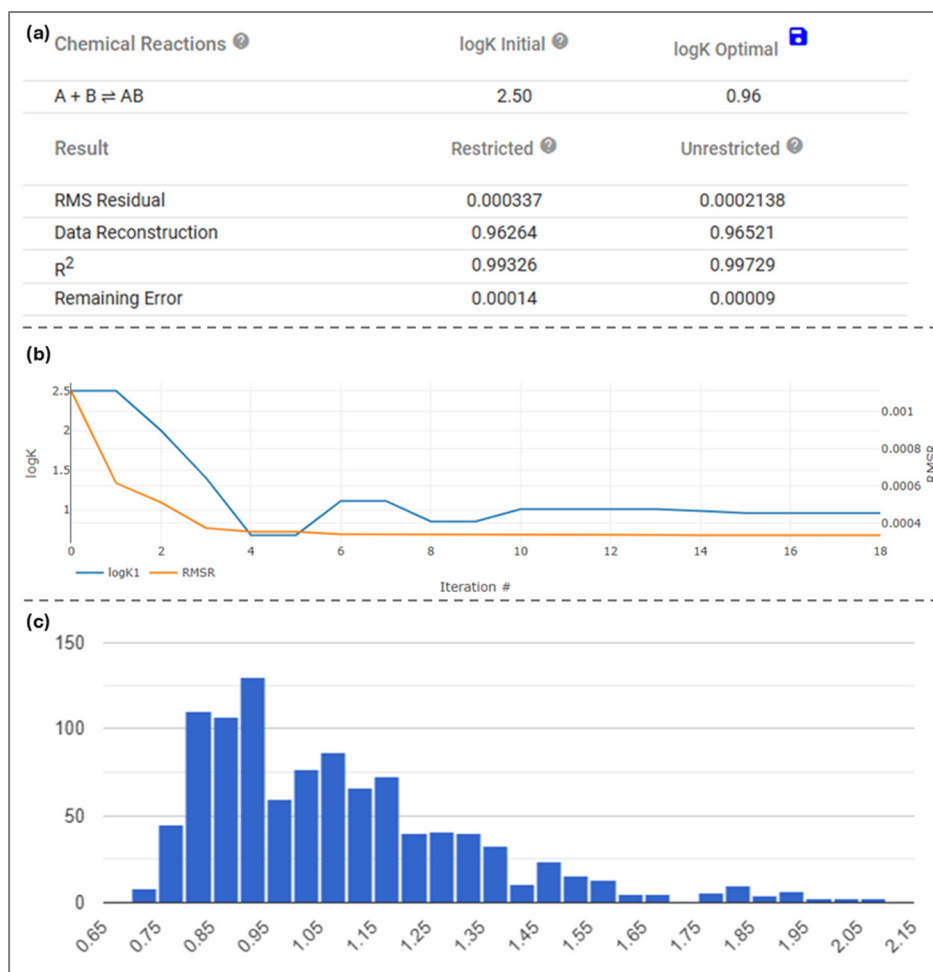

**Figure S11.** Representative (a) summary table, (b) fitted data, and (c) histogram (1000 bootstraps) for uncertainty analysis for H-IPr-PF<sub>6</sub> (48.4 mM) and TBACl in dry acetone solution.

**Table S2.** Summary of *in situ* FTIR titration data for H-IPr-PF<sub>6</sub> (48.4 mM) and TBACl in dry acetone solution.

| Region | log $K_{1:1}$ | 95% confidence interval |
|--------|---------------|-------------------------|
| C–N    | 0.96          | [0.77, 1.76]            |

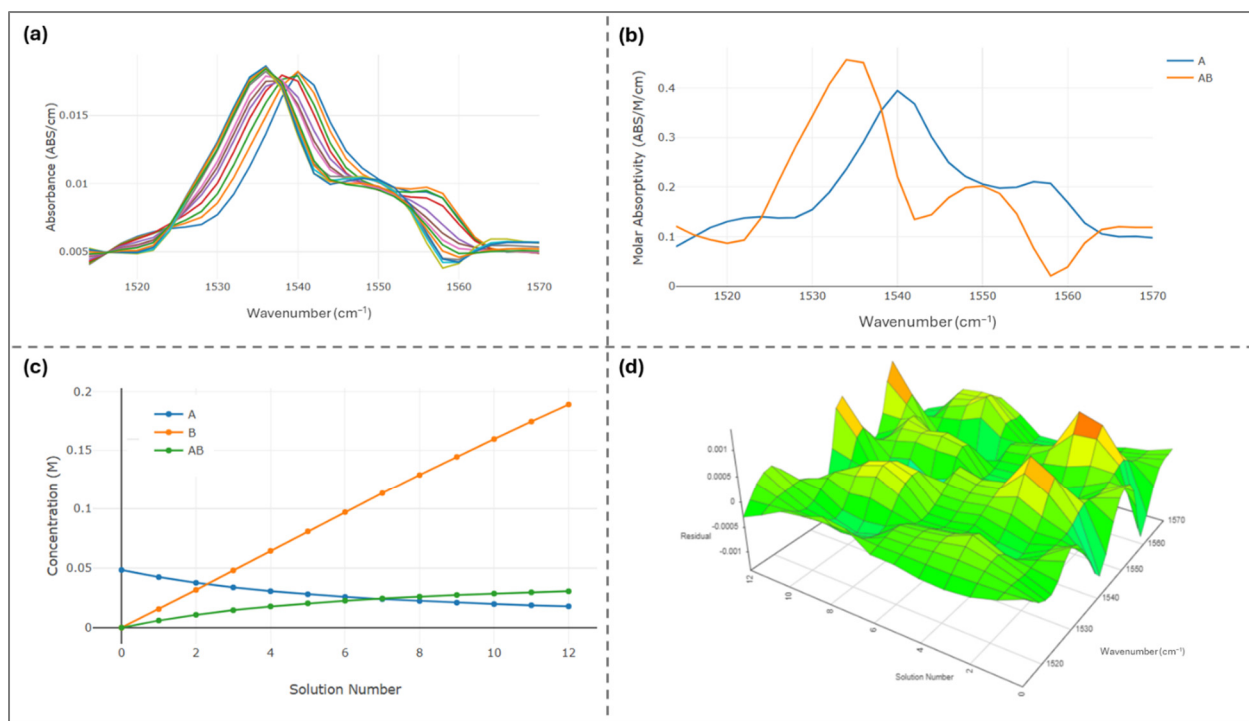

**Figure S12.** (a) *in situ* FTIR titration spectra of H-IPr-PF<sub>6</sub> (48.4 mM) and TBACl in dry acetone at 298 K. (b) Molar absorptivity plots of the host (blue) and 1:1 host-guest complex (yellow). (c) Concentration data of different host (A, blue), guest (B, yellow), and host-guest complex (AB, green) (d) Residuals obtained from data fitting.

### S1.3.2.3 Gaussian deconvolution of the carbonyl region of the *p*-CF<sub>3</sub>-tren(*tris*)urea compound

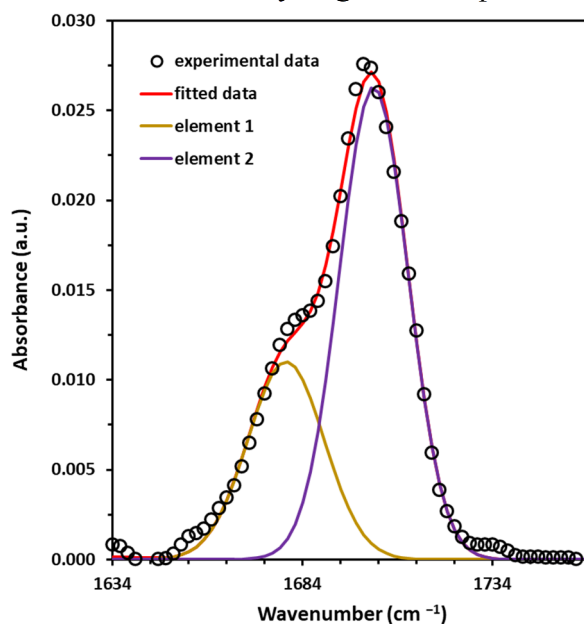

**Figure S13.** Example of Gaussian deconvolution of the carbonyl region of the *p*-CF<sub>3</sub>-tren(*tris*)urea compound. The ratio for the area under the peak of element 1 and element 2 is 46 to 100. Data fitting was performed with the Microsoft Excel package, using the GRG Nonlinear Solving method for 5 elements where the solver found two elements fitting for this solution.

### S1.3.2.4 Details and results of *in situ* FTIR titration for *p*-CF<sub>3</sub>-tren-*tris*urea and TBANO<sub>3</sub>

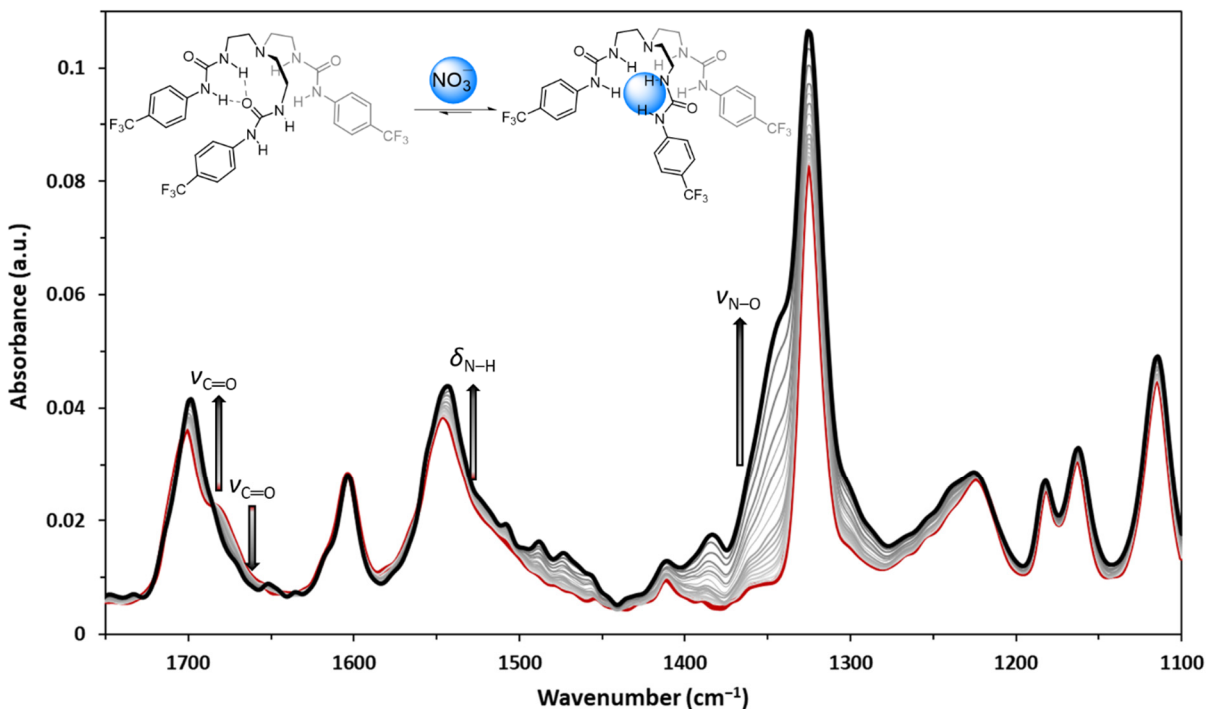

**Figure S14.** Full *in situ* FTIR titration spectra of *p*-CF<sub>3</sub>-tren-*tris*urea (12.7 mM) and TBANO<sub>3</sub> in dry 20% DMSO in MeCN solution mixture at 298 K.

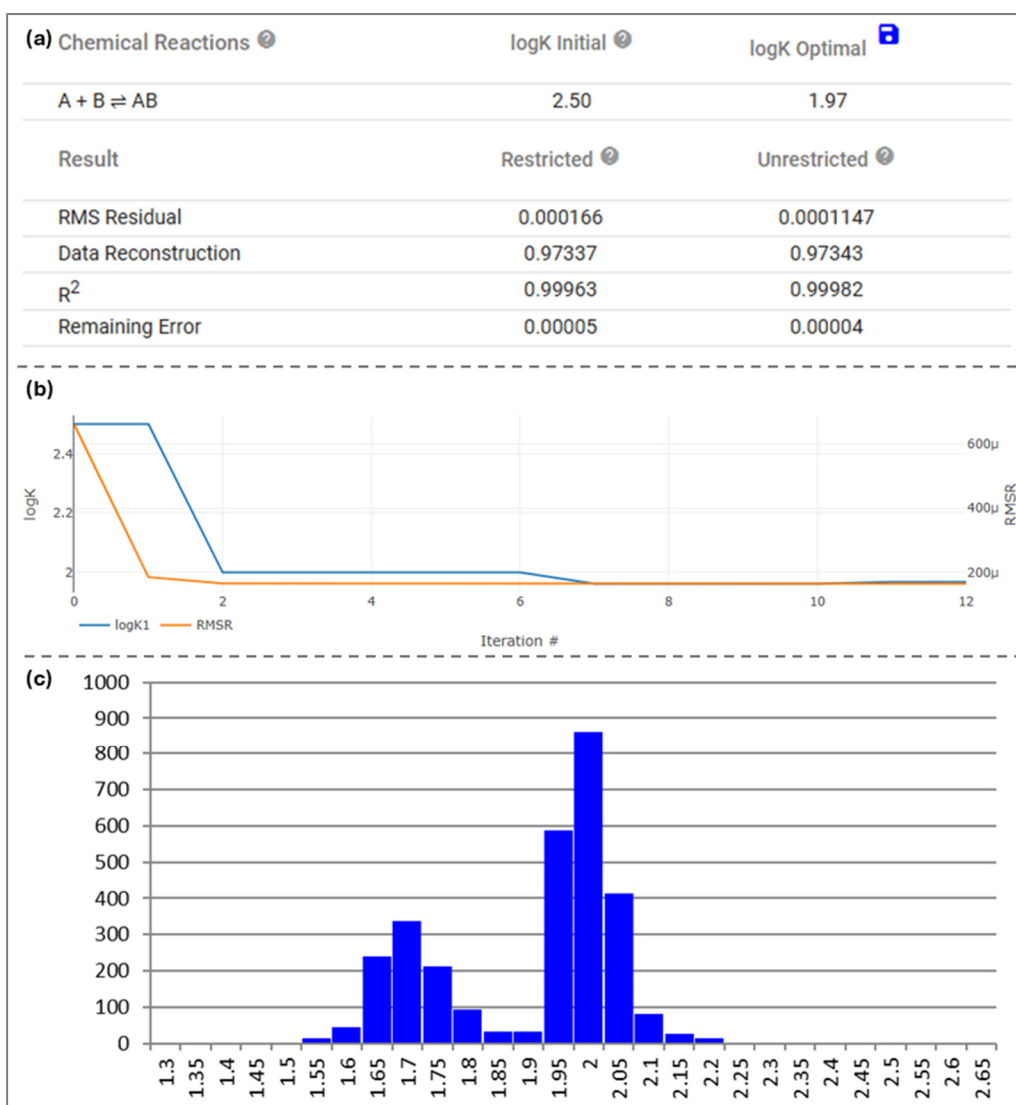

**Figure S15.** Representative (a) summary table, (b) fitted data, and (c) combined histograms (1000 bootstraps for each trial) for uncertainty analysis for *p*-CF<sub>3</sub>-tren-*tris*urea (12.7 mM) and TBANO<sub>3</sub> in dry 20% DMSO in MeCN solution.

**Table S3.** Summary of *in situ* FTIR titration data for *p*-CF<sub>3</sub>-tren-*tris*urea (12.7 mM) and TBANO<sub>3</sub> in dry 20% DMSO in MeCN solution.

| Trial   | log <i>K</i> <sub>1:1</sub> | 95% confidence interval |
|---------|-----------------------------|-------------------------|
| 1       | 1.97                        | [1.91, 2.12]            |
| 2       | 1.96                        | [1.91, 2.05]            |
| 3       | 1.67                        | [1.57, 1.85]            |
| Average | 1.87                        | [1.61, 2.08]            |

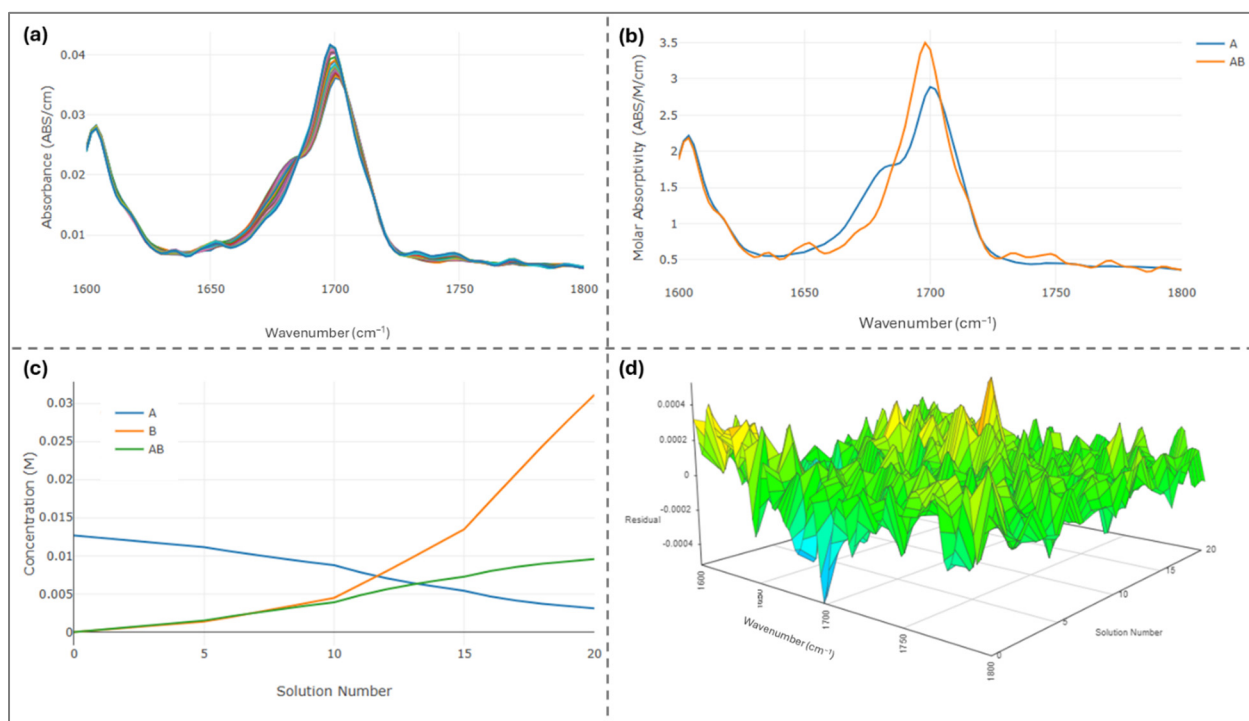

**Figure S16.** (a) *in situ* FTIR titration spectra of *p*-CF<sub>3</sub>-tren-trisurea (12.7 mM) and TBANO<sub>3</sub> in dry 20% DMSO in MeCN solution mixture at 298 K. (b) Molar absorptivity plots of the host (blue) and 1:1 host-guest complex (yellow). (c) Concentration data of different host (A, blue), guest (B, yellow), and host-guest complex (AB, green) (d) Residuals obtained from data fitting.

### S1.3.2.5 Details and results of *in situ* FTIR titration for *p*-CF<sub>3</sub>-tren-*tris*urea and TBAHSO<sub>4</sub>

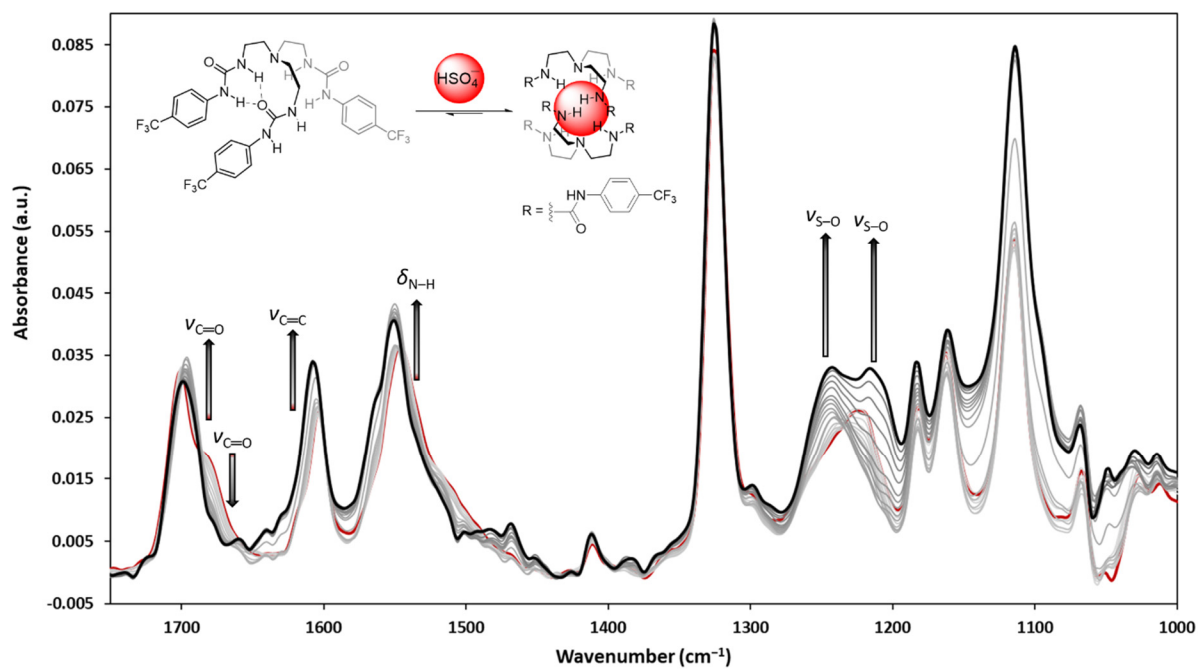

**Figure S17.** Full *in situ* FTIR titration spectra of *p*-CF<sub>3</sub>-tren-*tris*urea (12.5 mM) and TBAHSO<sub>4</sub> in dry 20% DMSO in MeCN solution mixture at 298 K.

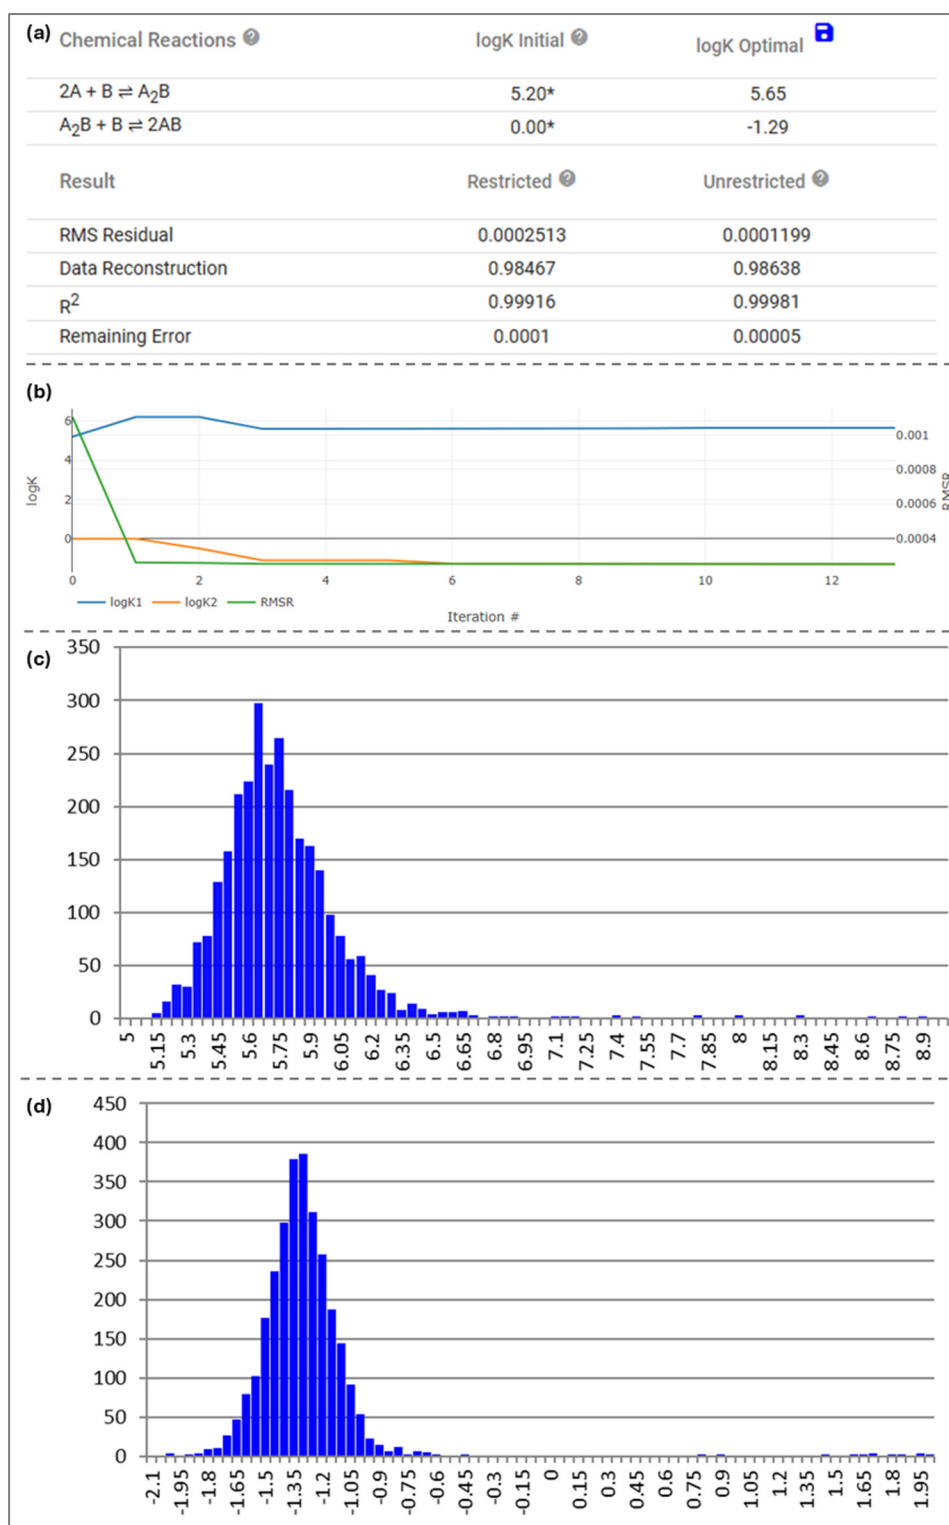

**Figure S18.** Representative (a) summary table, (b) fitted data, and (c,d) combined histograms (1000 bootstraps for each trial) for uncertainty analysis for  $K_{2:1}$  and  $K_{1:1}$  (c and d) for *p*-CF<sub>3</sub>-tren-*tris*urea (12.5 mM) and TBAHSO<sub>4</sub> in dry 20% DMSO in MeCN solution.

**Table S4.** Summary of *in situ* FTIR titration data for *p*-CF<sub>3</sub>-tren-*tris*urea (12.5 mM) and TBAHSO<sub>4</sub> in dry 20% DMSO in MeCN solution.

| Trial   | $\log K_{2:1}$ | 95% confidence interval | $\log K_{1:1}$ | 95% confidence interval |
|---------|----------------|-------------------------|----------------|-------------------------|
| 1       | 5.77           | [5.40, 9.31]            | −1.40          | [−1.72, 2.56]           |
| 2       | 5.78           | [5.30, 6.85]            | −1.67          | [−1.67, 1.78]           |
| 3       | 5.65           | [5.24, 8.05]            | −1.59          | [−1.58, 1.95]           |
| Average | 5.73           | [5.30, 7.89]            | −1.55          | [−1.67, 2.04]           |

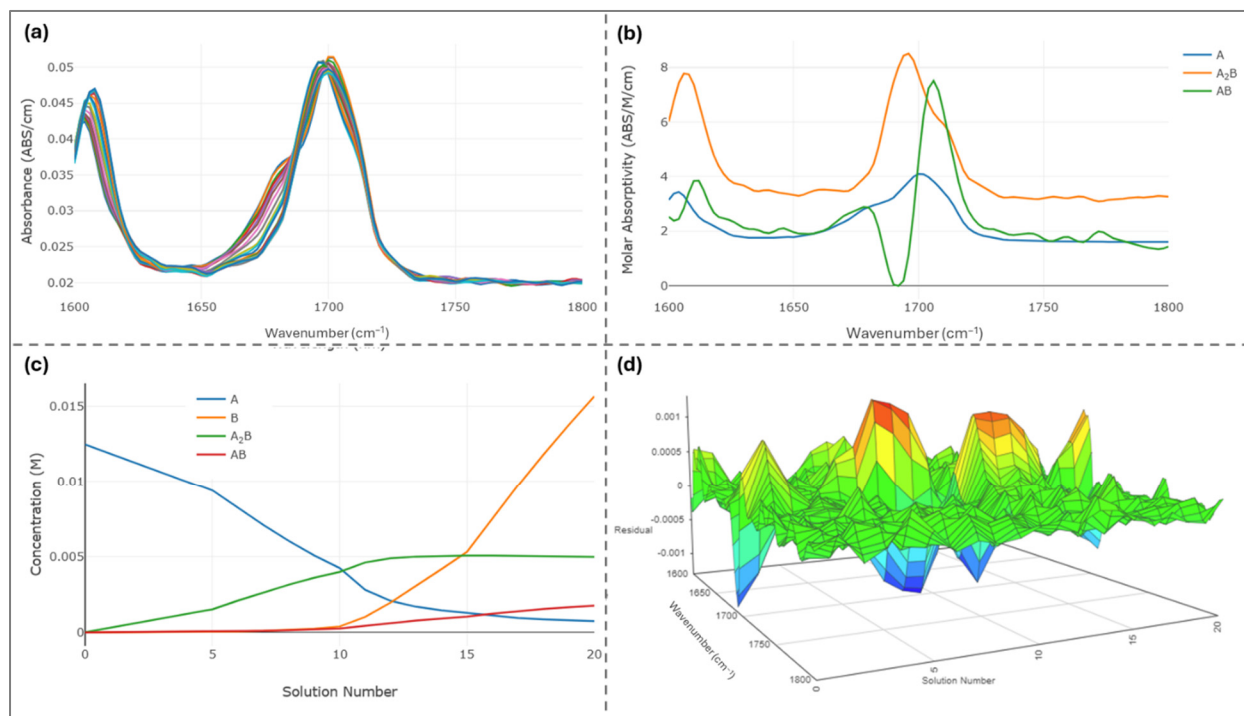

**Figure S19.** (a) *in situ* FTIR titration spectra of *p*-CF<sub>3</sub>-tren (*tris*)urea (12.5 mM) and TBAHSO<sub>4</sub> in dry 20% DMSO in MeCN solution mixture at 298 K. (b) Molar absorptivity plots of the host (blue), 2:1 host-guest complex (yellow), and 1:1 host-guest complex (green). (c) Concentration data of different host (A, blue), guest (B, yellow), 2:1 host-guest complex (A<sub>2</sub>B, green), and 1:1 host-guest complex (AB, red) (d) Residuals obtained from data fitting.

### S1.3.2.6 Details and results of *in situ* FTIR titration for *p*-CF<sub>3</sub>-tren-*tris*urea and TBAOCN

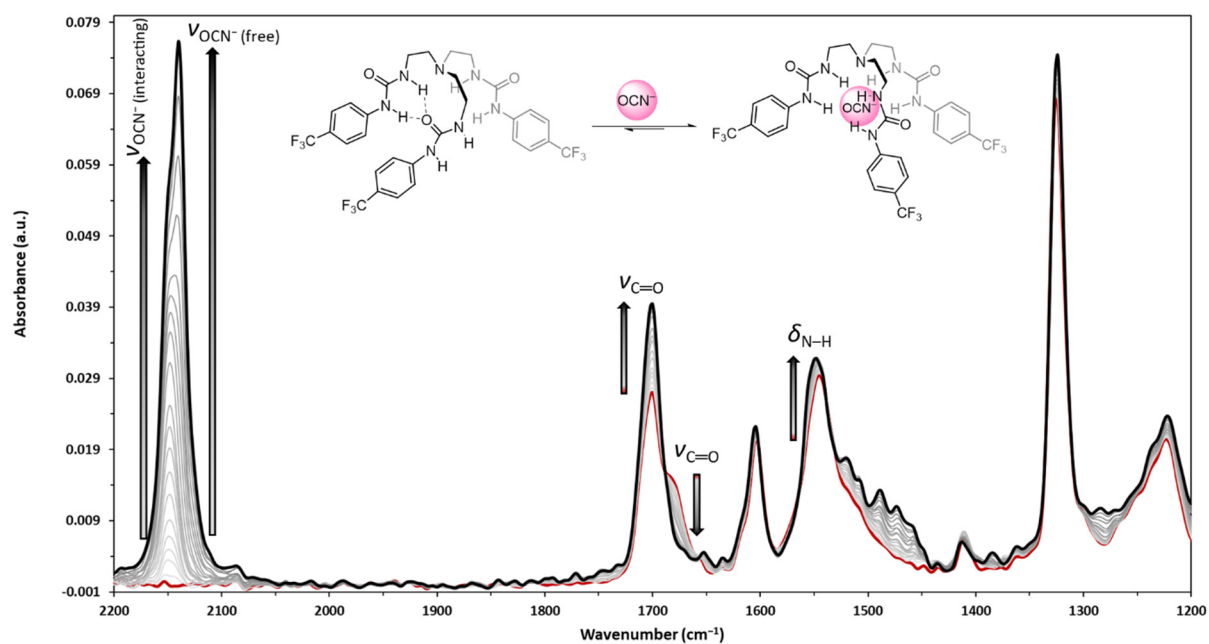

**Figure S20.** Full *in situ* FTIR titration spectra of *p*-CF<sub>3</sub>-tren-*tris*urea (11.6 mM) and TBAOCN in dry 20% DMSO in MeCN solution mixture at 298 K.

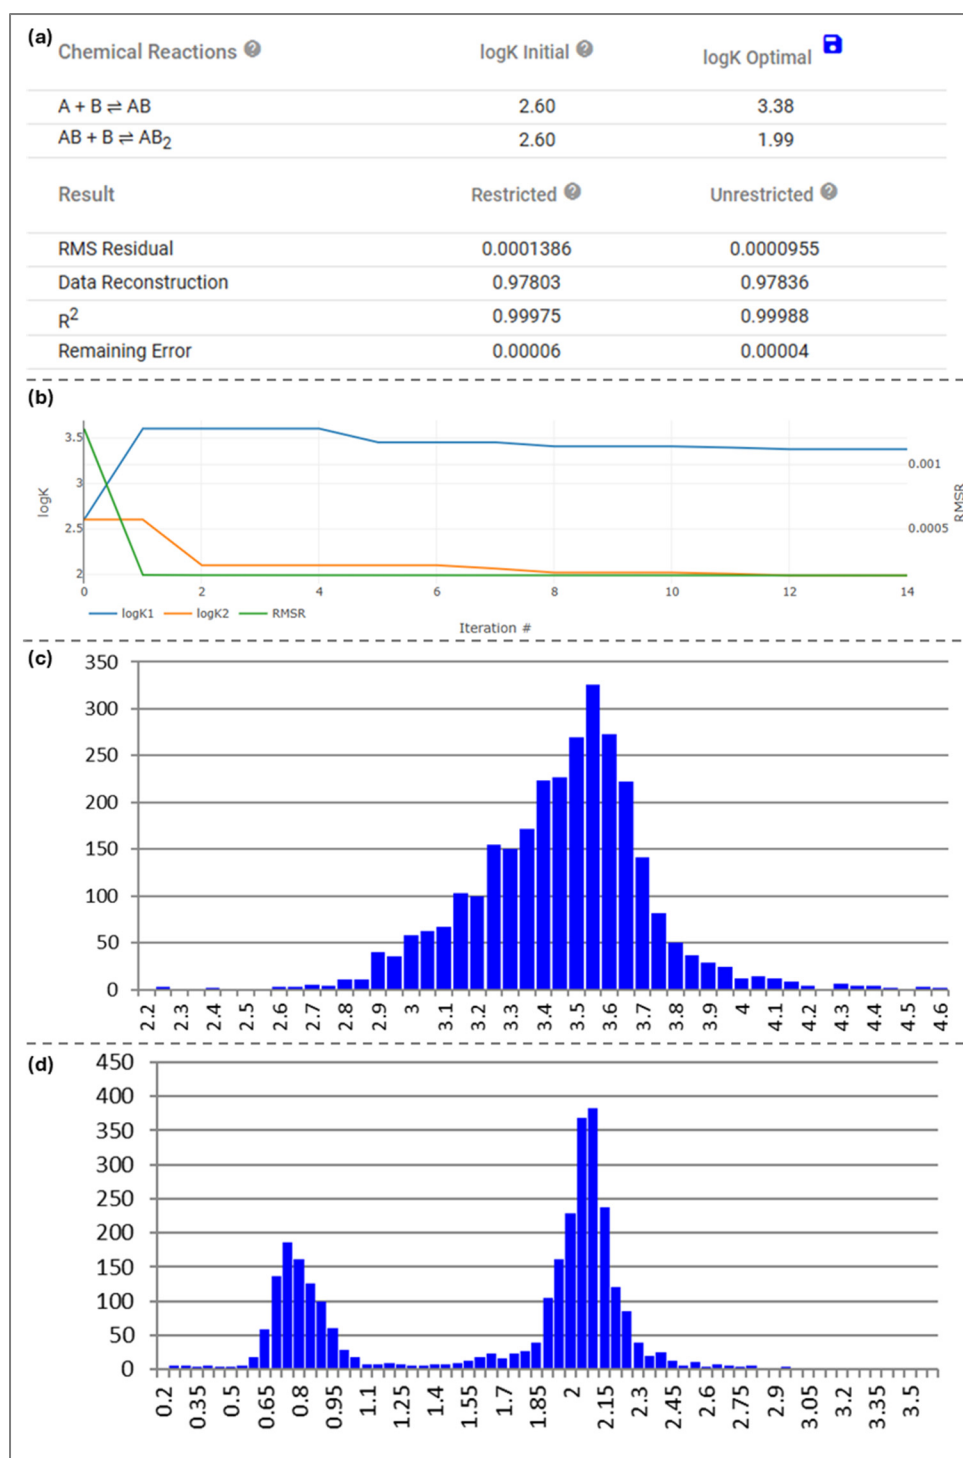

**Figure S21.** Representative (a) summary table, (b) fitted data, and (c,d) combined histograms (1000 bootstraps for each trial) for uncertainty analysis for  $K_{1:1}$  and  $K_{1:2}$  (c and d) for *p*-CF<sub>3</sub>-tren-*tris*urea (11.6 mM) and TBAOCN in dry 20% DMSO in MeCN solution.

**Table S5.** Summary of *in situ* FTIR titration data for *p*-CF<sub>3</sub>-tren (*tris*)urea (11.6 mM) and TBAOCN in dry 20% DMSO in MeCN solution.

| Trial   | $\log K_{1:1}$ | 95% confidence interval | $\log K_{1:2}$ | 95% confidence interval |
|---------|----------------|-------------------------|----------------|-------------------------|
| 1       | 3.59           | [3.32, 3.92]            | 0.69           | [0.59, 1.79]            |
| 2       | 3.33           | [2.94, 3.95]            | 2.02           | [1.98, 2.55]            |
| 3       | 3.38           | [2.80, 4.33]            | 1.99           | [0.67, 2.28]            |
| Average | 3.43           | [2.90, 4.13]            | 1.57           | [0.63, 2.41]            |

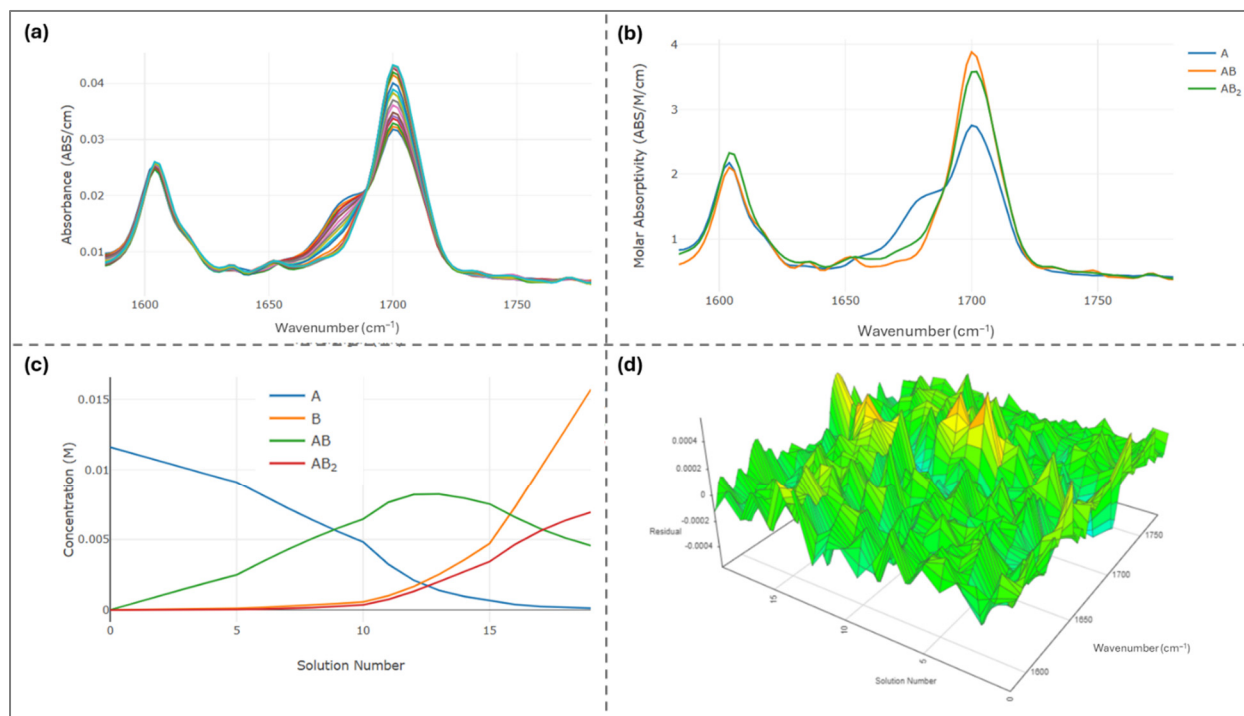

**Figure S22.** (a) *in situ* FTIR titration spectra of *p*-CF<sub>3</sub>-tren-*tris*urea (11.6 mM) and TBAOCN in dry 20% DMSO in MeCN solution at 298 K. (b) Molar absorptivity plots of the host (blue), 1:1 host-guest complex (yellow), and 1:2 host-guest complex (green). (c) Concentration data of different host (A, blue), guest (B, yellow), 1:1 host-guest complex (AB, green), and 1:2 host-guest complex (AB<sub>2</sub>, red) (d) Residuals obtained from data fitting.

### S1.3.2.7 Details and results of *in situ* FTIR titration for TBAOCN and *p*-CF<sub>3</sub>-tren-*tris*urea

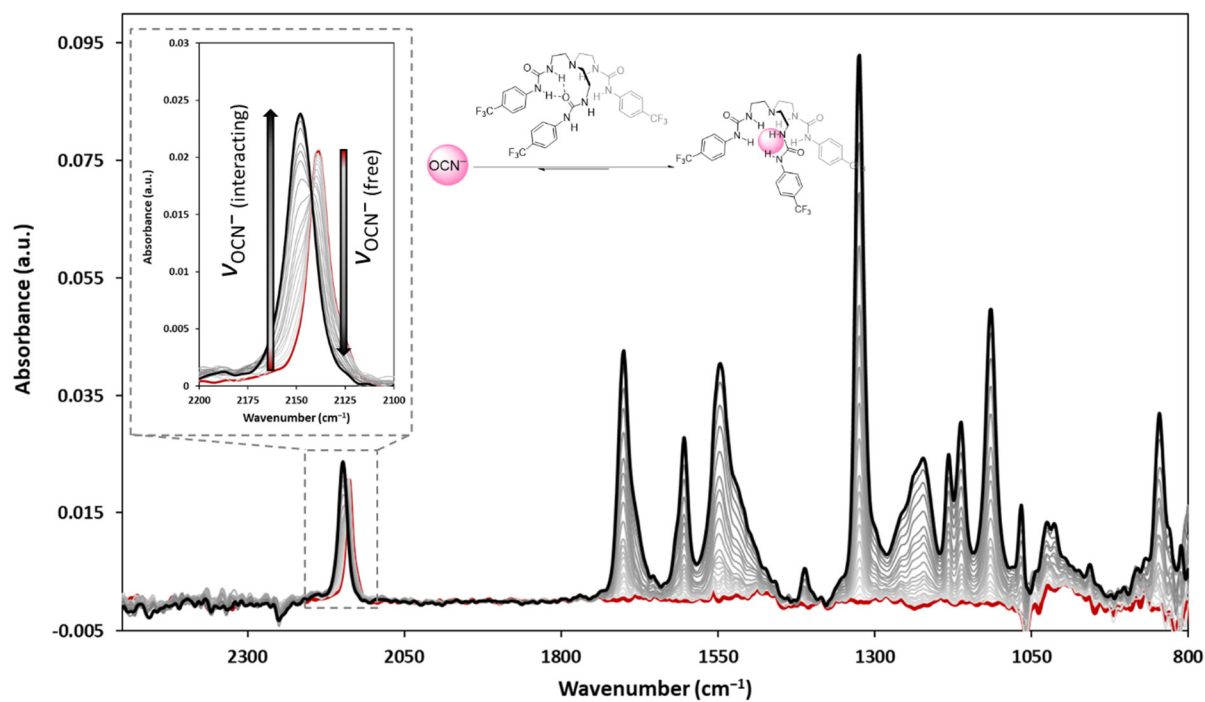

**Figure S23.** Full *in situ* FTIR titration spectra of TBAOCN (6.67 mM) and *p*-CF<sub>3</sub>-tren-*tris*urea in dry 20% DMSO in MeCN solution mixture at 298 K.

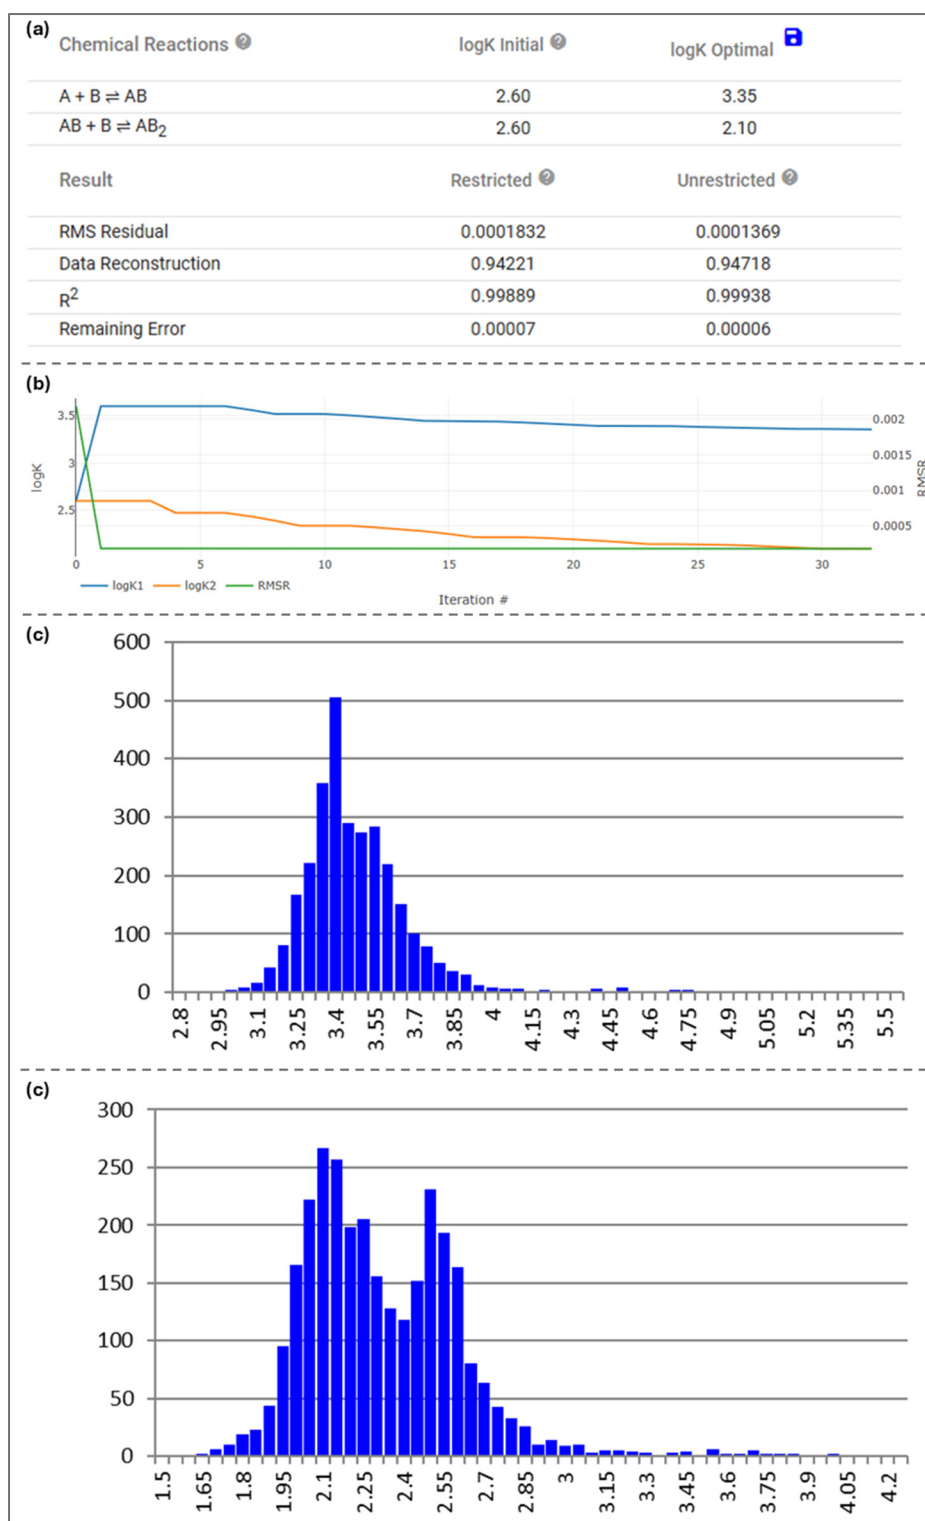

**Figure S24.** Representative (a) summary table, (b) fitted data, and (c) combined histograms (1000 bootstraps for each trial) uncertainty analysis for  $K_{1:1}$  and  $K_{1:2}$  (c and d) for TBAOCN and *p*-CF<sub>3</sub>-tren-*tris*urea (6.67 mM) in dry 20% DMSO in MeCN solution.

**Table S6.** Summary of *in situ* FTIR titration data for TBAOCN and *p*-CF<sub>3</sub>-tren-*tris*urea (6.67 mM) in dry 20% DMSO in MeCN solution.

| Trial   | log $K_{1:1}$ | 95% confidence interval | log $K_{1:2}$ | 95% confidence interval |
|---------|---------------|-------------------------|---------------|-------------------------|
| 1       | 3.36          | [3.11, 3.95]            | 2.10          | [1.85, 2.83]            |
| 2       | 3.51          | [3.16, 3.87]            | 2.04          | [1.83, 2.55]            |
| 3       | 3.37          | [3.22, 4.03]            | 2.51          | [2.37, 3.17]            |
| Average | 3.41          | [3.16, 3.94]            | 2.22          | [1.87, 2.95]            |

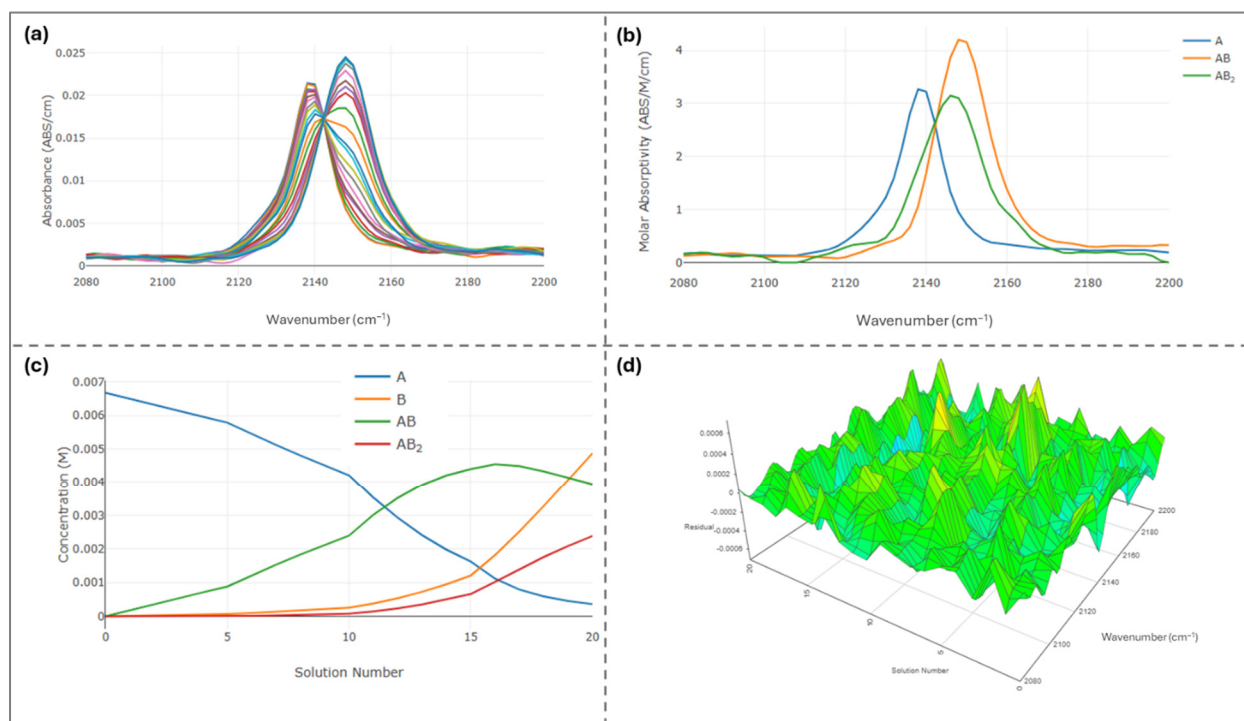

**Figure S25.** (a) *in situ* FTIR titration spectra of TBAOCN (6.67 mM) and *p*-CF<sub>3</sub>-tren-*tris*urea in dry 20% DMSO in MeCN solution at 298 K. (b) Molar absorptivity plots of the host (blue), 1:1 host-guest complex (yellow), and 1:2 host-guest complex (green). (c) Concentration data of different host (A, blue), guest (B, yellow), 1:1 host-guest complex (AB, green), and 1:2 host-guest complex (AB<sub>2</sub>, red) (d) Residuals obtained from data fitting.

### S1.3.2.8 Details and results of *in situ* FTIR titration for NBS and TBACl

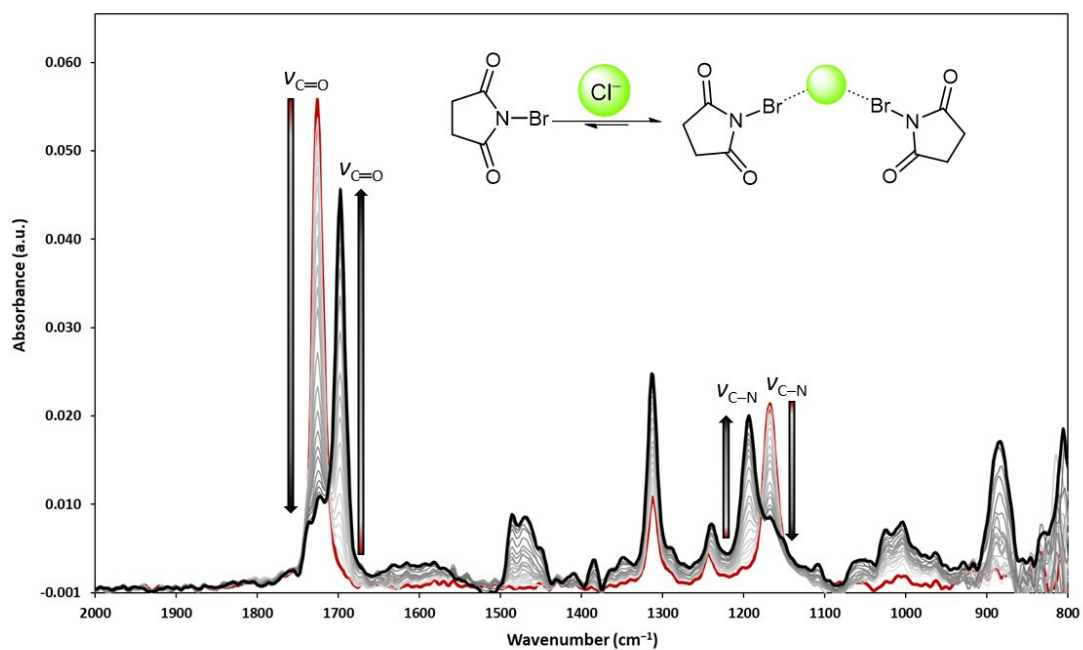

**Figure S26.** Full *in situ* FTIR titration spectra of NBS (20.3 mM) and TBACl in MeCN solution at 298 K.

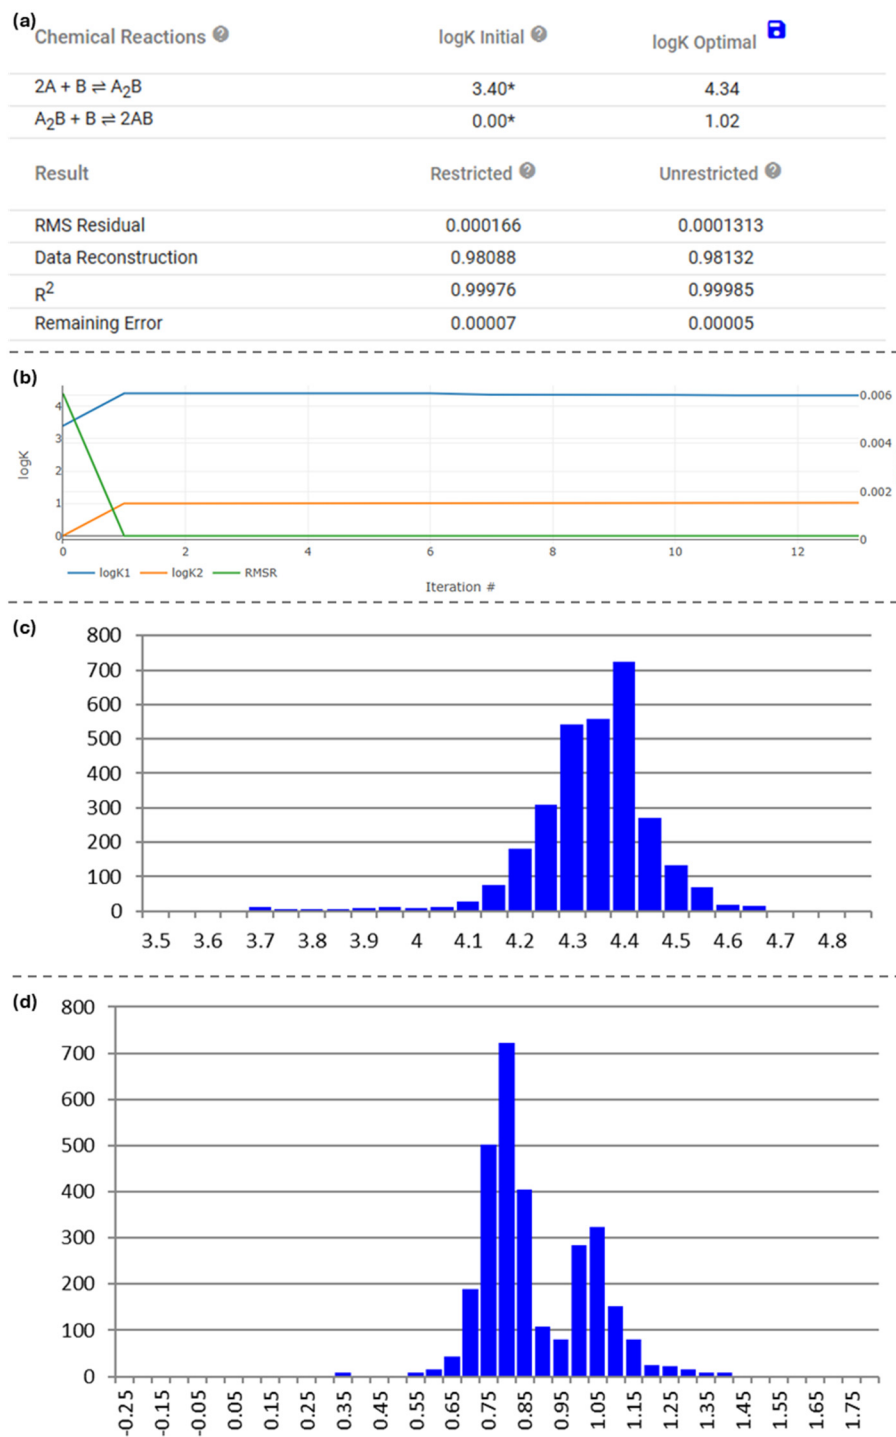

**Figure S27.** Representative (a) summary table, (b) fitted data, and (c) combined histograms (1000 bootstraps for each trial) for uncertainty analysis for  $K_{2:1}$  and  $K_{1:1}$  (c and d) for NBS (20.3 mM) and TBACl in MeCN solution.

**Table S7.** Summary of *in situ* FTIR titration data for NBS (20.3 mM) and TBACl in MeCN solution.

| Trial   | $\log K_{2:1}$ | 95% confidence interval | $\log K_{1:1}$ | 95% confidence interval |
|---------|----------------|-------------------------|----------------|-------------------------|
| 1       | 4.39           | [3.89, 4.51]            | 1.00           | [0.88, 1.26]            |
| 2       | 4.27           | [4.15, 4.53]            | 0.90           | [0.88, 0.98]            |
| 3       | 4.56           | [4.18, 4.56]            | 0.78           | [0.63, 0.94]            |
| Average | 4.41           | [4.07, 4.53]            | 0.89           | [0.65, 1.16]            |

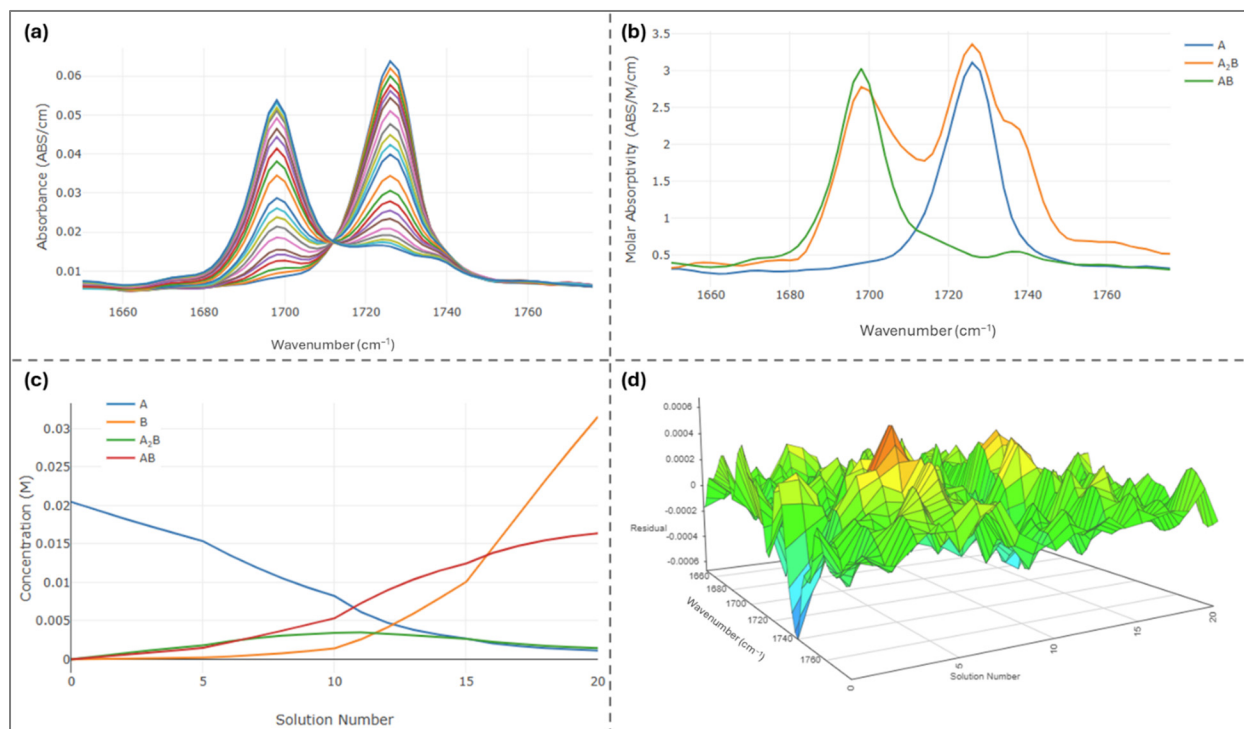

**Figure S28.** (a) *in situ* FTIR titration spectra of NBS (20.3 mM) and TBACl in MeCN solution at 298 K. (b) Molar absorptivity plots of the host (blue), 2:1 host-guest complex (yellow), and 1:1 host-guest complex (green). (c) Concentration data of different host (A, blue), guest (B, yellow), 2:1 host-guest complex (A<sub>2</sub>B, green), and 1:1 host-guest complex (AB, red) (d) Residuals obtained from data fitting.

### S1.3.2.9 Details and results of *in situ* FTIR titration for NBS and TBABr

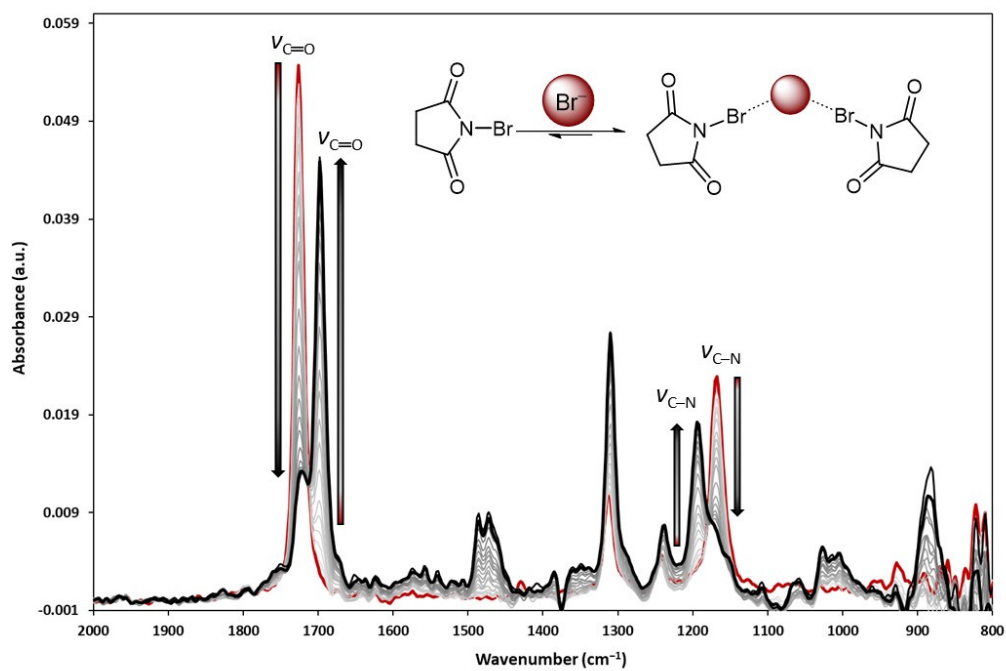

**Figure S29.** Full *in situ* FTIR titration spectra of NBS (18.2 mM) and TBABr in MeCN solution at 298 K.

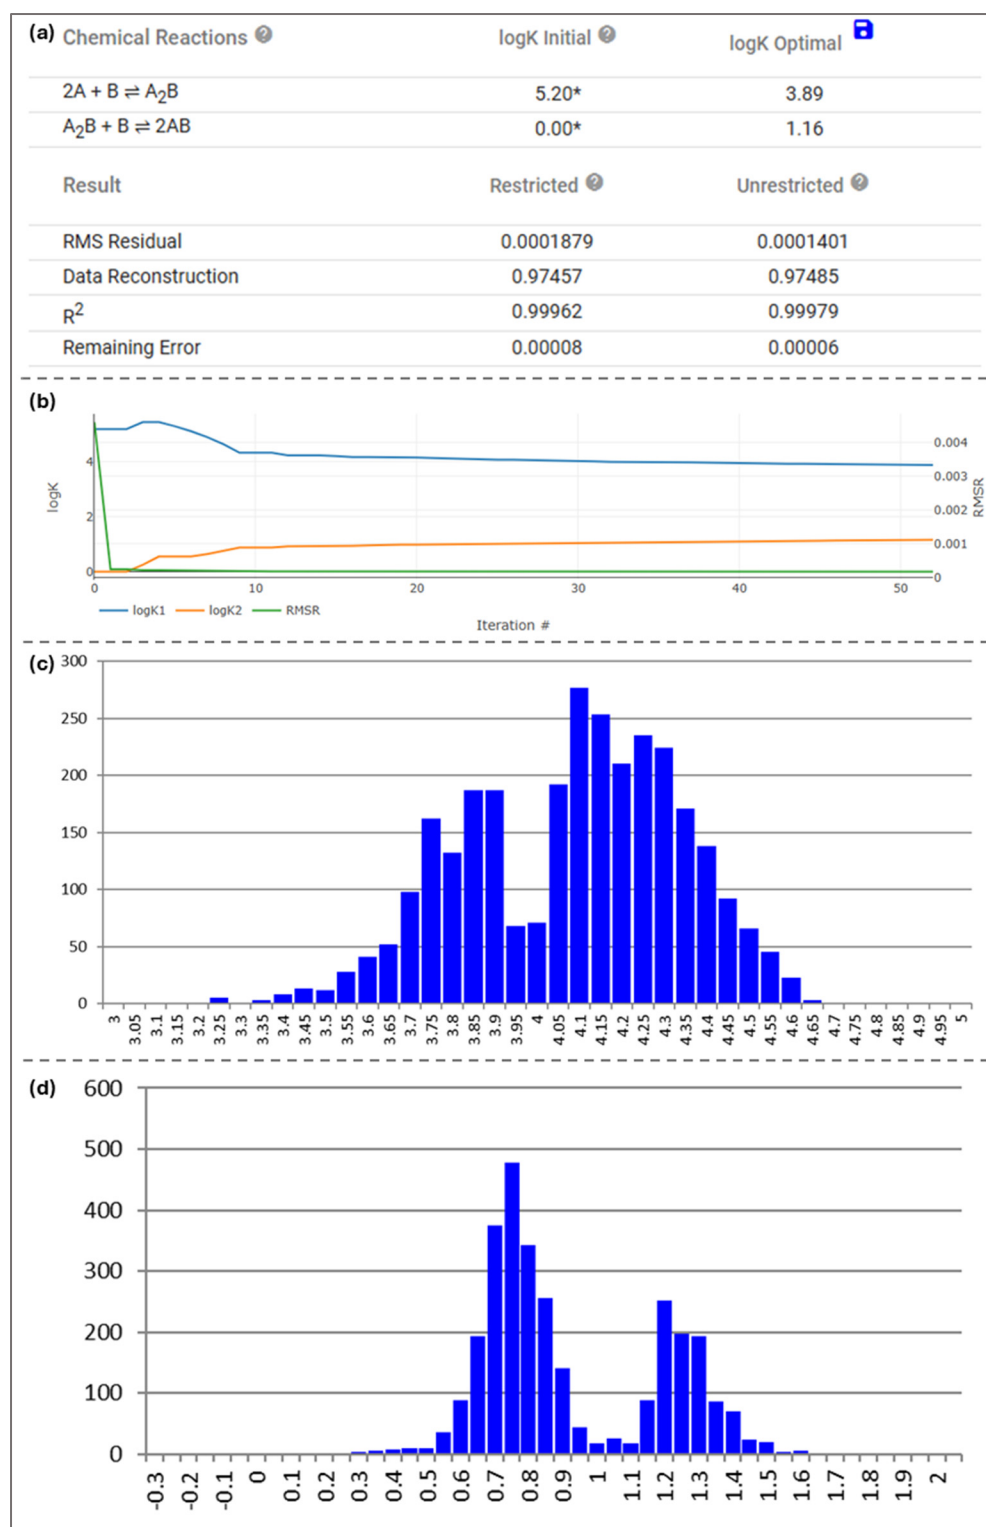

**Figure S30.** Representative (a) summary table, (b) fitted data, and (c) combined histograms (1000 bootstraps for each trial) for uncertainty analysis for  $K_{2:1}$  and  $K_{1:1}$  (c and d) for NBS (18.2mM) and TBABr in MeCN solution.

**Table S8.** Summary of *in situ* FTIR titration data for NBS (18.2 mM) and TBABr in MeCN solution.

| Trial   | $\log K_{2:1}$ | 95% confidence interval | $\log K_{1:1}$ | 95% confidence interval |
|---------|----------------|-------------------------|----------------|-------------------------|
| 1       | 4.13           | [3.95, 4.13]            | 0.78           | [0.54, 0.91]            |
| 2       | 4.27           | [3.99, 4.56]            | 0.73           | [0.48, 0.90]            |
| 3       | 3.89           | [3.44, 3.96]            | 1.16           | [1.03, 1.46]            |
| Average | 4.10           | [3.68, 4.49]            | 0.89           | [0.55, 1.38]            |

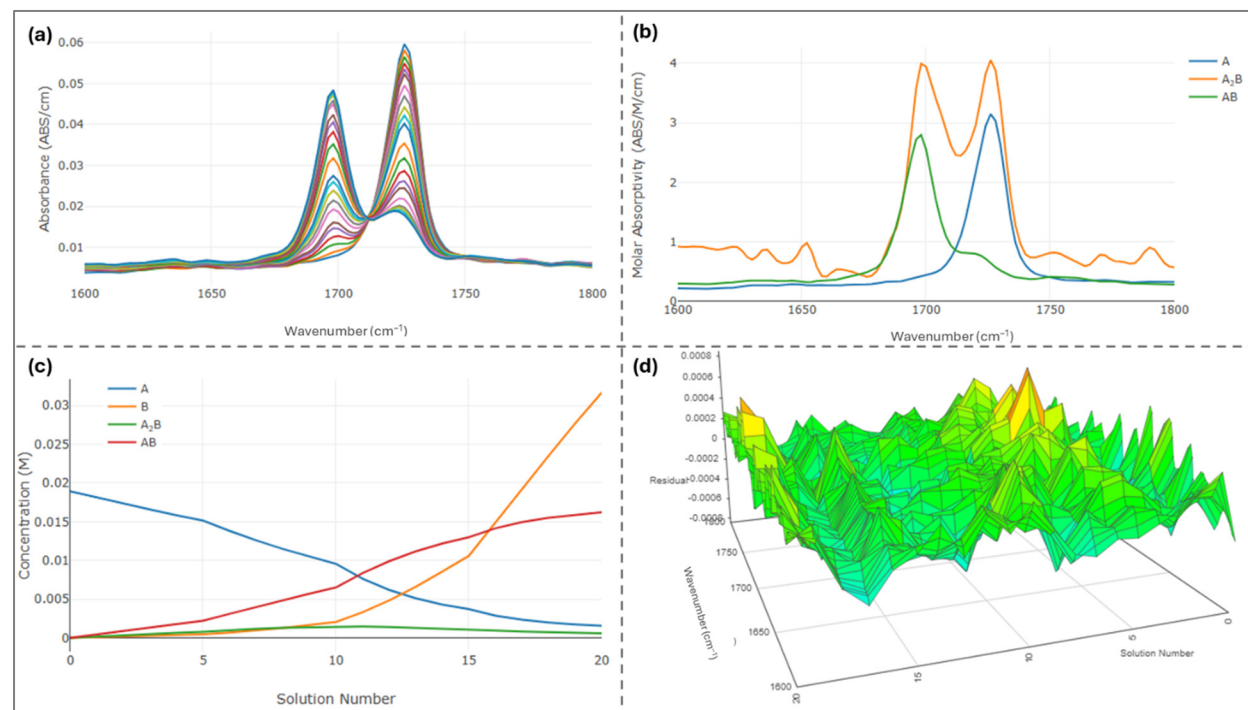

**Figure S31.** (a) *in situ* FTIR titration spectra of NBS (18.2 mM) and TBABr in MeCN solution at 298 K. (b) Molar absorptivity plots of the host (blue), 2:1 host-guest complex (yellow), and 1:1 host-guest complex (green). (c) Concentration data of different host (A, blue), guest (B, yellow), 2:1 host-guest complex (A<sub>2</sub>B, green), and 1:1 host-guest complex (AB, red) (d) Residuals obtained from data fitting.

### S1.3.3 $^1\text{H}$ NMR titrations

All NMR titrations were collected at 25 °C on a Varian Inova-500 instrument. All chemical shifts ( $\delta$ ) are reported in ppm relative to residue  $\text{CHD}_2\text{CN}$  ( $^1\text{H}$ : 1.940 ppm) or acetone- $d_6$  ( $^1\text{H}$ : 2.05 ppm). Stock solutions of the receptor D/H-IPr- $\text{PF}_6$  and  $p\text{-CF}_3\text{-tren}$  (*tris*)urea were prepared in either dry acetone- $d_6$  or 20%DMSO- $d_6$  in  $\text{MeCN-}d_3$ . To maintain a constant host concentration during the course of the titration, each guest was dissolved in 2 mL of the host solution at the desired concentrations and transferred to septum-sealed vials.<sup>5</sup> The host stock solution (500  $\mu\text{L}$ ) was added to three separate NMR tubes equipped with septum-sealed screw caps. After the collection of a background  $^1\text{H}$  NMR spectrum, an aliquot of the TBAX solution was added to the NMR tube using a gas-tight syringe, and the resultant  $^1\text{H}$  NMR spectrum was recorded. Titration data were fit using parametric equilibrium-restricted global analysis (PERGA) using the SIVVU program.<sup>6</sup> Different fitting models were tested to confirm the best fit from each set of data. Titrations were performed in triplicate, and the final values reported in each table are the average of  $K_a$  and the histogram of combined 95% confidence intervals for the three titrations.<sup>7</sup>

S1.3.3.1 Details and results of  $^1\text{H}$  NMR titration for D-IPr-PF<sub>6</sub> (1.4 mM) and TBACl **Table S9**.  
Representative titration data of D-IPr-PF<sub>6</sub> (1.4 mM) with Cl<sup>-</sup>.

|           | V guest (μL) | equiv. guest | [host] (M) | [guest] (M) | δ1 (ppm) | δ2 (ppm) | δ3 (ppm) |
|-----------|--------------|--------------|------------|-------------|----------|----------|----------|
| <b>1</b>  | 0            | 0.00         | 0.00137    | 0.000       | 8.4568   | 7.7135   | 7.5664   |
| <b>2</b>  | 2            | 0.29         | 0.00137    | 0.000396    | 8.4516   | 7.7076   | 7.5603   |
| <b>3</b>  | 4            | 0.58         | 0.00137    | 0.000788    | 8.4493   | 7.7045   | 7.5569   |
| <b>4</b>  | 6            | 0.86         | 0.00137    | 0.00118     | 8.4460   | 7.7002   | 7.5525   |
| <b>5</b>  | 8            | 1.14         | 0.00137    | 0.00156     | 8.4428   | 7.6961   | 7.5484   |
| <b>6</b>  | 10           | 1.42         | 0.00137    | 0.00195     | 8.4410   | 7.6936   | 7.5459   |
| <b>7</b>  | 12           | 1.70         | 0.00137    | 0.00233     | 8.4384   | 7.6903   | 7.5425   |
| <b>8</b>  | 14           | 1.98         | 0.00137    | 0.00270     | 8.4380   | 7.6891   | 7.5413   |
| <b>9</b>  | 16           | 2.25         | 0.00137    | 0.00308     | 8.4356   | 7.6861   | 7.5383   |
| <b>10</b> | 18           | 2.52         | 0.00137    | 0.00345     | 8.4353   | 7.6852   | 7.5372   |
| <b>11</b> | 20           | 2.79         | 0.00137    | 0.00382     | 8.4325   | 7.6821   | 7.5339   |
| <b>12</b> | 25           | 3.45         | 0.00137    | 0.00473     | 8.4307   | 7.6791   | 7.5309   |
| <b>13</b> | 30           | 4.11         | 0.00137    | 0.00562     | 8.4292   | 7.6762   | 7.5280   |
| <b>14</b> | 40           | 5.37         | 0.00137    | 0.00736     | 8.4262   | 7.6709   | 7.5224   |
| <b>15</b> | 50           | 6.59         | 0.00137    | 0.00903     | 8.4240   | 7.6662   | 7.5176   |
| <b>16</b> | 100          | 12.09        | 0.00137    | 0.0165      | 8.4211   | 7.6557   | 7.5063   |

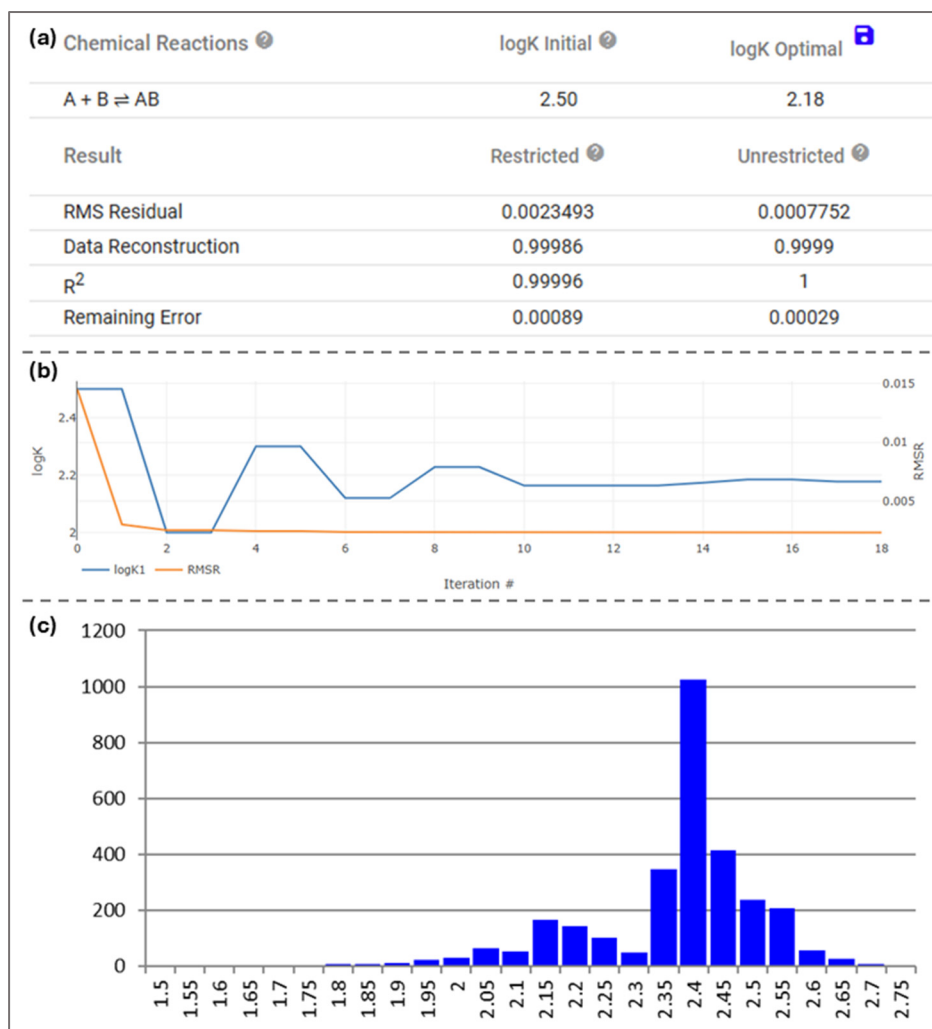

**Figure S32.** Representative (a) summary table, (b) fitted data, and (c) combined histograms (1000 bootstraps for each trial) for uncertainty analysis for D-IPr-PF<sub>6</sub> (1.4 mM) with Cl<sup>−</sup> in dry acetone-*d*<sub>6</sub>.

**Table S10.** Summary of <sup>1</sup>H NMR titration data for D-IPr-PF<sub>6</sub> (1.4 mM) and TBACl in dry acetone-*d*<sub>6</sub>.

| Trial   | log <i>K</i> <sub>1:1</sub> | 95% confidence interval |
|---------|-----------------------------|-------------------------|
| 1       | 2.44                        | [2.30, 2.51]            |
| 2       | 2.18                        | [1.85, 2.62]            |
| 3       | 2.38                        | [2.32, 2.52]            |
| Average | 2.33                        | [1.97, 2.56]            |

S1.3.3.2 Details and results of  $^1\text{H}$  NMR titration for H-IPr·PF<sub>6</sub> (1.3 mM) and TBACl

**Table S11.** Representative titration data of H-IPr·PF<sub>6</sub> (1.3 mM) with Cl<sup>−</sup>.

|           | V guest (μL) | equiv. guest | [host] (M) | [guest] (M) | δ1 (ppm) | δ2 (ppm) | δ3 (ppm) |
|-----------|--------------|--------------|------------|-------------|----------|----------|----------|
| <b>1</b>  | 0            | 0.00         | 0.00127    | 0.000       | 9.8213   | 8.4586   | 7.7140   |
| <b>2</b>  | 2            | 0.38         | 0.00127    | 0.000487    | 10.0454  | 8.4488   | 7.7053   |
| <b>3</b>  | 4            | 0.76         | 0.00127    | 0.00097     | 10.2172  | 8.4426   | 7.6998   |
| <b>4</b>  | 6            | 1.14         | 0.00127    | 0.001451    | 10.3473  | 8.4371   | 7.6948   |
| <b>5</b>  | 8            | 1.51         | 0.00127    | 0.00193     | 10.4550  | 8.4336   | 7.6911   |
| <b>6</b>  | 10           | 1.89         | 0.00127    | 0.00240     | 10.5547  | 8.4289   | 7.6870   |
| <b>7</b>  | 12           | 2.25         | 0.00127    | 0.00287     | 10.6313  | 8.4245   | 7.6824   |
| <b>8</b>  | 14           | 2.62         | 0.00127    | 0.00333     | 10.7004  | 8.4224   | 7.6808   |
| <b>9</b>  | 16           | 2.98         | 0.00127    | 0.00379     | 10.7688  | 8.4214   | 7.6794   |
| <b>10</b> | 18           | 3.34         | 0.00127    | 0.00425     | 10.8080  | 8.4180   | 7.6762   |
| <b>11</b> | 20           | 3.70         | 0.00127    | 0.00470     | 10.8671  | 8.4158   | 7.6737   |
| <b>12</b> | 25           | 4.58         | 0.00127    | 0.00583     | 10.9748  | 8.4134   | 7.6708   |
| <b>13</b> | 40           | 7.12         | 0.00127    | 0.00906     | 11.2158  | 8.4063   | 7.6619   |
| <b>14</b> | 50           | 8.74         | 0.00127    | 0.0111      | 11.3272  | 8.4045   | 7.6586   |
| <b>15</b> | 100          | 16.03        | 0.00127    | 0.0204      | 11.6147  | 8.4005   | 7.6469   |
| <b>16</b> | 150          | 22.19        | 0.00127    | 0.0282      | 11.7835  | 8.4010   | 7.6397   |

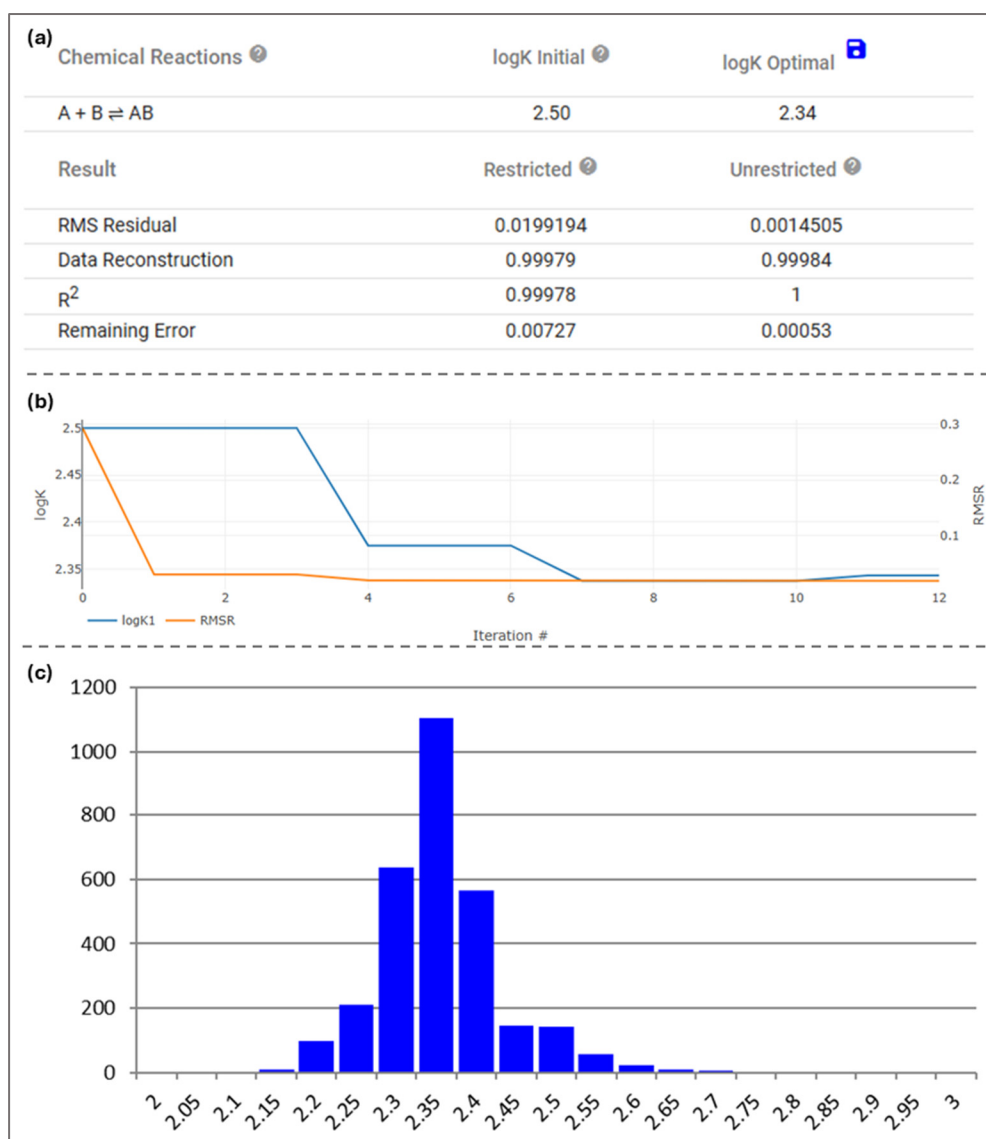

**Figure S33.** Representative (a) summary table, (b) fitted data, and (c) combined histograms (1000 bootstraps for each trial) for uncertainty analysis for H-IPr·PF<sub>6</sub> (1.3 mM) with Cl<sup>−</sup> in dry acetone-*d*<sub>6</sub>.

**Table S12.** Summary of <sup>1</sup>H NMR titration data for H-IPr·PF<sub>6</sub> (1.3 mM) and TBACl in dry acetone-*d*<sub>6</sub>.

| Trial   | log <i>K</i> <sub>1:1</sub> | 95% confidence interval |
|---------|-----------------------------|-------------------------|
| 1       | 2.31                        | [2.18, 2.49]            |
| 2       | 2.32                        | [2.19, 2.48]            |
| 3       | 2.34                        | [2.18, 2.53]            |
| Average | 2.32                        | [2.19, 2.51]            |

S1.3.3.3 Details and results of  $^1\text{H}$  NMR titration for H-IPr $\cdot$ PF $_6$  (48.9 mM) and TBACl

**Table S13.** Representative titration data of H-IPr $\cdot$ PF $_6$  (48.9 mM) with Cl $^-$ .

|           | V guest ( $\mu\text{L}$ ) | equiv. guest | [host] (M) | [guest] (M) | $\delta 1$ (ppm) | $\delta 2$ (ppm) | $\delta 3$ (ppm) |
|-----------|---------------------------|--------------|------------|-------------|------------------|------------------|------------------|
| <b>1</b>  | 0                         | 0.00         | 0.0489     | 0.000       | 9.7916           | 8.4283           | 7.5578           |
| <b>2</b>  | 2                         | 0.08         | 0.0489     | 0.00382     | 9.9018           | 8.4260           | 7.5485           |
| <b>3</b>  | 4                         | 0.16         | 0.0489     | 0.00762     | 10.011           | 8.4259           | 7.5483           |
| <b>4</b>  | 6                         | 0.23         | 0.0489     | 0.01138     | 10.1079          | 8.4238           | 7.5422           |
| <b>5</b>  | 8                         | 0.31         | 0.0489     | 0.0151      | 10.1991          | 8.4232           | 7.5395           |
| <b>6</b>  | 10                        | 0.38         | 0.0489     | 0.0188      | 10.2808          | 8.4223           | 7.5354           |
| <b>7</b>  | 15                        | 0.57         | 0.0489     | 0.0279      | 10.4527          | 8.4216           | 7.5287           |
| <b>8</b>  | 20                        | 0.75         | 0.0489     | 0.0369      | 10.6023          | 8.4207           | 7.5220           |
| <b>9</b>  | 25                        | 0.93         | 0.0489     | 0.0457      | 10.7301          | 8.4201           | 7.5162           |
| <b>10</b> | 30                        | 1.11         | 0.0489     | 0.0543      | 10.8433          | 8.4212           | 7.5123           |
| <b>11</b> | 35                        | 1.28         | 0.0489     | 0.0628      | 10.9419          | 8.4216           | 7.5081           |
| <b>12</b> | 60                        | 2.10         | 0.0489     | 0.103       | 11.1146          | 8.4226           | 7.5002           |
| <b>13</b> | 85                        | 2.85         | 0.0489     | 0.139       | 11.2546          | 8.4235           | 7.4948           |
| <b>14</b> | 110                       | 3.54         | 0.0489     | 0.173       | 11.3743          | 8.4287           | 7.4904           |
| <b>15</b> | 135                       | 4.17         | 0.0489     | 0.204       | 11.4765          | 8.4319           | 7.4861           |
| <b>16</b> | 160                       | 4.76         | 0.0489     | 0.233       | 11.5652          | 8.4352           | 7.4820           |

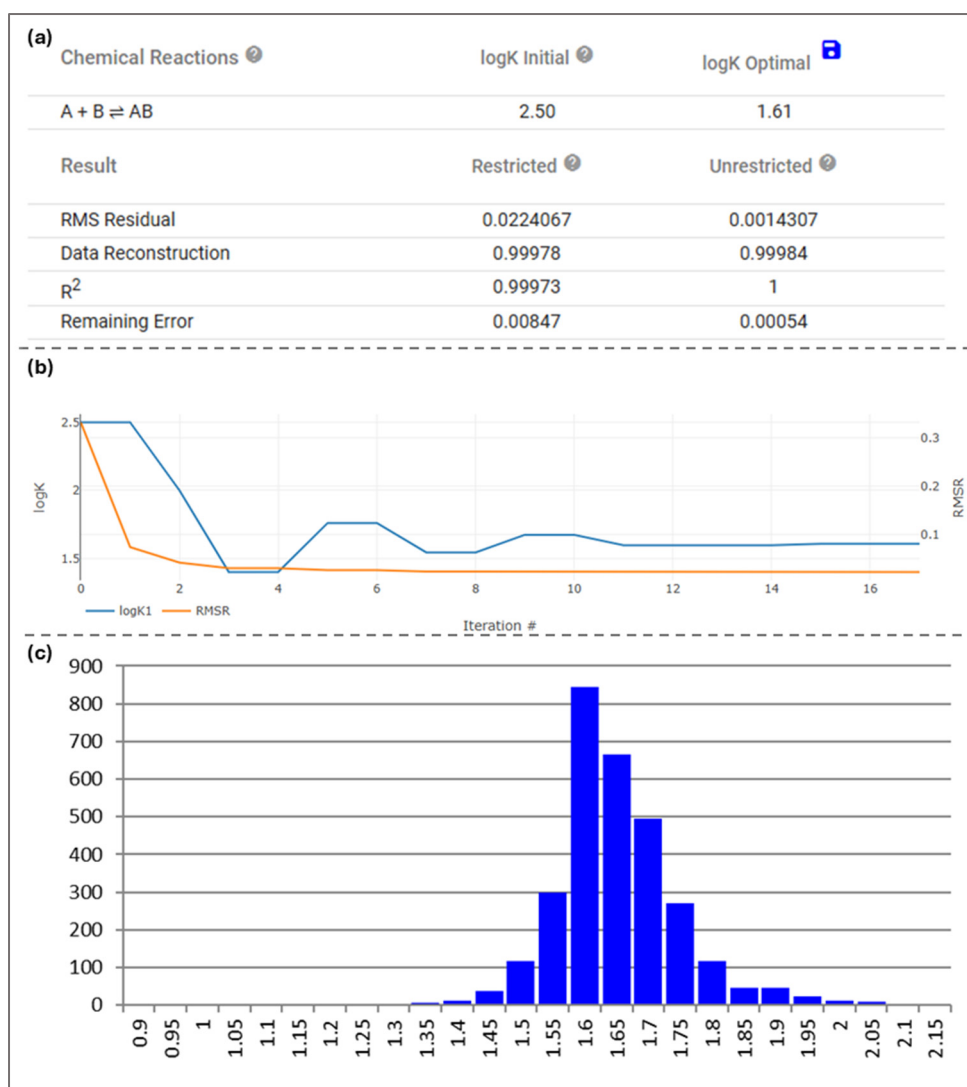

**Figure S34.** Representative (a) summary table, (b) fitted data, and (c) combined histograms (1000 bootstraps for each trial) for uncertainty analysis for H-IPr-PF<sub>6</sub> (48.9 mM) with Cl<sup>-</sup> in dry acetone-*d*<sub>6</sub>.

**Table S14.** Summary of <sup>1</sup>H NMR titration data for H-IPr-PF<sub>6</sub> (48.9 mM) and TBACl in dry acetone-*d*<sub>6</sub>.

| Trial   | log <i>K</i> <sub>1:1</sub> | 95% confidence interval |
|---------|-----------------------------|-------------------------|
| 1       | 1.59                        | [1.46, 1.89]            |
| 2       | 1.57                        | [1.47, 1.85]            |
| 3       | 1.61                        | [1.47, 1.85]            |
| Average | 1.59                        | [1.46, 1.87]            |

S1.3.3.4 Details and results of  $^1\text{H}$  NMR titration for *p*-CF<sub>3</sub>-tren-trisurea (14.1 mM) with TBANO<sub>3</sub>

**Table S15.** Representative titration data of *p*-CF<sub>3</sub>-tren-trisurea (14.1 mM) with NO<sub>3</sub><sup>−</sup>.

|           | V guest (μL) | equiv. guest | [host] (M) | [guest] (M) | δ1 (ppm) | δ2 (ppm) | δ3 (ppm) |
|-----------|--------------|--------------|------------|-------------|----------|----------|----------|
| <b>1</b>  | 0            | 0.00         | 0.0141     | 0.000       | 8.5799   | 7.4782   | 6.1775   |
| <b>2</b>  | 2            | 0.05         | 0.0141     | 0.000772    | 8.5863   | 7.4817   | 6.1857   |
| <b>3</b>  | 4            | 0.11         | 0.0141     | 0.00154     | 8.5918   | 7.4845   | 6.1951   |
| <b>4</b>  | 6            | 0.16         | 0.0141     | 0.00230     | 8.5967   | 7.4868   | 6.2033   |
| <b>5</b>  | 8            | 0.22         | 0.0141     | 0.00305     | 8.6021   | 7.4897   | 6.2118   |
| <b>6</b>  | 10           | 0.27         | 0.0141     | 0.00380     | 8.6073   | 7.4922   | 6.2200   |
| <b>7</b>  | 15           | 0.40         | 0.0141     | 0.00564     | 8.6197   | 7.4980   | 6.2392   |
| <b>8</b>  | 20           | 0.53         | 0.0141     | 0.00745     | 8.6301   | 7.5024   | 6.2556   |
| <b>9</b>  | 25           | 0.66         | 0.0141     | 0.00923     | 8.6402   | 7.5071   | 6.2712   |
| <b>10</b> | 30           | 0.78         | 0.0141     | 0.0110      | 8.6499   | 7.5118   | 6.2859   |
| <b>11</b> | 35           | 0.90         | 0.0141     | 0.0127      | 8.6585   | 7.5154   | 6.2988   |
| <b>12</b> | 45           | 1.14         | 0.0141     | 0.0160      | 8.6734   | 7.5218   | 6.3214   |
| <b>13</b> | 55           | 1.36         | 0.0141     | 0.0192      | 8.6865   | 7.5277   | 6.3409   |
| <b>14</b> | 65           | 1.58         | 0.0141     | 0.0223      | 8.6984   | 7.5323   | 6.3571   |
| <b>15</b> | 75           | 1.80         | 0.0141     | 0.0253      | 8.7083   | 7.5362   | 6.3714   |
| <b>16</b> | 85           | 2.00         | 0.0141     | 0.0281      | 8.7171   | 7.5398   | 6.3836   |
| <b>17</b> | 110          | 2.48         | 0.0141     | 0.0349      | 8.7349   | 7.5460   | 6.4073   |

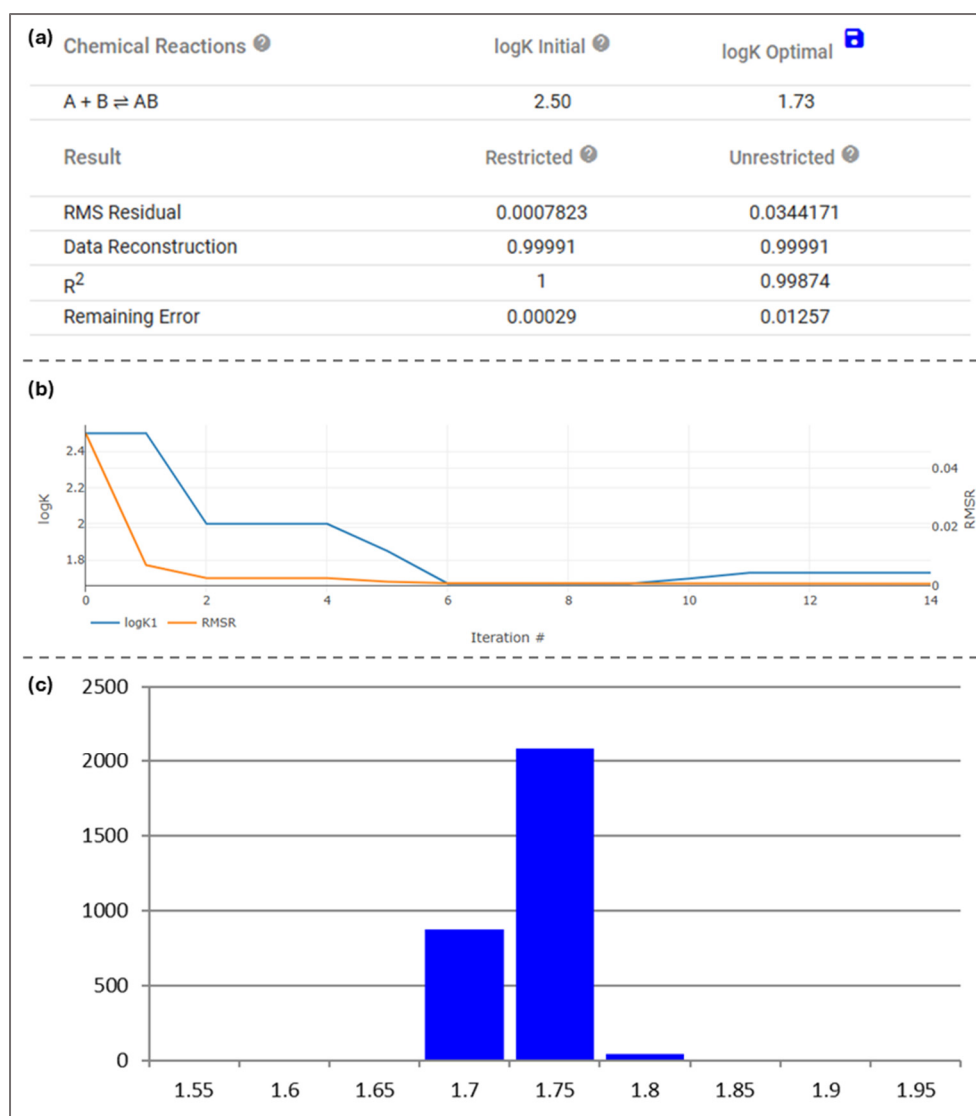

**Figure S35.** Representative (a) summary table, (b) fitted data, and (c) combined histograms (1000 bootstraps for each trial) for uncertainty analysis for *p*-CF<sub>3</sub>-tren (*tris*)urea (14.1 mM) and TBANO<sub>3</sub> in dry 20% DMSO-*d*<sub>6</sub> in MeCN-*d*<sub>3</sub> solution.

**Table S16.** Summary of <sup>1</sup>H NMR titration data for *p*-CF<sub>3</sub>-tren (*tris*)urea (14.1 mM) and TBANO<sub>3</sub> in dry 20% DMSO-*d*<sub>6</sub> in MeCN-*d*<sub>3</sub> solution.

| Trial   | log <i>K</i> <sub>1:1</sub> | 95% confidence interval |
|---------|-----------------------------|-------------------------|
| 1       | 1.72                        | [1.70, 1.73]            |
| 2       | 1.71                        | [1.69, 1.73]            |
| 3       | 1.73                        | [1.69, 1.76]            |
| Average | 1.72                        | [1.69, 1.74]            |

S1.3.3.5 Details and results of  $^1\text{H}$  NMR titration for *p*-CF<sub>3</sub>-tren-trisurea (14.1 mM) with TBAHSO<sub>4</sub>

**Table S17.** Representative titration data of *p*-CF<sub>3</sub>-tren-trisurea (14.1 mM) with HSO<sub>4</sub><sup>−</sup>.

|           | V guest (μL) | equiv. guest | [host] (M) | [guest] (M) | δ1 (ppm) | δ2 (ppm) | δ3 (ppm) |
|-----------|--------------|--------------|------------|-------------|----------|----------|----------|
| <b>1</b>  | 0            | 0.00         | 0.0141     | 0.000       | 8.5929   | 7.4835   | 6.1777   |
| <b>2</b>  | 2            | 0.05         | 0.0141     | 0.000763    | 8.6917   | 7.4948   | 6.3198   |
| <b>3</b>  | 4            | 0.11         | 0.0141     | 0.00152     | 8.7959   | 7.5076   | 6.4553   |
| <b>4</b>  | 6            | 0.16         | 0.0141     | 0.00227     | 8.9082   | 7.5232   | 6.5798   |
| <b>5</b>  | 8            | 0.21         | 0.0141     | 0.00301     | 9.0026   | 7.5249   | 6.7268   |
| <b>6</b>  | 10           | 0.27         | 0.0141     | 0.00375     | 9.1036   | 7.5355   | 6.8592   |
| <b>7</b>  | 15           | 0.39         | 0.0141     | 0.00558     | 9.3044   | 7.5514   | 7.1068   |
| <b>8</b>  | 20           | 0.52         | 0.0141     | 0.00736     | 9.3980   | 7.5522   | 7.2503   |
| <b>9</b>  | 25           | 0.65         | 0.0141     | 0.00912     | 9.4352   | 7.5518   | 7.3116   |
| <b>10</b> | 30           | 0.77         | 0.0141     | 0.0108      | 9.4569   | 7.5530   | 7.3460   |
| <b>11</b> | 35           | 0.89         | 0.0141     | 0.0125      | 9.4737   | 7.556    | 7.3714   |
| <b>12</b> | 40           | 1.00         | 0.0141     | 0.0142      | 9.4851   | 7.5568   | 7.3881   |
| <b>13</b> | 45           | 1.12         | 0.0141     | 0.0158      | 9.4956   | 7.5584   | 7.4032   |
| <b>14</b> | 50           | 1.23         | 0.0141     | 0.0174      | 9.5041   | 7.5595   | 7.4151   |
| <b>15</b> | 55           | 1.34         | 0.0141     | 0.0190      | 9.5110   | 7.5595   | 7.4247   |
| <b>16</b> | 60           | 1.45         | 0.0141     | 0.0205      | 9.5190   | 7.5621   | 7.4351   |
| <b>17</b> | 70           | 1.66         | 0.0141     | 0.0235      | 9.5270   | 7.5623   | 7.4455   |
| <b>18</b> | 80           | 1.87         | 0.0141     | 0.0264      | 9.5382   | 7.5643   | 7.4597   |

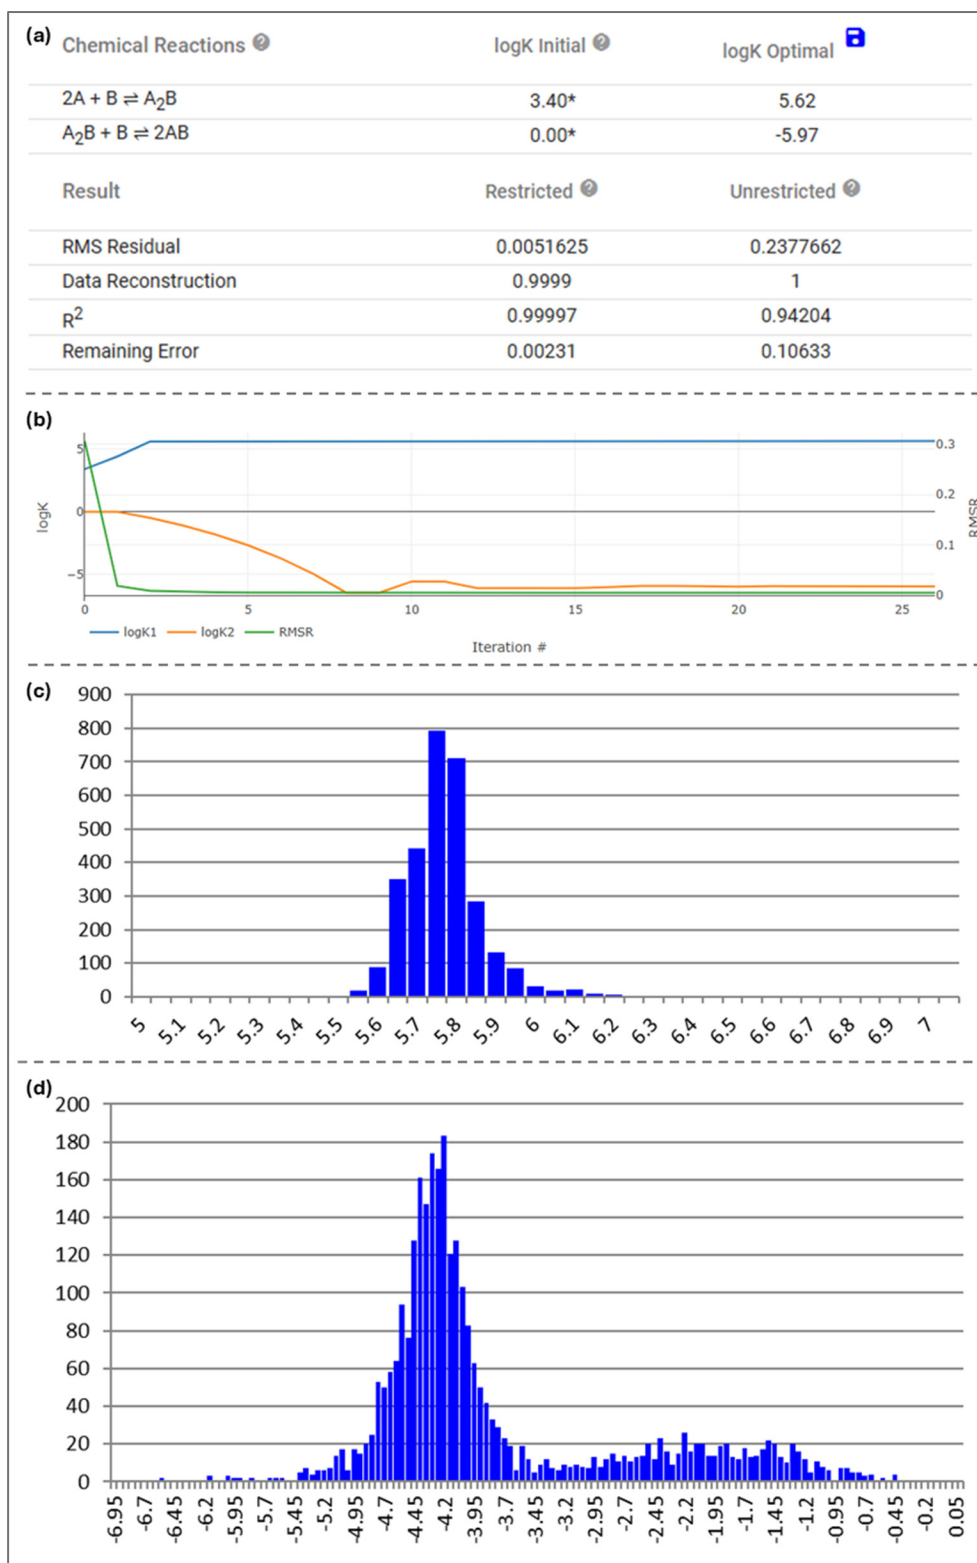

**Figure S36.** Representative (a) summary table, (b) fitted data, and (c,d) combined histograms (1000 bootstraps for each trial) for uncertainty analysis for  $K_{2:1}$  and  $K_{1:1}$  (c and d) for *p*-CF<sub>3</sub>-tren-*tris*urea (14.1 mM) and TBAHSO<sub>4</sub> in dry 20% DMSO-*d*<sub>6</sub> in MeCN-*d*<sub>3</sub> solution.

**Table S18.** Summary of  $^1\text{H}$  NMR titration data for *p*-CF<sub>3</sub>-tren-trisurea (14.1 mM) and TBAHSO<sub>4</sub> in dry 20% DMSO-*d*<sub>6</sub> in MeCN-*d*<sub>3</sub> solution.

| Trial   | log $K_{2:1}$ | 95% confidence interval | log $K_{1:1}$ | 95% confidence interval |
|---------|---------------|-------------------------|---------------|-------------------------|
| 1       | 5.62          | [5.59, 6.02]            | −5.97         | [−6.97, −1.03]          |
| 2       | 5.71          | [5.59, 5.96]            | −5.55         | [−6.18, −1.22]          |
| 3       | 5.74          | [5.59, 5.96]            | −4.32         | [−5.12, −1.23]          |
| Average | 5.69          | [5.59, 5.98]            | −5.28         | [−5.20, −1.15]          |

S1.3.3.6 Details and results of  $^1\text{H}$  NMR titration for *p*-CF<sub>3</sub>-tren-trisurea (14.1 mM) with TBAOCN

**Table S19.** Representative titration data of *p*-CF<sub>3</sub>-tren-trisurea (14.1 mM) with OCN<sup>−</sup>.

|    | V guest (μL) | equiv. guest | [host] (M) | [guest] (M) | δ1 (ppm) | δ2 (ppm) | δ3 (ppm) |
|----|--------------|--------------|------------|-------------|----------|----------|----------|
| 1  | 0            | 0            | 0.0141     | 0.000       | 8.5830   | 7.4819   | 6.1804   |
| 2  | 2            | 0.08         | 0.0141     | 0.00111     | 8.6318   | 7.4893   | 6.2189   |
| 3  | 4            | 0.16         | 0.0141     | 0.00221     | 8.6793   | 7.4973   | 6.2468   |
| 4  | 6            | 0.23         | 0.0141     | 0.00330     | 8.7272   | 7.5046   | 6.2638   |
| 5  | 8            | 0.31         | 0.0141     | 0.00438     | 8.7750   | 7.5124   | 6.2906   |
| 6  | 10           | 0.39         | 0.0141     | 0.00546     | 8.8212   | 7.5200   | 6.3169   |
| 7  | 15           | 0.57         | 0.0141     | 0.00812     | 8.9343   | 7.5378   | 6.3814   |
| 8  | 20           | 0.76         | 0.0141     | 0.0107      | 9.0398   | 7.5544   | 6.4404   |
| 9  | 25           | 0.94         | 0.0141     | 0.0133      | 9.1284   | 7.5676   | 6.4885   |
| 10 | 30           | 1.12         | 0.0141     | 0.0158      | 9.1934   | 7.5759   | 6.5213   |
| 11 | 35           | 1.29         | 0.0141     | 0.0182      | 9.2401   | 7.5800   | 6.5419   |
| 12 | 45           | 1.63         | 0.0141     | 0.0230      | 9.3092   | 7.5844   | 6.5695   |
| 13 | 55           | 1.95         | 0.0141     | 0.0276      | 9.3681   | 7.5868   | 6.5907   |
| 14 | 65           | 2.27         | 0.0141     | 0.0320      | 9.3926   | 7.588    | 6.5998   |
| 15 | 75           | 2.57         | 0.0141     | 0.0363      | 9.4385   | 7.5898   | 6.6212   |
| 16 | 85           | 2.86         | 0.0141     | 0.0404      | 9.4842   | 7.5911   | 6.6310   |

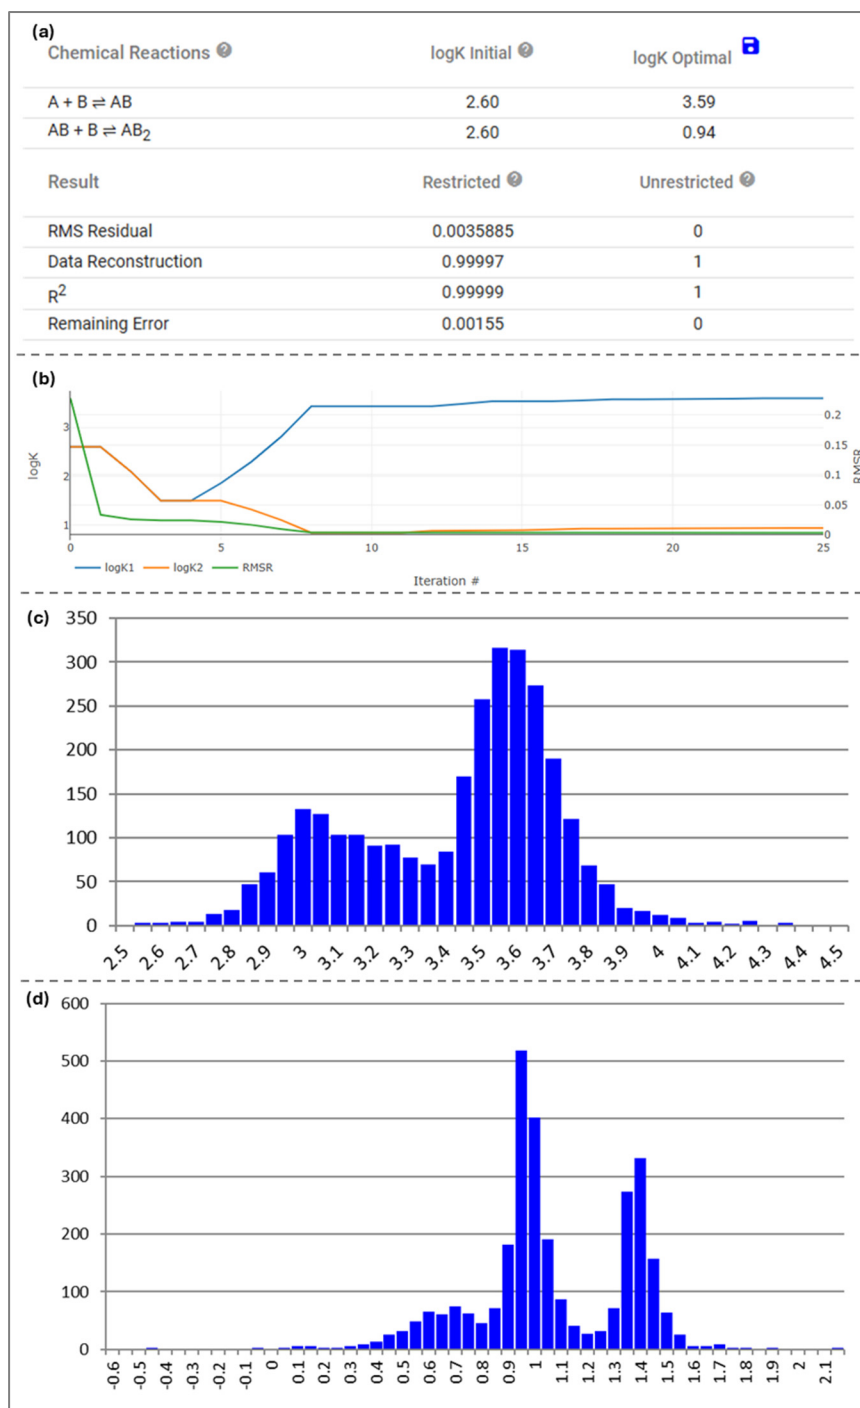

**Figure S37.** Representative (a) summary table, (b) fitted data, and (c,d) combined histograms (1000 bootstraps for each trial) for uncertainty analysis for  $K_{1:1}$  and  $K_{1:2}$  (c and d) for *p*-CF<sub>3</sub>-tren (*tris*)urea (14.1 mM) and TBAOCN in dry 20% DMSO-*d*<sub>6</sub> in MeCN-*d*<sub>3</sub> solution.

**Table S20.** Summary of  $^1\text{H}$  NMR titration data for *p*-CF<sub>3</sub>-tren (*tris*)urea (14.1 mM) and TBAOCN in dry 20% DMSO-*d*<sub>6</sub> in MeCN-*d*<sub>3</sub> solution.

| <b>Trial</b> | <b>log <math>K_{1:1}</math></b> | <b>95% confidence interval</b> | <b>log <math>K_{1:2}</math></b> | <b>95% confidence interval</b> |
|--------------|---------------------------------|--------------------------------|---------------------------------|--------------------------------|
| 1            | 2.98                            | [2.74, 3.57]                   | 1.35                            | [0.91, 1.54]                   |
| 2            | 3.45                            | [3.24, 3.96]                   | 0.64                            | [0.36, 1.14]                   |
| 3            | 3.59                            | [3.28, 3.96]                   | 0.94                            | [0.35, 1.24]                   |
| Average      | 3.34                            | [2.84, 3.95]                   | 0.98                            | [0.40, 1.48]                   |

#### S1.3.4 UV-vis titrations

UV-vis titration data were collected at 25 °C on a Cary 60 instrument. Before each titration experiment, a background of the acetonitrile (ACS grade) in a quartz cuvette (1.0 cm) sealed with a septa cap was collected. A stock solution of the host compound NBS (2.20 mM) in MeCN was prepared. To maintain a constant host concentration during the course of titration, guest (TBABr) was dissolved in 1.0 mL of the host solution.<sup>5</sup> The guest solution (TBABr) was added to the host solution using a microsyringe and allowed to equilibrate for 1 minute before data collection. The titration data were subjected to using parametric equilibrium-restricted global analysis (PERGA) using the SIVVU program.<sup>6</sup> Different fitting models were tested to confirm the best fit from each set of data. Titrations were performed in triplicate, where the final values reported in each table are the average of  $K_a$  and the histogram of combined 95% confidence intervals for the three titrations.<sup>7</sup>

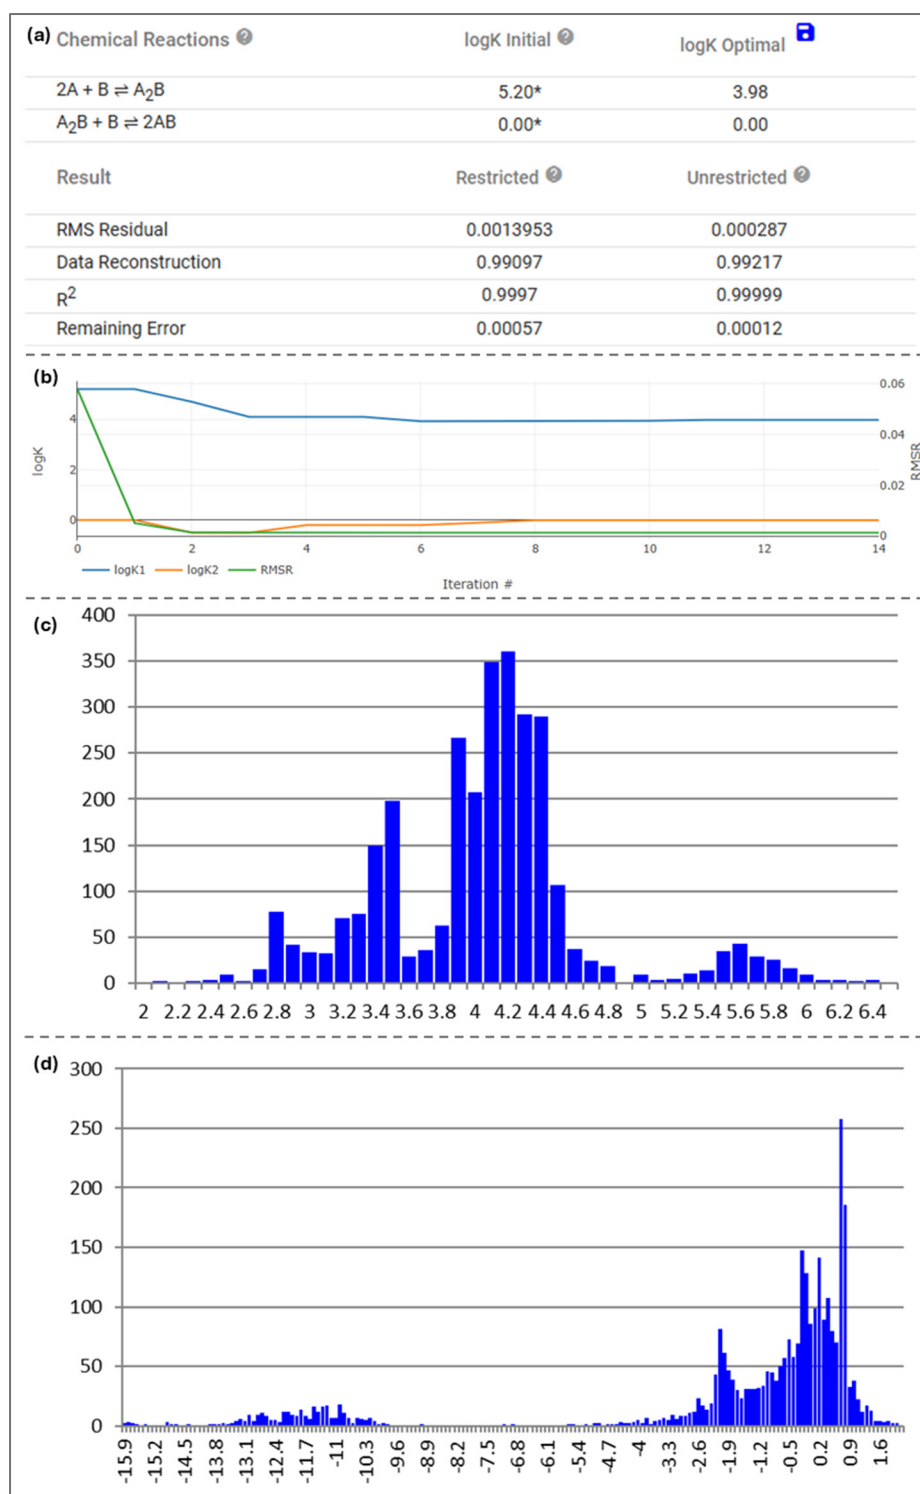

**Figure S38.** Representative (a) summary table, (b) fitted data, and (c,d) combined histograms (1000 bootstraps for each trial) for uncertainty analysis for  $K_{2:1}$  and  $K_{1:1}$  (c and d) for NBS (2.20 mM) and TBABr in MeCN solution.

Table S21. Summary of UV-vis titration data for NBS (2.20 mM) and TBABr in MeCN solution.

| Trial   | $\log K_{2:1}$ | 95% confidence interval | $\log K_{1:1}$ | 95% confidence interval |
|---------|----------------|-------------------------|----------------|-------------------------|
| 1       | 3.88           | [2.78, 5.33]            | 0.66           | [−1.31, 1.00]           |
| 2       | 4.26           | [3.92, 5.75]            | −3.34          | [−16.22, −0.25]         |
| 3       | 3.98           | [2.65, 4.63]            | 0.00           | [−10.96, 1.30]          |
| Average | 4.04           | [2.79, 5.68]            | −0.89          | [−13.20, 1.10]          |

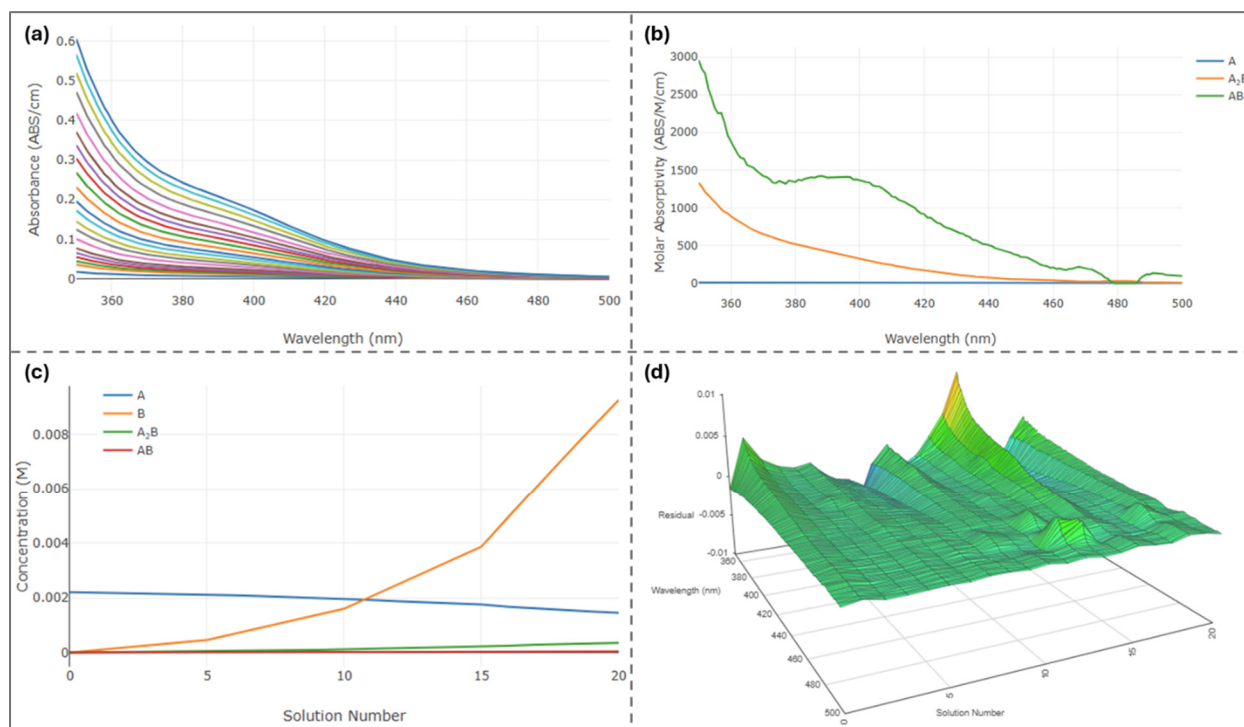

**Figure S39.** (a) UV-vis titration spectra of NBS (2.20 mM) and TBABr in MeCN solution mixture at 298 K. (b) Molar absorptivity plots of the host (blue), 2:1 host-guest complex (yellow), and 1:1 host-guest complex (green). (c) Concentration data of different host (A, blue), guest (B, yellow), 2:1 host-guest complex (A<sub>2</sub>B, green), and 1:1 host-guest complex (AB, red). (d) Residuals obtained from data fitting.

### S1.3.5 ATR-FTIR

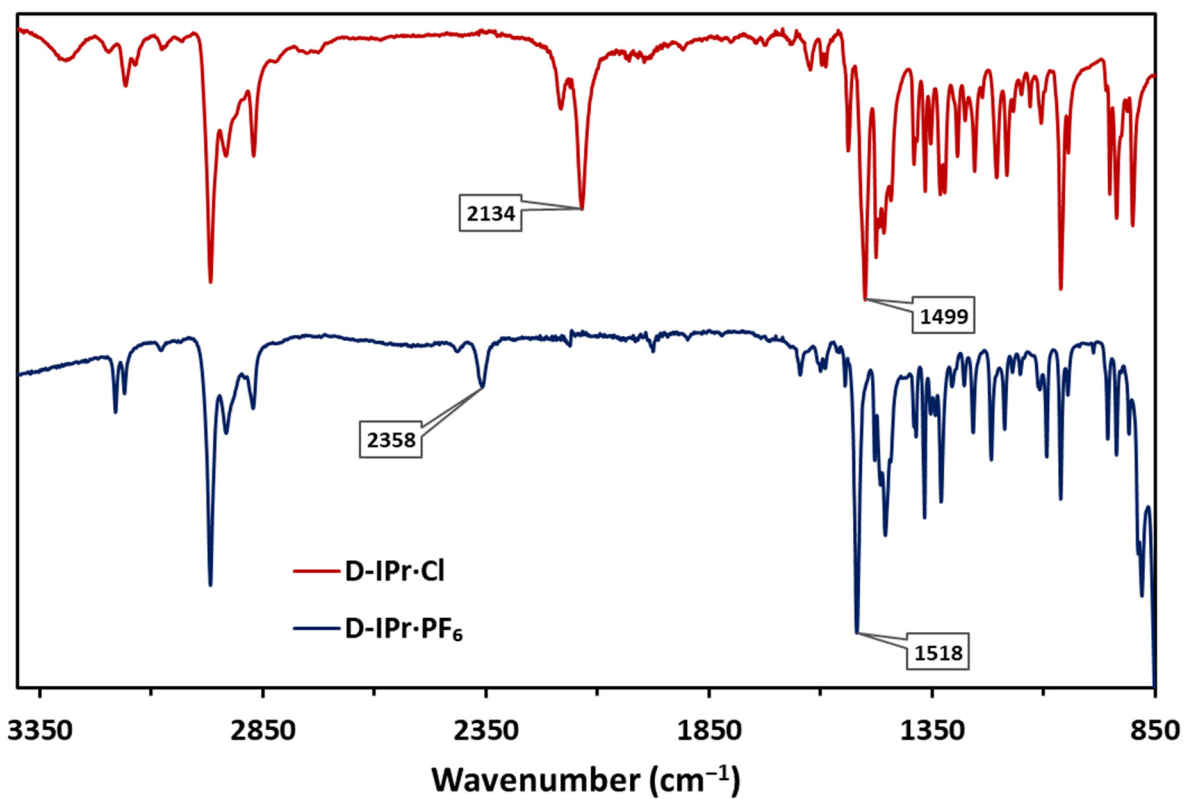

**Figure S40.** *Di*-ATR-FTIR of solid compounds D-IPr·Cl (top, red trace), and D-IPr·PF<sub>6</sub> (bottom, blue trace).

## S1.4 References

- (1) Jafarpour, L.; Stevens, E. D.; Nolan, S. P. A Sterically Demanding Nucleophilic Carbene: 1,3-Bis(2,6-Diisopropylphenyl)Imidazol-2-Ylidene). Thermochemistry and Catalytic Application in Olefin Metathesis. *J. Organomet. Chem.* **2000**, *606* (1), 49–54. [https://doi.org/10.1016/S0022-328X\(00\)00260-6](https://doi.org/10.1016/S0022-328X(00)00260-6).
- (2) Wei, S.; Wei, X.-G.; Su, X.; You, J.; Ren, Y. Insight into the Role of the Counteranion of an Imidazolium Salt in Organocatalysis: A Combined Experimental and Computational Study. *Chem. – Eur. J.* **2011**, *17* (21), 5965–5971. <https://doi.org/10.1002/chem.201002839>.
- (3) Busschaert, N.; Wenzel, M.; Light, M. E.; Iglesias-Hernández, P.; Pérez-Tomás, R.; Gale, P. A. Structure–Activity Relationships in Tripodal Transmembrane Anion Transporters: The Effect of Fluorination. *J. Am. Chem. Soc.* **2011**, *133* (35), 14136–14148. <https://doi.org/10.1021/ja205884y>.
- (4) Cicač-Hudi, M.; Bender, J.; Schlindwein, S. H.; Bispinghoff, M.; Nieger, M.; Grützmacher, H.; Gudat, D. Direct Access to Inversely Polarized Phosphaalkenes from Elemental Phosphorus or Polyphosphides. *Eur. J. Inorg. Chem.* **2016**, *2016* (5), 649–658. <https://doi.org/10.1002/ejic.201501017>.
- (5) Connors, K. A. Binding Constants: The Measurement of Molecular Complex Stability; Wiley, 1987.
- (6) Vander Griend, D.A.; DeVries, M. J.; Greeley, M.; Kim, Y.; Wang, N.; Buist, D; Ulry, C. SIVVU, <http://sivvu.org>, 2021
- (7) Lawler, F. C.; Storteboom, R. S.; Rosales-Lopez, P. D.; Hoogstra, M. N.; Selvaggio, K. J.; Chen, T.; Zogg, K. A.; Heule, D. L.; Pehrson, N. J.; Baker, A. E.; Vander Griend, D. A. On the Replicability of the Thermodynamic Modeling of Spectroscopic Titration Data in the Nickel(II) En System. *Journal of Chemometrics* **2024**, *38* (12), e3619. <https://doi.org/10.1002/cem.3619>.
